# Supplementary material for: An updated, homogeneous, and declustered earthquake catalog for South Korea and neighboring regions
Source: Copernicus journal article supplement (doi:10.5194/nhess-25-4021-2025), 2025-10-20
Supplement: Supplementary file 1 [file Figures S1-S6_Completeness analysis.pdf › Figures S1-S6_Completeness analysis.pdf]

## Supplementary Material

This section presents plots depicting the magnitude completeness periods obtained through the CUVI and Stepp methods for declustered earthquake catalogs using the Uhrhammer, Reasenberg, and Marsan techniques.

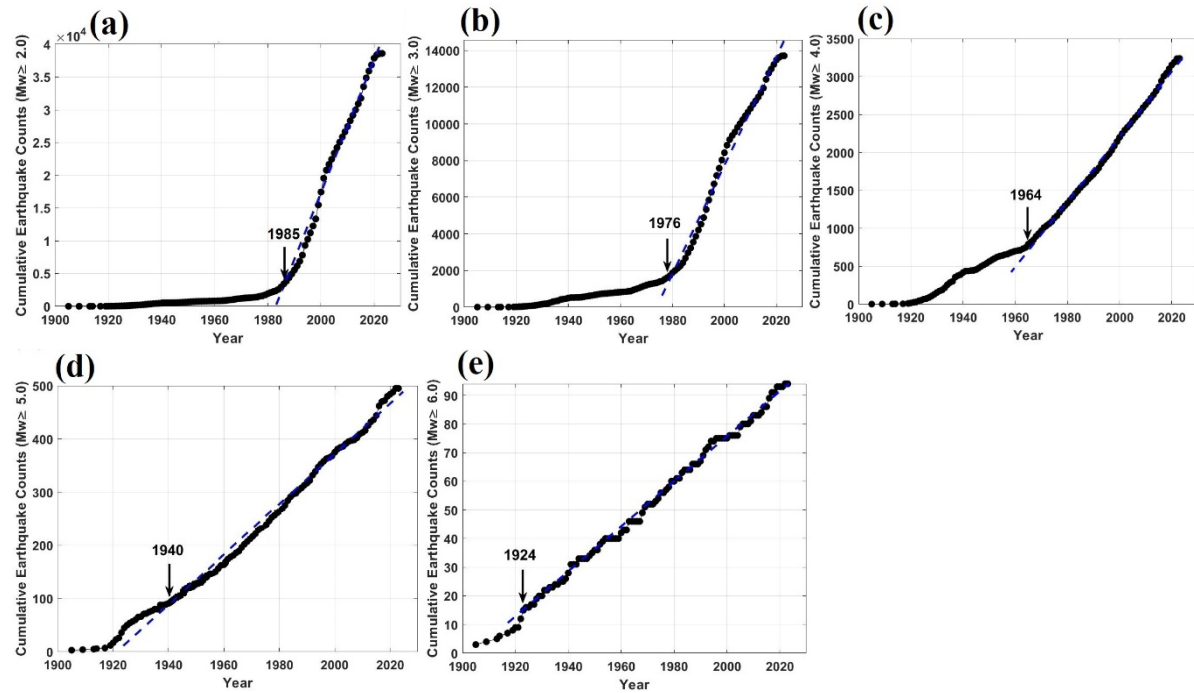

**Figure S1: Completeness analysis for the Uhrhammer declustered catalog using the CUVI method for each magnitude range: (a)  $M_w \geq 2.0$  (b)  $M_w \geq 3.0$  (c)  $M_w \geq 4.0$  (d)  $M_w \geq 5.0$  (e)  $M_w \geq 6.0$ . Arrows indicate the completeness year.**

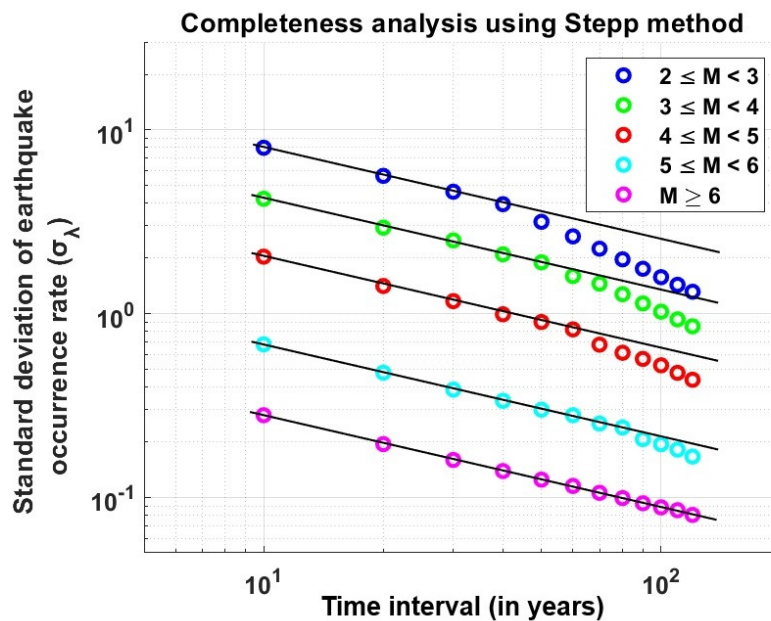

**Figure S2: Completeness analysis of the Uhrhammer declustered catalog using Stepp's method for different magnitude ranges with a 10-year time interval.**

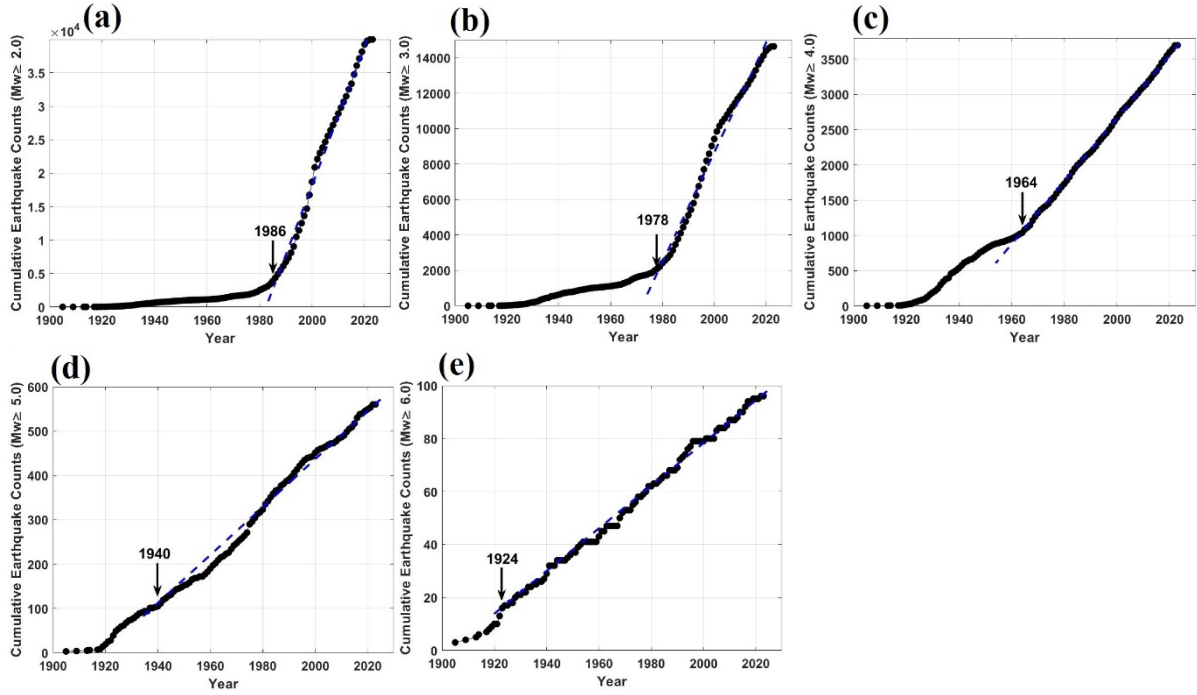

**Figure S3: Completeness analysis for the Reasenberg declustered catalog using the CUVI method for each magnitude range: (a)  $M_W \geq 2.0$  (b)  $M_W \geq 3.0$  (c)  $M_W \geq 4.0$  (d)  $M_W \geq 5.0$  (e)  $M_W \geq 6.0$ . Arrows indicate the completeness year.**

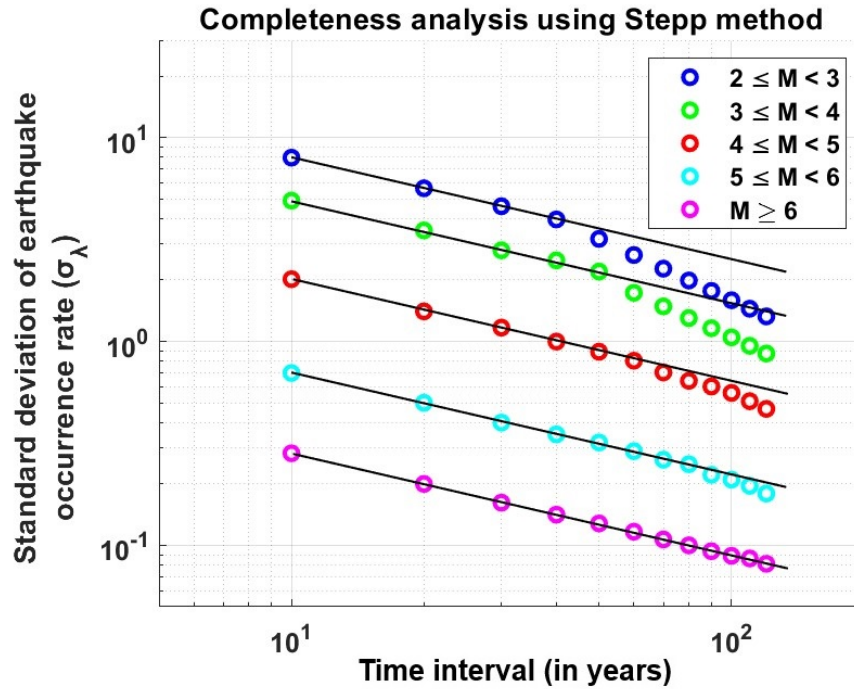

**Figure S4: Completeness analysis of the Reasenberg declustered catalog for Stepp's method for different magnitude ranges with a 10-year time interval.**

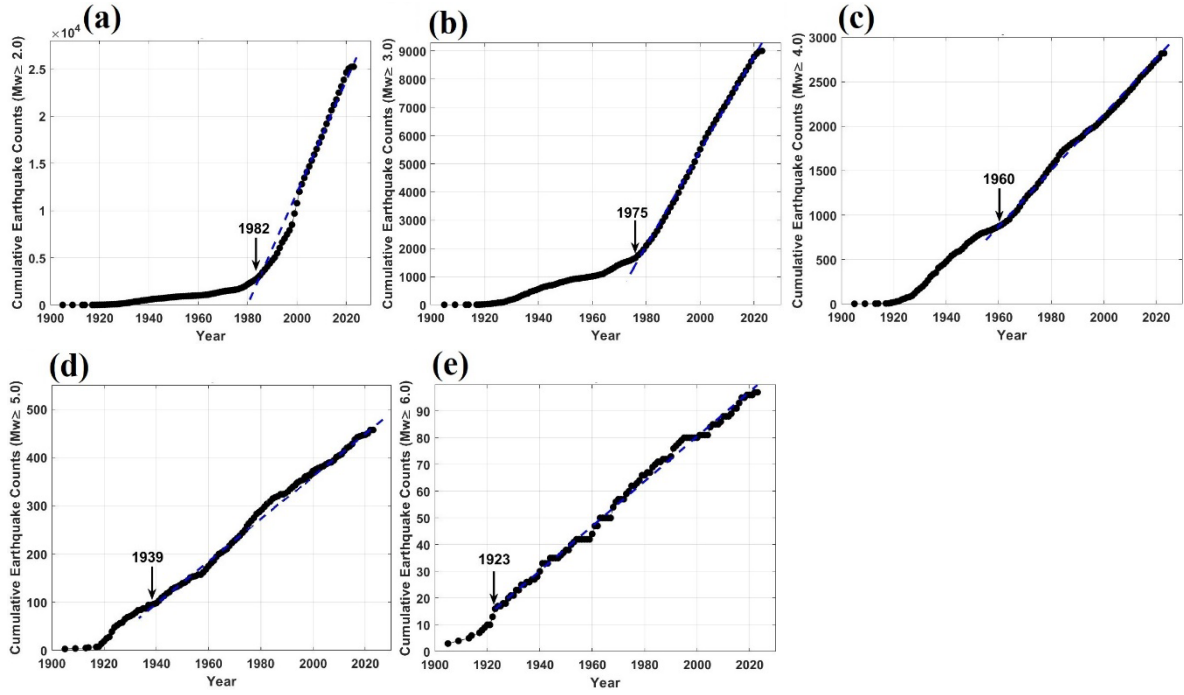

**Figure S5: Completeness analysis for the Marsan declustered catalog using the CUVI method for each magnitude range: (a)  $M_w \geq 2.0$  (b)  $M_w \geq 3.0$  (c)  $M_w \geq 4.0$  (d)  $M_w \geq 5.0$  (e)  $M_w \geq 6.0$ . Arrows indicate the completeness year.**

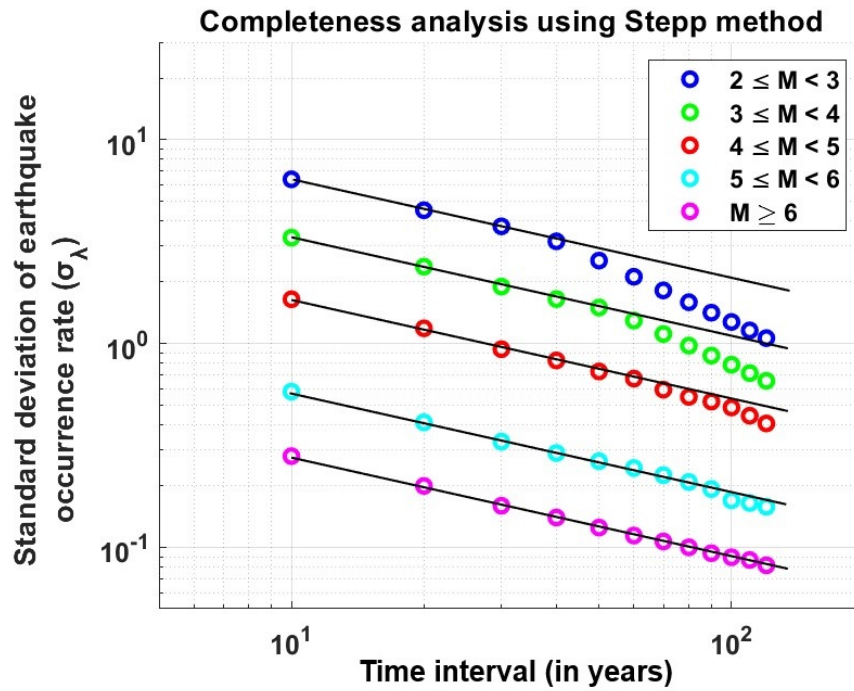

**Figure S6: Completeness analysis of the Marsan declustered catalog using Stepp's method for different magnitude ranges with a 10-year time interval.**
