# Supplementary material for: An updated, homogeneous, and declustered earthquake catalog for South Korea and neighboring regions
Source: Copernicus journal article supplement (doi:10.5194/nhess-25-4021-2025), 2025-10-20
Supplement: Supplementary file 3 [file Table S2_Mainshocks_Gardner_Method.xlsx]

## Sheet: Gardner_mainshocks
Year	Month	Date	Hr	Min	Sec	Latitude	Longitude	Depth	Mw
1905	6	2	14	39	42	34	132	100	7.8
1905	7	7	7	17	0	42	132	100	6.2
1905	8	25	18	46	45	43	129	470	6.8
1909	11	10	15	13	31	32.344	130.65	140	7.6
1913	4	13	15	40	18	31.5	132	35	6.8
1914	1	12	18	28	6	31.5	131	50	7
1917	7	31	12	23	11	42.422	130.24	460	7.5
1919	3	14	8	12	49.28	33.6183	131.666	91	5.2
1919	4	25	21	22	51.14	32.5487	130.253	2	5.3
1919	7	2	16	21	0.45	33.0308	131.808	10	5.2
1919	12	12	1	44	51.84	33.7115	131.656	70	5
1919	12	21	6	41	34.84	31.4433	131.796	0	6
1920	2	23	15	33	25.63	33.4562	132.421	22	5.3
1920	5	6	18	40	35	43	131.5	520	6.2
1920	5	22	4	19	30.13	32.6567	131.989	10	5.4
1920	7	16	19	15	51.83	31.7887	132.017	3	5.2
1920	12	19	7	51	14.12	33.0477	130.708	0	5.3
1920	12	20	0	12	7.21	32.7937	130.202	0	4.5
1921	1	12	23	53	18.5	33.4998	131.934	35	4.8
1921	4	19	2	58	54.02	32.4755	132.068	36	5.3
1921	4	25	16	11	3.37	33.625	131.911	92	5
1921	9	2	2	22	26.36	32.339	131.442	65	4.4
1921	10	14	4	34	44.69	32.8062	131.661	0	5
1921	11	15	13	50	2.35	35.6032	130.91	7	5.1
1921	11	15	22	51	27.43	35.1158	130.936	0	5
1921	11	16	22	52	35.31	31.2165	131.521	40	5.2
1922	1	31	22	17	31.92	41.115	125.54	15	7.3
1922	7	12	13	30	57.79	33.2372	131.385	15	4.6
1922	8	9	6	6	59.09	33.7933	132.267	14	4.8
1922	12	8	1	50	19	32.629	129.69	15	6.8
1922	12	8	11	2	0	31.5	130	0	6.2
1923	1	11	21	24	25.24	32.0977	132.359	44	5.5
1923	3	3	19	24	33.45	42.0307	131.687	632	5.3
1923	4	17	10	28	32.98	32.2718	130.77	38	4.8
1923	7	14	8	56	15	31.5	130	0	6.3
1923	7	22	3	26	48.51	31.3338	131.921	9	4.8
1923	7	27	8	27	6	43	130	430	6
1923	7	27	8	37	10.08	42.968	131.619	512	5.6
1923	9	17	7	59	39.43	31.2233	131.66	123	5
1923	10	3	23	21	48.66	32.9887	131.575	63	5.1
1923	11	27	12	21	30.81	31.5707	132.213	29	5.7
1923	12	5	8	39	0	32	127.5	0	6.2
1924	3	24	9	51	54.32	33.4873	131.95	38	5.2
1924	4	1	16	3	58.27	31.0753	131.201	0	5.3
1924	6	6	18	18	39.84	32.0715	131.274	110	5
1924	6	30	18	9	34.82	32.4142	130.463	2	5.3
1924	8	29	8	50	36	33.5	131	35	6.1
1924	8	29	8	50	36.25	32.841	131.93	0	5.8
1924	11	30	10	32	0.88	31.493	131.77	0	5.6
1925	5	1	17	17	14.78	33.6465	132.268	1	5.2
1925	5	7	2	3	35.35	33.3347	131.838	0	4.3
1925	5	10	4	24	1.31	34.0507	131.786	65	4.6
1925	6	11	15	59	43.13	34.1043	131.122	17	4.1
1925	6	27	2	27	25.18	32.1073	131.59	0	4.8
1925	7	13	15	9	27.05	33.3913	132.213	57	4.5
1925	9	17	17	9	35.39	32.3408	129.143	32	5.4
1926	1	22	6	26	53.31	33.3367	132.163	10	5.2
1926	1	25	23	39	29.02	31.1427	131.626	0	5.3
1926	1	30	20	53	29.27	33.508	131.775	81	4.7
1926	4	7	8	45	27.8	31.6115	131.804	0	5.3
1926	6	5	18	9	39	31	130	180	6.5
1927	1	10	0	19	56.66	32.0855	130.139	7	4.3
1927	2	18	21	11	41.25	32.668	130.809	102	4.8
1927	5	8	20	14	53.77	32.0958	130.005	32	4.3
1927	5	10	17	39	34.85	33.198	131.384	98	4.4
1927	6	10	2	51	10.38	32.044	130.996	0	4.2
1927	8	9	3	49	55.17	31.9402	131.655	142	4.7
1927	8	21	11	35	13.41	32.2418	129.987	0	4.4
1927	9	14	13	18	56.73	33.796	131.849	33	4.2
1927	10	17	15	4	7.83	31.8823	131.738	0	4.9
1927	10	30	10	0	57.42	32.1105	130.383	23	3.9
1927	12	4	12	53	6.12	32.5047	129.727	6	5.2
1927	12	11	22	12	45.96	32.1775	131.256	111	4.3
1928	2	15	8	44	41.23	32.4427	131.168	14	4.3
1928	2	22	1	28	6.82	32.9682	132.083	98	4
1928	3	23	5	16	9.82	34.469	132.409	8	4.3
1928	4	16	22	41	29.18	31.3502	131.351	65	4.5
1928	4	30	20	5	39.18	32.7187	129.284	12	4.6
1928	5	30	3	17	32.11	31.9233	131.016	107	4.1
1928	6	3	17	31	4	31.639	128.91	10	6.6
1928	6	3	18	18	48.61	32.438	128.541	0	5.5
1928	6	14	9	27	34.74	31.0532	130.514	113	4.8
1928	7	10	15	20	20.57	32.5015	129.609	11	4.7
1928	8	22	10	30	32.11	32.7322	130.635	6	5
1928	9	25	13	58	42	33.5	132	120	6.1
1928	9	28	17	5	51.61	32.873	130.886	5	4.3
1928	11	5	13	40	55.59	33.362	131.124	40	4.7
1928	11	16	12	13	32.8	32.5533	129.747	3	4.4
1928	12	10	6	20	16.04	33.1458	129.616	24	4.5
1928	12	22	4	36	31.74	33.0083	130.764	0	4.2
1928	12	22	8	17	32.22	33.0785	131.108	18	4.6
1929	1	2	1	40	6.27	33.1207	130.867	4	5.3
1929	3	15	19	13	43.27	32.8702	132.234	18	4.5
1929	3	21	5	3	22.92	34.3763	129.423	0	4.8
1929	4	12	9	51	1.88	31.5725	130.691	111	4.5
1929	4	15	14	59	2.8	32.4927	131.189	121	4.5
1929	5	21	18	14	18.89	33.0292	127.508	9	4.6
1929	5	22	1	35	36	31.823	131.57	35	6.8
1929	5	22	9	18	53.79	33.2877	127.356	0	4.1
1929	5	29	8	38	56.49	32.664	130.859	33	3.6
1929	6	9	8	18	11.5	33.1717	131.041	0	3.9
1929	6	26	17	46	0.63	34.9737	131.369	0	4.5
1929	8	4	1	0	4.53	34.232	130.616	9	5.2
1929	8	8	22	33	18.88	33.5392	130.273	9	5
1929	8	16	15	16	29.87	32.5368	132.019	39	4.3
1929	8	31	12	7	28.66	34.2808	131.274	37	4.4
1929	9	5	21	56	4.09	33.8382	132.194	13	4.1
1929	10	1	0	58	36.48	33.558	131.493	122	4.5
1929	10	2	21	36	38.76	32.5458	129.287	0	4.5
1929	10	10	4	45	25.56	33.1477	131.33	140	4.7
1929	10	25	3	57	19.99	32.6115	130.458	39	4.8
1929	12	18	13	2	36.47	35.8307	129.713	19	4.3
1929	12	21	10	47	33.54	33.79	132.211	24	4.1
1929	12	26	18	0	30.82	32.2575	132.169	11	4.7
1930	1	15	12	35	18.67	32.6313	129.936	0	4.3
1930	1	25	11	34	17.16	32.7713	131.281	169	4.7
1930	2	5	22	28	22.73	33.4618	130.313	0	4.9
1930	3	23	7	10	24.37	32.7562	130.036	19	4.2
1930	3	27	4	11	45.51	33.6398	132.441	6	4.1
1930	3	31	5	9	23.34	33.376	132.015	46	4.6
1930	4	4	3	30	10.38	33.6242	132.341	40	4.3
1930	4	25	18	16	0.5	33.3722	131.345	0	4.5
1930	4	25	21	31	37.59	33.2318	131.358	0	4.5
1930	6	14	18	24	43.75	32.9145	129.589	39	4
1930	6	21	18	47	25.23	32.0817	132.42	0	4.8
1930	7	10	13	14	58.77	33.7968	132.434	86	3.9
1930	7	18	19	22	1.48	32.9305	130.89	6	4.6
1930	9	29	13	52	26.03	31.232	129.804	284	5
1930	10	21	14	25	18.39	33.46	132.25	77	4.8
1930	12	12	2	12	10.57	33.4602	131.706	84	4.3
1930	12	13	1	1	55.89	32.9407	130.903	14	4.3
1930	12	13	4	42	55.72	33.0435	130.799	10	4.3
1930	12	18	19	41	16.25	31.9857	129.05	7	4.5
1931	1	15	22	38	54.67	32.7903	130.49	3	4.8
1931	1	31	0	46	22.57	33.7595	132.332	50	4
1931	2	26	5	30	3.06	31.9875	132.356	3	4.6
1931	3	8	6	40	13.34	32.8753	131.888	40	4.1
1931	3	17	18	46	6.39	31.1827	130.54	148	4.7
1931	4	28	14	43	24.07	33.0937	131.054	6	4.3
1931	4	28	15	6	41.17	33.0533	131.084	11	4.3
1931	4	28	17	47	26.95	33.0885	131.066	8	4.3
1931	6	29	1	9	17.49	31.1112	131.008	0	4.5
1931	6	29	14	22	26.8	33.3318	132.12	44	4
1931	8	12	20	20	31.35	32.8565	130.57	7	3.8
1931	9	21	7	42	50.88	33.5553	131.938	84	4.3
1931	9	24	23	12	49.54	32.5705	130.624	17	3.8
1931	10	8	7	6	8.92	33.7032	132.181	71	4.1
1931	11	2	3	53	12	32.5	132	35	6.5
1931	11	2	19	3	4	31.899	132.01	35	7.5
1931	11	14	13	29	22.09	33.5653	132.273	69	4.3
1931	11	16	21	38	58.31	32.5767	130.021	17	4.3
1931	12	21	14	47	11.41	32.4865	130.488	0	5.3
1931	12	22	22	7	54.23	32.5037	130.502	15	5.3
1931	12	26	10	42	53.23	32.4943	130.529	17	5.5
1932	1	3	6	53	19.46	31.1443	131.633	36	4.8
1932	1	5	17	21	21.54	34.1538	131.735	26	4.1
1932	1	21	23	42	54.47	31.3523	130.765	162	4.8
1932	2	3	18	35	14.68	31.3815	129.376	61	4.4
1932	2	13	6	33	14.48	33.3688	132.181	0	4.2
1932	2	15	6	32	24.92	31.1022	130.583	137	4.7
1932	2	28	8	59	20.84	34.5208	132.031	1	4.4
1932	3	5	17	49	19.79	33.3353	132.097	55	4.2
1932	3	14	22	52	23.99	35.4387	123.404	0	4.7
1932	3	17	14	1	36.68	33.8692	130.304	27	4
1932	5	3	8	29	12	31.5	131	35	5.8
1932	8	23	15	31	22.84	32.6905	130.831	17	3.8
1932	8	24	22	18	10.97	32.6132	130.584	122	4.1
1932	8	24	22	51	7.14	33.274	130.461	0	3.9
1932	8	26	22	52	55.02	31.283	131.329	0	4.5
1932	9	29	12	42	43.28	33.9732	130.5	8	4.4
1932	9	29	15	49	30.4	33.3713	132.348	5	4.1
1932	10	1	18	22	14.36	32.5828	130.471	7	3.8
1932	10	5	12	21	57.49	33.2278	132.101	72	4.1
1932	10	27	17	36	45.71	33.4555	131.648	60	4.2
1932	11	9	4	32	43.83	33.7673	132.396	59	4.1
1932	11	18	5	11	40	31	130.5	100	5.6
1932	11	29	15	21	49.2	32.6527	130.897	24	3.8
1932	12	21	14	54	28.2	32.8295	130.596	11	3.8
1933	1	14	11	10	28.75	32.9182	130.995	5	4.4
1933	1	15	18	55	21.49	31.2458	131.223	0	4.6
1933	1	16	18	22	3.42	31.7362	129.935	0	4
1933	1	27	3	33	28.36	32.8593	131.06	0	4.2
1933	2	6	16	17	3.18	32.9663	131.024	11	4.5
1933	2	7	10	27	35.18	32.9685	131.06	0	4.5
1933	2	17	4	20	49.96	32.0015	130.779	25	4.2
1933	3	10	16	29	24.45	32.721	130.545	20	3.7
1933	3	21	2	8	58.15	33.3708	132.024	49	4.2
1933	3	22	8	18	16.99	32.9055	130.952	7	4.6
1933	3	25	21	50	20.83	32.8395	130.945	12	4.9
1933	5	16	15	32	4.64	31.1465	131.4	0	4.5
1933	5	24	1	51	50.19	31.1748	131.72	73	5
1933	6	2	16	38	45	31	131.5	35	6.2
1933	6	3	22	31	0.91	32.9648	131.108	14	4.2
1933	6	5	11	57	26.07	33.5072	132.362	47	4.1
1933	6	13	7	17	29.17	32.736	130.717	1	3.9
1933	6	16	19	43	21.99	33.9438	132.469	0	4.1
1933	7	10	1	55	56.28	33.3567	131.504	0	4.3
1933	7	15	1	3	35	43	131	530	5.8
1933	7	24	17	37	57	42.5	131	550	6
1933	8	16	13	10	35.37	32.7742	130.795	15	4.3
1933	8	29	15	39	38.35	33.1662	130.538	20	4.3
1933	9	10	6	18	54.49	32.504	130.558	20	3.8
1933	9	18	22	25	9.97	31.5125	128.819	0	4.5
1933	9	24	22	49	16.75	33.4082	132.206	25	4.1
1933	9	27	0	58	53.78	32.8623	130.933	5	4.3
1933	9	27	2	39	34.82	31.8838	130.866	156	4.3
1933	9	29	22	58	42.71	32.9062	130.929	4	4.1
1933	10	2	4	24	4.31	32.8707	131.379	115	4.5
1933	10	2	21	52	28.35	32.8548	130.892	8	3.9
1933	10	6	6	32	8.67	32.7422	130.048	0	3.9
1933	11	6	16	25	9.4	32.7635	128.607	10	4.7
1933	11	10	2	21	40.76	32.7533	130.777	7	4.1
1933	12	12	2	25	44.99	32.4418	130.125	0	4.1
1934	1	10	8	39	21.39	34.351	132.036	14	3.9
1934	1	15	6	36	14	33.012	130.891	9	3.9
1934	1	29	10	38	46.34	32.9935	130.896	15	5.1
1934	4	10	15	54	11.17	33.6193	131.795	44	4.2
1934	4	28	11	1	21.64	33.5472	130.315	15	4.3
1934	5	11	9	0	19.09	33.6602	131.907	32	4.2
1934	5	13	9	15	38.19	34.4697	131.743	9	4.2
1934	5	17	22	57	3.06	33.5565	131.905	3	4
1934	5	18	20	17	29.26	32.7077	129.758	15	4.3
1934	5	30	16	1	33.78	31.847	130.591	201	4.5
1934	6	6	8	53	39.64	32.9032	130.546	5	3.9
1934	6	7	22	31	59.02	32.9223	130.565	4	3.9
1934	6	19	17	52	18.04	32.6197	130.757	14	3.8
1934	6	27	5	34	16.93	33.3582	131.85	12	4.5
1934	7	1	14	11	8.29	32.3373	132.223	0	4
1934	7	10	15	58	10.58	32.0925	131.979	15	4.5
1934	8	4	1	38	41.93	33.2743	131.72	68	4
1934	8	20	17	24	23.13	34.0027	132.267	14	4.1
1934	8	22	21	57	56.73	31.0647	130.203	142	4.3
1934	9	1	8	5	30.58	33.7442	131.293	0	4.6
1934	9	1	11	44	51.81	32.0045	131.867	20	4.5
1934	9	12	23	27	8.67	31.104	130.224	40	4.6
1934	9	16	10	29	33.12	32.9127	130.633	18	3.9
1934	10	18	13	43	46.18	32.0133	130.092	1	4.4
1934	10	23	16	46	14.32	32.6182	131.182	138	4.4
1934	10	27	21	39	21.24	33.1868	131.122	2	4.1
1934	10	28	2	4	40.48	33.1573	131.103	13	4.1
1934	11	14	21	17	56.23	32.0533	130.118	0	4
1934	12	3	12	26	55.41	32.1092	131.847	0	4.5
1934	12	19	5	35	7.73	32.0905	131.696	0	4.5
1934	12	22	9	40	59.32	33.2965	132.419	31	4.2
1935	1	22	9	33	9.62	31.5783	129.431	2	4.8
1935	2	5	5	9	59.31	33.6982	132.305	82	4.2
1935	2	14	2	7	37.1	31.9483	132.01	17	4.1
1935	2	17	20	5	17.48	31.5952	131.392	66	4.1
1935	3	7	19	41	11.78	33.0877	131.208	14	4.6
1935	3	26	4	33	30.41	31.81	132.237	6	4.5
1935	3	29	8	47	51	43	131	550	6.2
1935	3	30	9	3	56.22	34.334	132.338	21	3.9
1935	4	14	19	49	17.39	32.7367	132.005	0	4.3
1935	4	21	23	27	52.73	34.5762	132.195	14	4.1
1935	4	28	22	32	1.67	31.0408	130.12	137	4.1
1935	5	8	5	8	1.68	33.5013	131.739	32	3.8
1935	5	18	13	9	35.49	31.359	131.505	138	4.5
1935	5	23	15	10	11.61	32.859	131.825	73	4.9
1935	7	3	9	19	5.99	31.7863	131.175	8	4.7
1935	7	4	7	20	54.13	33.3892	132.102	33	3.8
1935	7	17	0	0	28.02	34.5863	131.03	20	5.3
1935	7	19	7	25	54.88	31.6458	130.861	24	4.1
1935	8	18	8	24	36.74	32.4178	132.36	5	4.4
1935	8	19	6	21	41.9	32.6158	130.423	0	3.9
1935	9	9	14	13	19.6	32.1885	130.119	13	4.9
1935	9	10	23	22	30.15	33.9418	132.087	27	4.1
1935	10	2	18	27	46	31	130	120	5.6
1935	10	3	13	30	45.7	32.8232	131.703	7	4.1
1935	10	16	3	23	5.86	32.1593	130.121	12	4.3
1935	10	20	10	14	39.43	33.3005	131.966	16	4.1
1935	11	23	9	14	25.46	33.3937	130.866	12	4.3
1935	11	25	12	37	11.41	31.9362	130.603	172	4.1
1935	12	19	12	55	4.38	33.3418	132.204	54	4.1
1935	12	28	12	29	24.99	32.0988	131.764	0	4.2
1936	1	1	2	50	47.12	32.8048	131.351	116	4.3
1936	1	15	10	16	10.29	32.9727	130.638	0	3.8
1936	1	19	2	22	51.5	32.4497	130.438	4	4.3
1936	1	30	21	51	21.86	31.4118	131.357	0	4.1
1936	2	6	17	0	24.01	34.247	132.269	0	3.9
1936	4	6	2	36	16.37	32.0367	131.851	60	4
1936	4	14	10	19	50.39	32.7973	131.662	2	4.4
1936	4	21	18	7	41.25	33.8738	132.345	0	3.9
1936	5	24	20	8	17.88	32.4977	130.583	6	4.3
1936	5	25	10	17	41.01	31.6483	131.266	35	4.5
1936	5	27	0	36	16.66	31.2683	130.769	113	4.5
1936	6	5	6	15	12.69	32.8203	131.764	4	3.9
1936	7	4	6	2	19.23	36.004	129.704	32	4.9
1936	7	12	0	58	10.14	32.7122	132.137	8	4.1
1936	7	26	14	44	11.54	33.5835	131.902	90	4.1
1936	8	27	14	23	45.32	32.0567	131.122	14	3.9
1936	11	2	18	37	7.67	32.9087	130.562	3	4.2
1936	11	5	20	15	13.96	32.3495	130.686	27	4.4
1936	11	7	1	23	45.44	33.1743	132.031	0	4.1
1936	11	14	11	7	27.57	31.7333	130.074	30	3.9
1936	11	28	17	20	12.38	34.3705	131.736	10	3.8
1937	1	4	19	30	53.47	33.1352	130.817	9	3.7
1937	1	5	16	0	17.23	32.737	130.683	3	4.4
1937	1	6	6	38	2	31.048	132.43	20	6.5
1937	1	6	10	2	22.98	31.9742	132.229	0	4.3
1937	1	9	18	21	37.75	31.477	131.71	41	4.1
1937	1	23	17	27	35.9	33.4273	132.336	72	4.2
1937	1	23	17	49	46.7	33.0758	131.454	109	4.8
1937	1	27	16	4	46	32.7855	130.814	9	5
1937	1	28	9	43	42.53	32.7082	130.711	0	5
1937	2	4	19	20	24.35	33.5325	132.222	76	3.9
1937	2	4	19	29	5.64	33.5187	132.184	20	3.9
1937	2	6	10	23	41.2	31.7852	131.873	1	4.5
1937	2	11	12	12	37.8	32.0662	131.094	97	4.6
1937	2	12	16	28	42.88	32.4742	131.462	0	4.2
1937	2	14	10	5	15.92	33.1253	132.106	57	5
1937	2	21	13	6	57.38	32.7715	130.771	4	3.4
1937	2	27	23	41	58.1	33.862	132.116	63	5.7
1937	3	9	15	41	52.54	32.8398	130.938	7	4.2
1937	3	14	20	15	37.82	31.1137	131.41	45	4.5
1937	3	16	2	45	18.52	36.3418	126.521	0	4.1
1937	3	23	1	59	19.68	31.8265	131.998	0	4.8
1937	5	20	6	17	57.5	33.2998	132.097	52	4.1
1937	6	2	6	39	10.58	32.6918	130.749	12	3.8
1937	6	13	13	33	57.18	31.6357	131.948	0	4.7
1937	6	13	16	21	6.37	32.0127	131.538	16	4.5
1937	6	21	3	40	58.83	34.9553	132.311	0	4.1
1937	6	23	11	7	59.53	31.9045	131.163	23	4.6
1937	6	24	5	41	39.74	31.5093	131.53	52	5.1
1937	7	9	13	8	5.88	32.6948	129.996	0	4.8
1937	7	14	17	50	21.3	31.7783	131.122	0	3.9
1937	7	29	17	34	33.97	32.7317	130.702	9	3.4
1937	8	8	5	46	35.37	30.9992	131.408	1	4.8
1937	8	27	3	54	10.92	31.2332	131.799	42	5.7
1937	9	8	19	8	25.35	32.1202	129.856	3	4.3
1937	9	9	17	22	22.42	33.7598	132.16	39	4.1
1937	9	19	9	52	18.47	33.0792	131.24	10	4.5
1937	9	21	6	18	46.68	33.4975	131.991	7	4.2
1937	9	24	0	44	12.7	32.7277	130.637	9	4.4
1937	10	2	0	18	13.45	32.134	130.052	2	4.3
1937	10	2	20	26	55.2	34.1123	130.16	0	4.1
1937	10	4	5	37	24.76	32.1148	131.805	23	4.7
1937	10	12	13	33	51.5	32.1297	129.81	11	4
1937	10	25	12	29	2.61	31.5195	131.136	0	4.3
1937	10	26	7	50	9.61	32.1017	129.824	5	4.3
1937	10	28	22	12	13.51	32.1052	129.863	6	4.3
1937	11	9	10	17	38.1	31.8657	131.002	112	4.3
1937	11	20	11	14	26.41	33.2777	131.408	115	3.9
1937	11	29	14	43	37.57	31.6828	132.018	82	4.1
1937	12	14	16	16	39.42	32.026	129.811	23	4.5
1937	12	15	23	27	28.02	34.788	131.396	24	4.3
1937	12	25	22	52	14.68	32.6542	132.344	56	5.3
1938	1	8	14	50	59.31	33.686	132.013	71	4.6
1938	1	19	14	12	53.39	31.5152	130.987	84	4.6
1938	1	23	3	21	7.46	32.7423	130.667	7	3.6
1938	2	8	17	15	35.07	32.8252	130.557	7	3.8
1938	2	15	17	32	40.56	32.5305	129.833	8	4.3
1938	2	19	1	22	14.95	31.1118	130.403	159	4.2
1938	2	28	7	42	47.29	31.9953	131.03	10	4.2
1938	3	5	2	9	0.85	32.0347	131.041	7	4.3
1938	3	17	5	39	33.53	33.727	132.248	2	4.3
1938	3	28	22	5	26.69	31.7683	130.23	0	4.9
1938	4	22	21	15	0.92	31.2522	130.316	149	4.1
1938	6	1	12	43	42.27	34.1865	132.406	46	3.7
1938	8	12	12	0	29	33.2497	132.073	76	4.3
1938	8	13	7	25	15.18	32.8665	130.666	5	4.4
1938	8	22	9	46	27.08	35.271	127.701	11	4.8
1938	8	26	8	38	25.85	33.4747	131.76	8	4.3
1938	10	1	13	4	1.96	33.4	132.219	22	4.2
1938	10	8	8	59	48.16	32.7645	130.593	5	4
1938	10	13	1	59	28.01	33.734	132.262	27	3.9
1938	12	19	19	26	7.03	33.955	132.261	8	3.7
1939	1	3	2	13	1.16	32.7457	129.97	3	3.9
1939	1	10	10	4	0.7	36.4895	127.063	5	4.4
1939	1	22	1	19	37.08	32.5715	130.527	29	3.9
1939	2	19	2	44	59.69	31.1702	131.189	33	4.8
1939	3	18	4	18	39.91	32.4003	130.776	40	4
1939	3	20	12	22	28	32.508	131.69	25	6.7
1939	3	22	7	43	1.44	33.3137	132.18	64	4.3
1939	4	3	9	1	53.94	33.7243	132.236	12	4
1939	4	6	22	50	25.38	33.0972	132.086	37	3.7
1939	4	15	0	57	11.65	33.7565	131.721	94	4.6
1939	5	30	19	34	37.34	32.0402	131.063	104	4.8
1939	6	6	3	32	28.26	33.4563	132.329	5	3.6
1939	6	21	16	40	30.79	31.1738	131.196	0	4.8
1939	6	29	20	57	59.86	33.5298	131.827	74	4
1939	6	29	23	13	2.3	31.6818	132.218	55	4.8
1939	8	4	7	30	20.56	33.4127	130.316	23	4.1
1939	8	31	14	7	53.77	36.3765	127.115	8	4.7
1939	9	1	20	17	36.14	34.1985	131.542	14	3.7
1939	9	7	9	33	23.28	33.6087	132.184	59	3.7
1939	9	10	19	50	21.25	32.704	130.143	5	3.9
1939	10	24	6	23	2.81	31.4173	130.627	173	4.3
1939	11	4	2	19	8.39	33.5558	132.435	4	3.6
1939	12	27	17	54	21.7	33.3928	130.785	4	4.1
1940	1	7	13	3	30.15	31.3983	131.539	24	4.3
1940	1	7	13	34	43.05	31.4813	131.27	0	4.3
1940	1	11	12	22	43.89	33.2965	131.353	0	3.9
1940	1	19	6	28	8.21	33.6105	131.99	58	4.1
1940	1	19	14	23	43	43	122	35	6.1
1940	2	4	4	31	47.48	33.5437	132.37	24	4.1
1940	2	10	11	32	52.47	31.3692	130.062	9	4
1940	2	22	20	19	3.78	33.1215	131.139	10	3.9
1940	2	23	2	57	40.01	34.2953	131.391	4	4.4
1940	3	2	4	6	56.14	34.2677	130.666	12	3.9
1940	3	4	9	39	11.27	33.5515	132.208	22	3.9
1940	3	26	17	46	29.09	31.312	131.346	0	4.5
1940	4	17	6	48	34.91	31.2085	129.975	139	4.4
1940	4	22	8	59	34.34	33.3452	132.369	37	4.1
1940	4	25	7	5	38.6	34.8098	131.896	33	3.6
1940	5	1	9	19	55.39	33.7098	132.045	60	4.2
1940	5	14	14	50	26.8	33.227	131.903	14	4.1
1940	6	5	22	35	40.04	33.2257	131.016	5	4.2
1940	6	12	17	6	28.89	33.5963	132.33	7	3.6
1940	7	2	2	35	33.95	33.388	131.905	1	4.1
1940	7	6	17	0	48.3	31.8603	132.175	11	4.6
1940	7	22	11	47	14.54	33.7133	131.043	14	4.1
1940	8	5	9	52	59.61	33.4952	132.272	7	4.4
1940	8	6	3	28	13.96	34.335	131.824	12	4.1
1940	8	14	0	36	48	36.019	132.28	10	7
1940	9	29	22	4	50.65	34.0255	131.797	14	4.1
1940	10	17	1	5	2.04	31.8512	131.19	86	4.4
1940	10	19	0	0	47.74	31.8735	131.855	37	4.8
1940	11	1	8	51	6.64	33.4477	131.872	72	3.8
1940	11	4	15	8	43.91	32.6725	130.014	13	2.9
1940	11	14	19	59	1.34	32.739	129.691	6	4.6
1940	12	4	20	14	43.75	33.7322	132.359	52	4.3
1940	12	6	10	22	4.05	33.2635	132.104	44	3.9
1940	12	14	10	40	9.76	31.2432	131.451	4	4.9
1941	1	13	23	8	1.73	32.6915	131.633	21	3.9
1941	1	18	4	34	23.66	31.7495	131.911	0	4.5
1941	1	23	19	3	15.34	31.3425	130.14	0	4.4
1941	1	29	1	53	5.88	33.6372	131.967	18	4.1
1941	2	4	0	40	42.61	32.3587	131.017	79	3.9
1941	2	27	23	14	14.77	31.5797	131.047	1	4.5
1941	3	7	16	16	27.01	33.42	132.288	23	4.1
1941	3	13	19	15	46.32	31.8257	131.813	0	3.8
1941	3	14	11	59	51.22	32.9042	130.921	5	4.1
1941	4	6	1	49	48	34.5	131.75	60	6
1941	4	10	16	20	42.11	32.5813	131.474	43	4.3
1941	5	6	23	56	44.79	32.5905	131.976	13	3.9
1941	5	11	1	45	0.77	31.2078	131.744	1	4.3
1941	5	26	15	35	6.84	32.7093	130.475	64	3.6
1941	6	21	4	36	0.7	33.2633	131.818	11	4
1941	7	14	22	26	1.29	33.6255	132.062	50	4.4
1941	7	20	0	13	14	32	131.75	35	6.2
1941	7	24	9	36	30.44	31.0682	131.618	0	4.9
1941	8	11	19	7	38.7	33.453	131.568	116	4
1941	10	25	7	40	21.43	32.5045	130.61	16	4.4
1941	10	31	23	8	37.14	32.557	129.329	0	4.7
1941	11	19	1	46	33	32.095	131.95	35	7.9
1941	11	19	19	54	39.08	33.2597	131.311	0	4.2
1941	11	28	7	14	4.34	31.3787	131.155	57	4.4
1941	12	12	10	38	2.62	33.0962	132.293	10	3.8
1941	12	15	17	18	37.73	42.1815	125.064	0	5.7
1942	2	3	11	32	28.05	33.0023	131.453	0	4.5
1942	2	22	9	47	14.51	33.5307	132.382	68	5.2
1942	2	25	16	42	23.94	33.837	131.764	41	4.2
1942	3	6	21	50	50.61	33.084	132.449	3	3.7
1942	3	17	1	39	33.55	31.2478	130.031	140	4.5
1942	4	2	3	18	29.06	31.2037	130.724	132	4.6
1942	6	3	14	20	18.99	33.428	131.635	103	4.7
1942	6	8	1	59	40.31	31.1072	130.162	117	4.8
1942	6	20	7	28	3.96	31.0323	131.511	27	4.8
1942	7	4	11	38	26.64	32.9173	130.898	6	3.9
1942	7	13	20	53	57.74	31.9853	129.948	5	4.3
1942	8	11	13	39	49.62	33.6547	132.299	20	4
1942	8	21	14	28	14.32	33.1243	131.232	3	4.3
1942	8	23	9	38	31.02	33.7077	132.229	44	4.1
1942	9	2	19	13	29.92	33.2167	131.347	0	4.3
1942	9	15	0	2	19.27	33.8297	130.295	0	4.4
1942	9	24	3	0	45.71	33.1533	132.101	7	4.5
1942	10	27	14	29	32.14	33.3228	132.177	42	5
1942	12	20	5	40	48.96	33.6927	131.71	1	4.3
1943	4	28	9	56	26.5	33.3165	132.132	24	4.4
1943	6	22	9	27	34.13	32.845	130.725	3	4.2
1943	6	24	19	27	16.99	33.7965	130.578	0	3.8
1943	7	7	17	13	1.58	31.6188	129.169	0	5.1
1943	8	8	0	4	28.81	34.6307	131.725	10	5
1943	10	31	18	45	17.01	34.7388	131.138	40	4.7
1943	11	1	12	28	57.31	31.3473	130.154	128	4.1
1943	11	18	14	58	20.69	31.2497	129.42	25	4.8
1943	11	18	16	11	57.08	32.9705	131.909	52	4.9
1943	12	29	1	4	17.48	33.5895	132.142	43	4.4
1944	1	7	5	55	36.98	32.9778	131.383	2	4.8
1944	1	27	23	8	27.54	33.5637	132.037	37	4
1944	6	7	19	15	1.83	33.2642	131.839	65	5.7
1944	6	20	0	45	38.74	36.9362	123.144	0	5
1944	7	3	18	0	37.48	33.6978	132.404	11	4.3
1944	7	9	12	46	48.98	32.4983	130.595	0	4.3
1944	7	14	10	14	42.67	34.0533	131.925	7	4.8
1944	7	23	0	2	30.59	33.5315	132.401	46	4.2
1944	8	13	10	36	50.7	32.8278	131.253	22	4.3
1944	8	21	9	27	46.21	32.394	131.7	50	4.4
1944	8	22	21	57	3.12	33.134	131.093	11	4.2
1944	8	31	15	43	29.27	32.0155	131.143	85	4.8
1944	9	3	21	54	35.07	32.8362	131.278	106	3.9
1944	9	19	0	26	11.67	33.1997	131.165	24	3.8
1944	10	29	9	56	7.87	32.6542	130.718	18	3.6
1944	12	19	23	8	52.96	38.8328	124.075	25	6.5
1944	12	19	23	9	3	39.887	124.15	35	6.6
1945	1	6	15	13	54.07	33.5302	132.356	13	4.5
1945	1	25	22	59	31.11	33.0077	131.161	8	4.3
1945	2	12	10	51	32.22	33.5152	131.406	102	4.3
1945	3	29	6	32	7.62	31.7123	128.952	43	4.6
1945	4	14	13	22	35.04	31.4785	131.975	5	5
1945	5	5	15	29	37.89	32.2378	132.419	44	4.7
1945	6	2	21	4	24.62	33.4953	131.336	124	4.2
1945	8	21	19	7	13.58	42.2273	131.686	650	5.8
1945	12	10	12	42	11.86	31.2242	129.094	3	5.3
1945	12	20	10	43	12.77	31.6262	131.25	100	4
1946	2	11	6	9	16.7	31.2175	131.662	18	5
1946	4	3	14	16	34.57	31.0415	132.207	119	4.8
1946	4	8	12	23	52.64	33.1773	131.196	12	4.8
1946	5	1	19	1	54.12	31.5772	131.972	22	5.3
1946	5	10	11	12	19.44	31.5492	131.429	4	4.5
1946	5	25	20	41	50.14	31.0065	132.091	72	5.3
1946	5	30	3	34	1.67	33.2125	131.181	12	3.9
1946	6	1	0	0	41.62	32.3828	131.475	64	4.1
1946	6	5	14	3	22.53	33.2018	131.169	7	4.1
1946	6	14	0	50	5.81	33.2238	130.622	0	3.6
1946	6	17	8	17	25.38	32.4218	129.844	0	4.3
1946	6	26	22	19	0.7	32.7967	131.38	126	4.1
1946	7	23	20	7	15.48	33.2562	130.914	1	3.8
1946	8	20	18	42	41.08	33.3517	132.316	42	5.6
1946	8	30	5	50	40.74	31.2338	129.569	0	5.1
1946	9	7	16	31	34.92	31.7532	131.029	7	4.1
1946	9	10	18	43	23.79	33.5365	131.467	0	4.4
1946	12	22	3	41	3.86	32.7025	130.69	7	5
1946	12	23	6	15	11.98	32.9482	130.182	18	4.1
1946	12	25	6	15	33.81	32.5023	132.435	4	4.5
1947	1	7	19	56	10.81	31.7615	128.655	44	4.8
1947	1	10	13	58	28.57	34.8263	130.494	0	4.8
1947	1	10	19	42	37.89	33.2822	130.204	3	3.9
1947	1	13	21	59	29.65	33.1348	130.799	17	3.9
1947	1	19	9	6	1.35	32.568	131.649	22	4.5
1947	3	5	22	14	21.1	32.7063	131.94	0	4.5
1947	3	19	17	36	20.98	32.0103	129.815	9	4.3
1947	4	6	6	30	49.57	35.0192	132.346	11	4.3
1947	4	9	3	13	52.56	31.8798	128.935	14	4.5
1947	4	26	13	59	56.12	32.6772	132.283	0	4.6
1947	5	3	4	16	59.97	31.3022	131.603	0	4.4
1947	5	9	23	5	37.3	33.3722	130.95	7	5.3
1947	5	11	14	0	48.25	33.1253	130.364	14	3.8
1947	5	15	19	54	30.21	32.9363	131.328	14	4.1
1947	8	14	18	49	40.9	31.9978	131.563	46	4.8
1947	8	15	18	12	0.57	31.323	129.032	31	4.5
1947	8	25	18	33	24.89	34.6268	131.75	0	4.5
1947	9	18	2	46	48.83	32.4128	132.413	30	4.5
1947	9	24	8	44	2.78	33.3087	129.06	43	4.2
1947	9	24	18	7	47.27	31.7485	129.355	0	4.7
1947	10	11	2	30	59.19	31.029	131.634	55	5.3
1947	10	11	2	51	28.2	31.1398	131.657	16	5.3
1947	11	26	20	12	42.6	31.9308	131.869	18	4.7
1947	11	27	12	31	47.85	32.5828	129.909	3	4.5
1947	11	28	18	42	27.72	31.0302	131.16	46	4.6
1947	12	25	10	2	25.57	33.67	131.466	81	4.1
1947	12	29	16	17	6.78	31.2745	130.837	139	4.8
1948	1	7	11	45	55.85	33.5977	131.666	79	4.3
1948	1	10	10	58	35.73	32.7868	130.566	10	3.8
1948	1	22	4	22	57.72	31.0273	130.417	155	4.8
1948	2	15	9	19	34.68	32.6895	130.886	19	4.6
1948	3	8	4	53	46.29	31.6138	131.878	0	4.4
1948	4	21	10	52	35.55	32.161	132.08	28	4.6
1948	4	28	22	18	19.74	32.7417	132.262	4	4
1948	5	1	21	35	51.7	31.1242	132.321	14	4.8
1948	5	9	11	9	7	31.552	131.63	25	6.8
1948	5	10	1	5	31.45	32.5292	131.759	0	4.4
1948	5	11	21	0	38.72	32.1302	130.95	90	4.9
1948	6	21	2	15	8.02	32.7767	130.858	16	4.2
1948	6	29	19	14	34.22	33.7957	131.178	12	4.3
1948	7	7	0	27	44.49	32.02	132.321	13	4.5
1948	7	15	4	32	25.72	35.269	131.906	1	4.4
1948	7	15	5	58	17.12	33.3402	130.899	5	4.1
1948	8	2	10	14	33.85	33.2065	129.586	5	4.3
1948	8	4	7	45	51.8	32.8283	131.715	24	4
1948	9	11	17	33	41.98	33.4935	132.1	0	4
1948	9	27	14	47	17.65	32.5482	130.542	16	4.2
1948	10	13	6	47	55.88	35.271	130.801	0	4.1
1948	10	15	0	59	9.11	33.0843	131.48	99	4.9
1948	10	27	4	52	25.05	31.159	131.387	19	5.1
1948	11	2	13	35	48.24	31.866	130.442	0	3.9
1948	11	4	1	0	40.22	32.2695	131.755	40	4.3
1948	11	23	21	45	34.5	33.2387	131.988	81	3.9
1948	12	12	16	24	21.08	31.9817	132.288	23	4.4
1949	1	12	18	57	25.2	32.5232	130.646	0	4.5
1949	1	15	1	3	29.5	32.9175	130.703	0	4.2
1949	3	20	3	19	27.2	31.2757	130.68	165	5.6
1949	4	5	18	27	8	41.643	131.34	574	6.7
1949	4	13	5	22	21.85	32.1352	132.226	0	4.5
1949	6	8	9	49	41.17	31.3845	130.099	168	4.5
1949	6	27	14	19	46.75	32.3167	130.311	29	4.5
1949	8	23	4	1	12.66	32.5203	130.661	0	4.8
1949	8	26	20	0	14.39	32.2845	131.553	7	4
1949	10	3	10	43	40.76	33.8595	132.465	46	4
1949	10	5	2	52	57.81	33.0248	132.015	44	4.7
1949	11	19	13	2	40.72	33.5505	132.282	33	4.5
1950	1	23	20	14	55.49	35.474	131.248	8	4.7
1950	2	8	2	2	3.44	31.157	130.204	138	4.8
1950	3	31	20	14	15.73	32.7675	130.87	0	4.1
1950	4	28	5	15	22.2	33.8393	132.078	44	4.4
1950	4	29	20	29	46.26	33.5023	132.075	6	4.1
1950	5	7	3	17	27.75	31.3838	130.675	164	4.3
1950	5	17	20	46	51	39.31	130.66	579	6.7
1950	5	27	11	50	44.54	33.544	132.07	15	4.2
1950	6	1	1	30	12.79	33.1833	130.611	14	4.3
1950	6	3	6	4	23.14	33.8602	132.249	21	3.9
1950	6	12	22	27	3.25	32.0912	130.981	1	4.5
1950	6	25	16	37	56.73	32.8433	130.655	16	4.2
1950	7	4	10	54	19.15	32.8903	132.274	0	3.8
1950	7	12	1	49	59.57	32.2318	132.282	12	4.3
1950	7	23	14	29	35.42	35.0538	131.126	0	4.4
1950	7	29	5	49	55.73	34.1463	129.924	0	4.1
1950	8	30	4	47	24.9	33.7453	132.348	4	3.9
1950	9	16	21	48	41.55	32.8313	131.393	133	5.3
1950	9	24	1	0	15.91	31.8025	129.12	14	4.8
1950	10	1	8	54	25.28	33.3863	131.976	58	4.1
1950	10	28	3	31	18.41	32.5088	132.199	4	4.3
1950	12	24	14	10	12.29	32.0398	131.724	27	5.2
1951	1	16	22	53	40.11	33.9227	129.431	14	4.1
1951	2	7	4	45	12.66	32.3223	129.874	18	4.3
1951	2	15	16	11	24.19	32.7192	130.168	12	5.1
1951	2	24	19	41	37.24	33.6477	132.031	53	3.9
1951	3	7	0	15	48.78	31.0192	129.321	0	4.6
1951	3	7	0	19	35.31	32.3945	129.77	25	4.3
1951	3	24	9	59	59.99	33.4725	132.178	50	3.9
1951	4	26	3	30	1.65	31.2047	130.359	154	5.2
1951	5	15	9	41	57.89	32.2853	128.627	30	4.4
1951	6	19	3	16	8.71	32.6723	130.103	1	3.9
1951	6	20	17	38	10.42	33.3827	131.487	103	4.2
1951	7	2	23	56	24.56	32.3102	132.383	2	4.2
1951	7	31	4	28	46.37	31.626	131.665	1	4
1951	8	18	0	30	8.22	33.5382	132.368	26	4.2
1951	8	27	12	33	36.86	32.5557	130.268	14	4.2
1951	9	19	9	38	7.62	32.8663	130.746	1	3.9
1951	11	8	16	1	39.45	33.0127	132.425	29	4.1
1951	12	11	18	10	57.35	31.8112	131.952	31	4.3
1951	12	19	20	0	17.21	32.142	131.748	0	4.2
1952	1	30	20	44	18.18	31.0678	131.913	73	4.5
1952	2	7	15	28	53.4	32.5268	131.981	7	4.6
1952	2	8	3	23	55.15	32.6958	129.863	3	3.4
1952	2	14	4	26	24.92	31.6372	131.472	0	3.8
1952	3	19	18	4	18	38.872	125.83	35	6.3
1952	3	19	18	4	51.4	39.436	128.619	0	6
1952	4	14	13	42	14.58	32.539	131.533	160	4.3
1952	5	16	12	37	0.42	32.829	130.859	20	3.7
1952	6	17	10	44	8.9	32.5993	131.165	133	4.3
1952	7	4	6	26	42.92	32.333	131.962	23	4.1
1952	7	26	22	32	51.69	31.0475	130.145	163	5.1
1952	7	27	10	17	51.83	31.3313	130.774	145	4.5
1952	8	5	20	6	11.01	31.337	131.932	20	4.9
1952	9	8	20	46	13.44	33.5945	132.413	14	3.9
1952	9	12	22	0	46.22	32.6475	128.991	10	4.3
1952	9	22	21	32	38.26	31.0978	131.47	0	4.8
1952	10	25	18	7	30.78	33.9052	131.903	4	4
1953	1	18	5	47	36.04	31.9183	132.107	32	5
1953	1	23	11	47	57.35	33.1862	132.129	62	5.2
1953	2	2	16	24	47.01	32.7858	130.478	0	3.4
1953	2	15	7	31	55.24	33.6563	131.783	109	4.3
1953	2	23	19	18	31.67	31.717	131.756	22	4.9
1953	4	13	13	48	25.99	31.2208	131.707	28	4.8
1953	4	19	3	52	20.3	33.8923	132.391	54	4.3
1953	5	1	12	10	48.01	31.0643	131.328	0	4.9
1953	5	24	19	51	37.22	32.9568	130.859	4	4.1
1953	6	8	10	14	49.2	32.3215	132.358	0	4.3
1953	7	18	3	29	38.97	32.8258	130.863	8	4.2
1953	7	22	21	29	35.3	33.028	131.458	119	4.5
1953	8	9	3	51	27.35	32.7217	131.344	116	4.5
1953	10	28	11	8	34.27	31.6888	129.218	5	5.3
1953	10	28	11	20	5.64	31.5637	129.23	14	5.3
1953	11	4	15	5	15.81	39.2938	129.7	598	6
1953	11	14	11	23	24.2	31.2315	131.071	77	4.5
1953	12	29	1	4	19.43	34.5285	132.375	11	4.3
1954	2	24	3	28	19.72	31.9498	130.941	21	5
1954	3	6	0	17	53.48	31.1975	131.388	38	4.7
1954	3	23	14	25	42.96	32.5817	132.086	25	4.9
1954	4	20	10	17	53.52	31.1328	131.336	18	4.5
1954	5	27	15	50	13.84	31.6877	131.765	19	5.2
1954	7	12	4	51	45.5	32.6263	131.177	154	4.6
1954	7	21	17	7	18.75	33.6945	132.398	46	4.5
1954	10	8	16	51	20.83	31.1385	130.62	148	4.7
1954	10	20	2	29	18.7	31.2112	129.933	8	4.8
1954	10	20	19	22	16.44	32.8793	131.99	52	4.3
1954	10	30	13	34	7.14	33.6835	132.317	36	4.1
1954	11	19	14	56	2	40.776	132.05	552	6.3
1955	2	6	12	55	3.39	32.7253	130.146	0	3.6
1955	3	7	6	59	35.69	33.3173	132.112	56	4.1
1955	4	17	10	13	32.63	33.3018	130.097	0	4.6
1955	4	23	15	7	30.63	32.2822	131.93	39	4.3
1955	5	31	23	19	12.11	32.5482	129.87	9	4
1955	10	11	5	35	38.85	31.6315	131.78	19	5.2
1955	10	15	14	12	51.33	32.7997	130.601	2	4.6
1955	11	22	21	10	3.62	32.8403	131.884	51	4.6
1956	1	30	14	45	6.48	33.6782	132.324	53	4.9
1956	3	28	11	41	10.58	32.5732	130.734	8	4
1956	3	28	23	20	22.11	32.861	130.77	10	3.9
1956	4	10	22	8	13.43	32.0442	131.279	60	4.1
1956	8	10	5	35	0.1	32.6203	132.19	0	5
1956	9	7	7	45	29.64	31.0278	131.966	53	5
1956	10	5	19	34	12.83	33.156	131.62	97	4.5
1956	10	12	21	46	38.6	32.6177	130.014	9	3.9
1956	10	16	3	59	28.39	32.7987	130.482	0	3.8
1956	10	24	10	1	30.28	32.0915	132.064	6	4.7
1956	11	2	20	34	22.81	33.7198	132.371	46	4.4
1956	11	20	19	32	26.98	31.4707	132.325	56	4.8
1957	1	9	6	14	29.55	32.7382	130.486	2	3.8
1957	3	19	11	55	1.38	31.959	132.089	7	4.8
1957	4	28	20	5	30.04	32.9245	130.347	12	4
1957	5	30	15	25	44.57	32.5793	130.908	19	4.7
1957	6	25	9	34	17.68	31.7437	131.642	43	4.7
1957	7	9	23	45	40.85	33.1625	131.522	100	4.4
1957	11	4	22	10	50.33	33.5077	132.34	47	4.3
1957	11	11	20	25	12.9	32.6718	131.997	40	4.5
1957	12	25	10	48	17.01	32.6003	129.993	2	3.9
1958	1	7	11	38	35.95	34.5365	131.762	11	4.6
1958	2	8	6	37	13.98	31.4915	132.074	25	5
1958	2	27	10	13	44.3	33.0355	130.432	19	3.8
1958	3	14	15	18	57.06	32.7083	130.826	15	4.5
1958	5	15	5	32	7.94	32.858	132.265	35	4.7
1958	5	26	2	40	51	31.39	129.77	15	5.6
1958	6	15	5	22	28.37	31.703	132.049	15	4.3
1958	6	19	22	49	51	32.9502	130.351	19	4.8
1958	6	25	3	36	39.34	31.2793	131.544	0	4.6
1958	7	13	17	7	49.33	33.813	132.392	54	4.3
1958	9	5	1	2	36.06	31.724	131.714	27	4.8
1958	9	8	23	53	19	33.771	131.83	80	5.5
1958	9	11	4	3	17.14	32.7722	130.125	3	4.3
1958	9	15	4	42	13.51	31.7408	131.987	28	5.5
1958	11	7	3	53	23.07	32.8593	130.144	8	3.6
1958	12	19	1	24	35.61	32.7213	130.107	7	3.6
1958	12	21	4	32	52.71	31.0108	131.517	10	4.8
1958	12	30	19	48	2.63	32.8023	130.805	0	4.1
1959	1	24	3	31	31.97	33.6952	132.283	53	4.3
1959	2	1	6	22	3.68	31.3812	130.494	166	4.8
1959	4	15	7	10	55.29	31.801	129.387	13	5
1959	6	2	9	47	22	31.539	131.85	35	5.8
1959	6	4	15	37	6.16	31.277	131.188	66	4.2
1959	7	1	12	29	46.7	31.0643	131.512	38	4.3
1959	7	7	17	21	53.93	32.9912	130.342	4	4.2
1959	9	19	5	11	59.42	32.8917	130.837	9	4.4
1959	9	19	20	20	33.05	32.5425	129.945	21	3.4
1959	10	3	5	50	18.57	31.7452	129.364	0	5.3
1959	10	29	23	30	27	42.725	131.16	562	5.9
1959	12	7	17	13	7.79	33.8043	132.427	59	4.1
1960	1	19	12	10	54.01	31.9588	131.548	31	4.2
1960	2	5	17	43	35.9	31.8043	132.047	24	5.3
1960	3	4	12	53	11	31.173	130.48	132	6.3
1960	5	2	2	57	50.05	33.1927	130.534	14	4.3
1960	5	11	8	17	59	33.9	131.82	93	4.5
1960	7	2	21	44	22.11	41.2818	132.285	569	5.3
1960	7	30	0	47	22.24	33.0077	130.366	8	4.1
1960	9	4	10	13	27.61	32.0542	132.042	13	5
1960	9	26	20	36	23	32.5	131.9	0	5.3
1960	10	8	14	53	7	40.09	129.89	608	6.3
1960	10	13	21	55	17.25	33.5777	132.333	32	4.3
1960	11	7	22	23	11.12	32.3328	132.15	35	5.3
1961	2	20	23	44	1.85	32.9733	130.36	18	4.3
1961	2	27	3	10	52	31.739	131.48	35	7.5
1961	3	30	2	24	2.88	32.935	131.903	54	4.3
1961	5	3	11	32	3.81	33.0817	130.488	4	4.1
1961	8	1	19	30	2.45	32.975	131.443	122	4.7
1961	8	26	21	28	1.36	32.6433	130.033	9	3.6
1961	10	11	7	40	4.17	33.0217	130.505	8	4
1961	10	13	18	53	0.31	33.4567	132.128	71	4.3
1961	10	15	0	8	9	35.03	131.48	40	4.6
1961	11	9	20	20	4.4	33.11	131.117	4	3.9
1961	12	11	13	57	5.34	32.805	130.747	3	4.1
1962	3	29	12	38	1.03	32.8667	130.822	3	4.3
1962	4	13	15	41	3.69	32.9933	130.358	7	4.3
1962	4	15	19	12	2.41	32.7833	130.863	10	3
1962	4	23	4	15	31	32.16	130.45	171	5.5
1962	4	25	4	9	4.89	32.865	130.723	4	4.1
1962	7	31	14	9	1.8	32.4433	132.45	30	5.2
1962	9	24	19	21	3.4	32.92	131.958	47	4.4
1962	9	25	11	37	1.61	33.8917	131.77	2	4.8
1962	10	10	16	50	1.72	31.09	131.937	19	4.8
1962	12	4	17	16	4	36.1	123.5	33	4.2
1962	12	19	2	42	4.56	32.9567	130.623	1	3.8
1963	1	9	0	46	4.56	31.1883	130.443	159	5.3
1963	1	9	0	46	46	31.27	130.19	177	5.3
1963	1	27	12	52	4.65	34.8567	132.072	30	2.6
1963	2	16	23	54	1.5	32.88	131.987	0	4.1
1963	3	13	18	9	0.47	33.4267	132.407	56	4.3
1963	3	29	17	59	5.76	31.81	129.51	0	4.8
1963	3	31	21	26	5	35.13	132.4	0	5
1963	7	20	10	4	2.42	32.67	129.75	4	4.6
1963	8	28	18	22	0.35	32.835	130.76	9	3.8
1963	9	6	15	3	53	36.341	130.66	20	6.1
1963	9	7	10	16	58	36.383	130.54	27	6.1
1963	9	10	3	10	5.03	32.3533	129.87	8	4
1963	9	19	8	23	5.27	32.8333	130.838	8	4.5
1963	10	19	23	27	5.04	32.0983	131.992	23	4.6
1963	11	19	13	37	5.82	39.54	129.707	587	4.9
1963	11	21	1	57	1.09	31.19	132.207	62	5
1963	11	30	8	26	5.71	32.8867	132.245	69	4.4
1963	12	9	4	23	5.64	32.9817	130.788	10	4.3
1963	12	10	9	56	0.9	32.0867	131.893	0	4.8
1963	12	11	18	22	3.22	31.33	130.455	158	4.6
1963	12	16	16	59	4.74	31.9033	131.898	50	4.8
1963	12	20	21	55	1.21	31.135	131.205	77	4.8
1964	1	2	20	36	16.44	33.0377	130.407	26	4.1
1964	1	5	18	18	15.3	32.5897	132.283	30	4.2
1964	1	25	2	17	49	38.676	129.58	573	5.5
1964	3	3	22	38	19.33	32.8387	130.859	4	3.6
1964	3	12	3	23	20	31.96	132.4	21	5
1964	4	12	21	14	54	33.495	132.06	68	4.9
1964	4	29	11	11	36	32.147	129.1	13	5.1
1964	10	2	10	24	42	31.309	130.57	155	4.6
1964	10	11	18	18	30.43	31.9348	130.275	4	4.6
1964	10	17	15	34	50	42.414	130.89	500	4.6
1964	10	27	11	8	3.48	32.5668	132.307	2	4.3
1964	11	1	3	43	57.49	32.2468	131.96	0	4.5
1964	11	8	20	42	23.47	32.0698	131.629	32	4.5
1964	11	14	12	56	7	33.468	132.08	70	5.8
1964	12	2	3	38	3.85	33.0217	130.373	9	4.1
1964	12	12	1	5	0	38.845	130.31	556	5.5
1965	1	3	13	26	46	31.5	129.8	20	4.5
1965	1	5	4	40	2.58	31.025	129.893	77	4.5
1965	1	6	23	14	20.83	32.0835	131.23	0	3.9
1965	1	28	19	42	34.68	32.9258	130.798	8	3.8
1965	2	7	0	7	0	33.1	130.4	0	4.2
1965	2	7	1	12	40.16	31.4953	131.992	28	4.1
1965	2	11	13	31	28.99	32.8998	130.414	0	3.8
1965	2	19	13	34	3	31.725	131.76	31	4.5
1965	2	27	5	29	17.32	31.934	131.079	0	4.1
1965	3	4	12	36	35.64	31.2605	131.604	0	4.3
1965	3	24	12	51	45	33.2	130	40	4.3
1965	3	28	17	41	9	31.667	131.69	24	5
1965	4	21	20	30	43.54	31.495	132.144	53	4.5
1965	4	22	7	20	30.25	32.1093	129.442	0	4.1
1965	4	26	12	7	22	32.8	130.7	20	4.1
1965	4	28	20	24	11.82	32.2277	129.821	2	4.2
1965	4	28	20	26	22	32.2	128.7	0	4.4
1965	4	28	20	26	25.69	32.242	129.804	14	4.3
1965	4	28	20	29	2.33	32.2582	129.707	14	4.3
1965	4	28	21	11	26.61	32.2978	129.832	0	4.3
1965	6	4	21	3	33.51	33.104	130.488	22	3.9
1965	6	12	15	19	22	41.849	131.45	500	4.7
1965	6	14	3	22	13.64	32.8792	130.557	8	3.8
1965	7	5	3	19	59	32	132.1	0	4.5
1965	7	11	11	30	0	32.4212	131.617	40	4
1965	7	12	7	48	39.38	32.4128	130.877	1	3.9
1965	7	13	23	3	42	33	130.4	20	4.1
1965	7	27	5	32	0.6	31.0008	131.567	0	4.3
1965	8	2	3	18	35.88	32.2688	131.307	73	3.9
1965	8	7	3	15	12	41.32	131.37	568	5.3
1965	8	28	0	14	11	33.1	130.4	20	4
1965	8	28	11	24	22.35	31.2367	130.626	162	4.3
1965	9	6	17	21	45.29	31.0422	131.568	18	4.4
1965	9	22	21	49	47	31.984	131.77	30	5.5
1965	9	25	0	10	44	32.1	129.4	20	4.7
1965	10	9	7	53	19.94	32.6637	130.999	6	3.6
1965	10	10	5	11	0.06	33.0237	130.514	2	3.6
1965	10	16	0	32	1.69	31.4138	131.572	38	4.3
1965	10	16	18	9	40	33.1	130.4	20	4.2
1965	11	4	13	34	43.81	31.282	128.861	23	4.5
1965	11	7	17	29	28.82	32.428	131.798	16	3.9
1965	11	14	9	3	35	33.017	130.93	3	4.7
1965	11	30	8	40	46.14	33.0788	130.214	22	3.9
1965	12	8	14	25	12	32.582	130.58	9	4.8
1965	12	17	0	49	28.92	31.3665	131.754	60	4.1
1965	12	18	21	25	26.1	34.5657	131.87	3	4.3
1965	12	24	5	41	58.23	33.046	130.216	26	4
1966	1	1	18	58	28	31.036	131.4	32	4.6
1966	1	15	3	8	31.54	32.9518	129.932	25	3.9
1966	1	24	17	27	4.1	33.0478	130.347	0	3.7
1966	2	6	17	53	16.96	35.298	131.997	0	4.2
1966	2	22	11	38	45	31.344	130.07	10	5.1
1966	2	24	0	53	51.3	33.1922	130.595	24	3.9
1966	2	24	8	10	8.89	32.5718	131.58	60	4.4
1966	2	28	3	22	54.84	32.9913	130.312	3	3.8
1966	2	28	16	39	46	31.163	130.42	150	5.1
1966	4	10	0	24	54.47	32.6822	131.807	36	3.9
1966	4	26	3	17	35	33	130.2	20	4.4
1966	4	29	1	22	44	32.992	131.99	56	4.2
1966	5	7	7	41	3.87	32.7295	131.154	154	4.3
1966	5	9	17	46	7.16	33.1885	130.571	0	3.8
1966	5	27	14	39	1	32.2	131.3	0	4.3
1966	5	28	6	35	29.19	32.467	132.229	23	4.2
1966	6	5	16	4	14.08	33.5697	131.708	99	4.1
1966	6	11	20	34	31	32.9255	130.68	11	4.1
1966	6	23	5	15	38.82	33.815	131.883	73	3.9
1966	7	10	13	11	59.9	32.5978	131.75	24	3.9
1966	7	17	2	55	3.37	32.7498	129.964	8	4
1966	8	1	8	2	14	33	130.2	0	4.1
1966	8	2	19	48	15.52	32.565	130.667	12	3.8
1966	8	4	4	1	25	31.254	131.72	28	4.8
1966	8	12	2	9	23.57	31.1605	131.259	25	4.5
1966	8	18	15	49	41	32.9	130.1	0	4.3
1966	8	25	9	32	50	32.181	132.28	24	4.6
1966	9	25	3	22	30	32.4848	131.478	0	3.9
1966	11	1	20	32	13	31.476	131.67	33	4.8
1966	11	2	9	21	56	31.108	131.25	52	5
1966	11	5	15	43	4.53	33.3065	132.169	13	3.9
1966	11	12	21	1	44	33.033	130.25	14	5.4
1966	11	23	5	57	8.96	32.6097	131.676	0	3.9
1966	12	5	16	23	5	32.208	131.78	24	4.9
1966	12	29	20	42	17	32.11	132.4	26	4.4
1967	1	19	12	59	57.28	32.704	132.132	32	4.1
1967	1	30	18	16	1.3	31.943	132.075	31	4.3
1967	2	1	20	3	42	33.3	132.3	40	4.2
1967	2	3	7	16	43	33.6	132.1	30	4.1
1967	2	4	1	22	52.84	32.593	132.199	26	3.9
1967	2	16	22	18	14.49	34.6817	131.996	10	3.4
1967	2	17	16	12	53	32.799	130.84	12	4.1
1967	2	20	14	26	36.08	31.591	132.039	0	4.1
1967	2	20	20	56	51	35.231	128.91	10	4.8
1967	3	2	12	25	25.67	31.0108	131.594	16	4.8
1967	3	21	1	13	51.42	31.2008	130.753	172	4.1
1967	4	8	20	51	1.77	31.5248	131.937	10	4.1
1967	4	12	5	7	14.91	33.3542	130.9	7	3.7
1967	4	25	0	12	50	42.312	131.2	534	4.9
1967	5	17	9	26	25.7	33.7638	132.462	52	4
1967	6	24	18	25	40	34.595	122.5	35	4.7
1967	7	3	5	34	38	31.216	130.28	182	5.4
1967	7	7	8	15	58	32.571	131.13	157	5.2
1967	7	7	10	24	27.44	31.9443	132.401	19	4.2
1967	7	8	6	11	40.55	32.3452	130.393	6	3.9
1967	7	13	0	55	46	32.7	132.1	0	4.1
1967	7	13	1	4	21.26	32.8895	130.626	0	3.6
1967	8	16	18	42	57.12	31.9383	129.305	10	4.3
1967	8	21	15	27	4	31.454	131.74	33	4.6
1967	8	23	2	33	34.29	33.0043	130.294	3	3.7
1967	10	1	19	10	17	33.09	130.34	18	3.8
1967	10	10	19	59	35.58	31.9297	131.875	32	4.1
1967	10	26	6	14	22	33	130.3	20	3.8
1967	10	31	5	48	47	32.9	132	0	4
1967	11	7	9	6	10	33.439	130.88	10	4.2
1967	11	16	5	52	0	32.277	129.75	6	4.7
1967	11	18	22	39	6	32.5	132.1	0	4.3
1967	11	20	2	9	54.82	33.0675	130.468	2	3.7
1967	11	28	11	36	56	32.151	130.84	129	5.7
1967	12	18	23	59	0	32.1	131.9	10	4.2
1967	12	19	3	12	25.27	33.135	130.458	0	3.8
1968	1	9	23	47	14	32.4808	132.31	0	4.3
1968	2	3	21	11	5.55	32.9657	130.25	25	4.3
1968	2	12	16	32	2.34	33.5528	132.116	69	4.1
1968	2	22	6	23	10.47	31.2013	130.642	165	4.3
1968	3	26	16	32	59.22	32.056	131.957	33	4.2
1968	3	29	11	9	26.2	32.9778	130.23	18	3.8
1968	3	30	3	48	43.06	31.1428	130.784	0	3.9
1968	3	30	20	7	29.58	31.1345	130.739	1	4
1968	4	1	9	42	5	32.499	132.31	26	6.4
1968	4	1	20	7	51.16	31.0508	132.063	3	4.4
1968	4	5	2	22	37.61	32.0742	130.86	0	4.2
1968	4	6	17	15	51.14	31.9583	132.119	45	4.1
1968	4	11	15	46	31	42.328	131.19	552	5.2
1968	4	15	11	19	51.13	32.1803	130.93	0	4.2
1968	4	16	22	4	11.37	32.9852	130.316	2	3.6
1968	4	20	18	48	55.52	31.0092	131.883	0	4.6
1968	5	1	21	54	38	32.106	130.74	10	4.7
1968	5	4	7	44	48.99	32.7242	130.773	12	4
1968	5	12	17	14	39.25	33.4038	132.006	78	4.1
1968	5	19	20	8	58.73	31.3738	131.551	28	4.2
1968	5	19	21	5	29.15	31.2437	132.004	25	4.8
1968	5	26	4	8	41.47	32.2397	131.542	0	3.8
1968	5	29	3	51	18.09	31.5568	130.659	11	4.2
1968	5	30	20	41	55.62	32.0935	130.834	0	4.3
1968	6	15	13	21	23.65	31.6397	130.631	0	4.1
1968	7	5	12	50	23.63	32.0388	130.816	0	4.3
1968	7	16	22	9	18	32.2	131.6	0	4.5
1968	7	30	11	41	13.92	32.0967	130.851	0	3.8
1968	8	6	1	17	7	33.25	132.22	48	6.4
1968	8	10	15	57	34.5	32.7388	130.038	0	4.1
1968	8	12	18	40	23.4	33.041	130.309	14	3.9
1968	8	13	20	22	13.98	32.0663	130.689	0	4.4
1968	8	13	21	39	20.6	32.6722	130.019	10	4.6
1968	8	20	14	41	43.84	31.6873	131.988	10	4.5
1968	9	5	16	39	44.1	31.133	130.358	168	4.3
1968	9	7	4	22	49	31.035	131.88	31	6
1968	9	28	19	48	43	32.316	132.18	26	4.6
1968	10	5	2	40	9.98	32.236	131.209	85	3.8
1968	10	21	12	37	55.26	33.9962	131.873	6	4.1
1968	10	21	21	5	18.46	32.9582	130.226	24	3.9
1968	10	30	3	58	44.93	32.4282	131.047	127	3.9
1968	11	2	16	16	14.72	32.864	130.768	0	3.9
1968	11	11	21	27	54.7	32.9827	130.26	22	3.9
1968	11	14	21	11	56	31.616	131.72	34	5.4
1968	11	19	1	19	42.36	32.2867	131.673	40	4
1968	11	29	9	19	43.1	32.5562	132.387	31	4.1
1968	12	9	23	27	59.34	32.7062	130.055	3	3.6
1968	12	13	8	54	19.6	32.9633	130.226	28	3.8
1968	12	25	21	35	37.25	31.1712	130.41	162	4.1
1969	1	1	9	18	22.53	32.3373	132.126	0	4.2
1969	1	6	14	41	10.8	32.7155	130.752	9	3.8
1969	1	8	12	28	1.92	31.4695	132.263	36	4.6
1969	1	8	18	36	20.34	32.9797	130.287	11	4.1
1969	1	26	8	39	12.63	32.078	130.826	0	4.1
1969	1	28	16	10	17.81	33.7832	132.451	46	3.7
1969	1	30	7	15	35	32.637	132.21	36	4.9
1969	2	5	15	9	17.26	32.9995	130.278	10	4.2
1969	2	8	15	28	23	31.502	129.04	11	4.9
1969	2	13	1	42	13.49	31.0183	130.648	131	3.9
1969	2	14	21	42	9.79	32.684	130.079	5	4.3
1969	2	14	21	47	26.53	32.6683	130.081	0	4.3
1969	3	19	21	32	30.15	32.1243	132.16	0	4.1
1969	3	22	22	14	3.01	32.9823	130.29	13	3.9
1969	3	26	3	58	4.12	32.551	132.343	10	3.8
1969	3	26	5	24	47	32.173	131.89	32	4.9
1969	4	10	23	54	6	42.055	131.17	563	5.5
1969	4	17	19	18	50.44	31.5738	131.934	25	4.4
1969	4	21	16	19	27	32.152	132	26	6.3
1969	5	2	2	1	7.75	32.8872	130.726	13	3.9
1969	6	4	17	37	13.73	33.024	130.365	17	3.8
1969	6	21	18	24	39.81	32.3123	130.57	0	4.2
1969	6	27	0	46	36	42.309	131.06	550	4.9
1969	6	28	3	31	44.33	33.0518	130.25	0	3.6
1969	7	9	3	48	5.39	31.0025	130.471	122	4.1
1969	7	27	4	36	44	32.766	130.21	8	4.6
1969	8	16	12	31	53.25	31.4735	131.798	5	4.2
1969	9	3	4	13	30.4	32.5452	129.971	15	4.1
1969	9	4	7	9	26	32.966	131.44	109	5.2
1969	9	7	11	40	42.4	33.0238	130.409	16	3.8
1969	9	11	11	19	20.66	33.3378	130.408	12	3.9
1969	9	18	3	40	51	31.075	131.55	28	6.3
1969	9	21	7	29	37.86	31.083	130.356	140	4.1
1969	9	24	0	9	18.92	32.701	130.004	13	4.3
1969	9	24	8	36	28.67	32.0288	132.205	0	4.1
1969	9	29	23	54	47.73	31.3807	129.627	3	4.3
1969	10	3	16	35	46	31.735	131.26	33	4.9
1969	10	17	19	39	10.66	31.0995	130.276	165	4.1
1969	10	29	20	3	36.64	33.0155	130.491	8	3.8
1969	11	2	12	42	44.8	31.0445	130.723	170	4.2
1969	11	13	2	5	21.08	32.9192	130.318	15	3.8
1969	11	15	10	29	48.77	32.5843	131.221	95	3.9
1969	11	16	19	56	3.52	33.0763	130.478	6	3.6
1969	11	27	9	30	58.29	33.9843	128.013	5	4.9
1969	12	4	20	24	11.18	33.0983	130.479	23	3.9
1969	12	8	2	59	5.03	32.112	130.97	120	3.9
1969	12	12	0	0	23.92	32.733	129.969	8	4.1
1969	12	16	3	8	3.63	32.7355	129.906	12	4.2
1969	12	27	7	28	16.74	32.7212	130.795	8	3.9
1970	1	1	15	18	14.82	32.231	131.843	30	4.1
1970	1	3	3	57	29.86	32.741	130.772	6	3.9
1970	1	18	12	21	23.22	32.9603	130.274	1	4.3
1970	2	3	16	22	33.34	32.0782	132.266	6	4.5
1970	2	12	18	43	17.44	36.5305	127.638	54	4.8
1970	3	4	9	1	49.57	33.0115	130.343	2	4.1
1970	3	6	8	44	27.4	33.8067	132.227	50	4.1
1970	3	18	2	7	15	31.405	130.76	124	5.3
1970	4	7	4	29	58.95	32.8818	130.755	13	3.7
1970	4	22	9	26	2.66	33.0583	130.435	1	3.7
1970	4	28	1	5	17.81	32.0412	132.04	5	4.3
1970	4	28	1	50	26.25	32.0163	132.002	10	4.3
1970	5	13	17	19	36.92	32.0722	132.221	23	4.3
1970	5	31	8	10	9.69	31.6907	131.969	16	4.1
1970	6	3	20	11	45.05	32.726	130.206	9	4
1970	6	14	12	3	12	31.919	130.39	11	5.5
1970	6	22	11	30	22	31.669	130.84	35	4.9
1970	6	24	7	23	37.85	31.113	130.494	153	3.9
1970	6	27	18	36	45.82	31.188	130.866	86	4.2
1970	7	10	9	13	29	32.74	130.18	13	4.5
1970	7	12	14	35	28.57	31.6705	131.915	0	3.9
1970	7	26	7	41	13	32.155	131.81	35	6.3
1970	7	26	9	30	51	31.572	132.05	31	4.3
1970	8	3	15	52	33	31.193	131.82	29	4.7
1970	8	9	6	55	46	32.72	130.82	10	4.5
1970	8	10	0	28	35	32.8	130.18	0	4.3
1970	9	14	20	15	54	40.757	131.74	560	4.9
1970	9	21	14	8	19	31.169	131.71	32	4.7
1970	9	26	15	55	45.12	34.2413	132.338	10	3.6
1970	10	12	18	33	38	42.807	131.09	558	5.5
1970	10	26	5	33	9.16	31.1123	130.417	157	4.3
1970	11	8	22	38	55	41.792	131.46	500	4.3
1970	11	21	1	53	0.98	33.0963	131.613	79	4.1
1970	12	10	4	33	0	31.154	130.47	170	5.1
1970	12	13	18	54	1	33.12	130.38	20	4.2
1970	12	19	17	23	10	32.63	132.33	20	4.1
1970	12	20	18	30	50	33.43	132.2	40	4
1970	12	31	12	18	59	33.75	132.32	60	4
1971	2	9	11	13	45.77	31.513	131.326	56	3.9
1971	2	15	11	57	39	32.724	130.06	10	4.9
1971	3	7	7	14	49	33.45	130.43	20	4.3
1971	3	18	19	35	54.03	32.5467	131.139	139	4.4
1971	3	24	13	40	16	32.78	130.77	10	4.3
1971	3	25	20	56	51	33.07	132.38	50	4.3
1971	4	29	15	25	54.81	33.5443	131.781	90	4
1971	5	15	4	28	7	32.12	129.87	10	4.1
1971	5	15	13	22	7	34.82	132.22	0	4.4
1971	5	16	6	6	38	33.24	132.31	41	5
1971	5	16	7	11	11	31.228	130.11	155	5.3
1971	5	23	8	34	58	34.22	131.72	10	4.1
1971	5	25	22	0	20	31.372	131.45	33	5.9
1971	5	29	17	52	44	31.378	131.37	33	5.9
1971	6	2	19	14	33	32.972	130.35	12	4.5
1971	6	12	10	57	42	32.819	131.89	59	4.4
1971	6	16	13	12	4.93	31.4988	131.951	11	4
1971	6	22	0	18	7	32.72	132.28	0	3.9
1971	6	24	4	52	36.5	32.221	131.057	123	4.1
1971	6	24	12	35	40	33.42	131.97	60	4.1
1971	8	2	22	59	33.67	31.3903	130.533	159	4.2
1971	8	3	1	56	40	35.385	123.91	35	5.6
1971	8	10	9	43	55	31.292	132	29	4.9
1971	8	11	5	40	36	33.651	132.23	49	4.3
1971	8	15	15	47	59	31.335	128.87	10	4.9
1971	9	10	0	11	16.71	32.1275	131.008	2	3.6
1971	9	11	5	35	59	33.053	129.85	2	4.4
1971	10	11	20	28	49	33.727	131.95	68	4.4
1971	10	19	0	23	23.05	33.4485	132.098	69	4.4
1971	10	22	21	28	4.06	31.1478	129.799	0	4.1
1971	10	25	17	48	37.38	34.0447	132.223	65	3.9
1971	11	7	3	15	25	32.45	129.73	10	4.4
1971	11	11	19	17	38.27	31.3435	130.501	155	4.3
1972	1	12	23	22	10	33.05	131.18	10	4.3
1972	1	18	4	7	59	33.1	132.1	10	4.4
1972	1	20	17	32	57	33.52	132.28	40	4
1972	2	1	6	4	0.74	31.6375	130.726	122	3.8
1972	2	21	22	48	11.4	31.4013	131.945	21	4.1
1972	2	24	7	25	26	32.68	132.43	10	4.1
1972	3	22	17	10	39	32.45	129.95	0	4.3
1972	3	23	0	6	53	32.78	132	30	4
1972	4	14	4	43	55.98	33.2563	131.297	0	4
1972	4	24	1	41	28.46	32.5582	132.435	16	4
1972	5	12	3	33	32	33	130.58	20	4.1
1972	5	16	20	26	36	34.65	131.97	10	4.2
1972	5	18	13	20	19	34.18	132.17	10	3.9
1972	5	27	22	55	15	36.684	123.74	35	5
1972	6	3	16	44	57.71	32.7822	130.213	8	3.7
1972	7	5	22	28	30.42	31.0042	130.923	102	3.8
1972	9	3	1	31	39	33.62	130.17	20	4.1
1972	9	6	20	42	25	32.787	130.43	11	5
1972	10	1	2	27	30.87	31.2647	132.071	17	4.1
1972	10	21	22	4	45	32.67	129.9	10	4.2
1972	11	2	19	57	18	32.7	129.9	10	4.5
1972	11	9	5	41	34	33.446	132.44	33	4.4
1972	11	18	3	55	36	32.78	131.25	10	4.1
1972	11	29	16	52	23	34.65	132.3	20	4.1
1972	12	2	23	31	4.58	33.565	131.874	86	4.1
1972	12	4	7	8	36	31.919	131.76	28	5.4
1972	12	10	22	41	37	32.42	131.68	20	4.1
1973	2	25	19	9	45	34.732	132.38	5	4.6
1973	2	26	22	38	13	33.693	132.31	43	4.4
1973	3	3	8	20	3.21	35.0437	131.993	17	4.1
1973	5	24	19	42	5	33.146	131.44	121	4.1
1973	6	18	18	58	25.41	31.0627	131.567	0	4.1
1973	6	21	15	42	51.76	32.0812	130.078	2	4
1973	7	3	19	57	9	31.007	130.47	148	5.2
1973	7	7	16	48	18.02	32.6972	130.747	9	3.9
1973	7	9	14	14	12.7	31.5407	129.069	13	4.4
1973	7	26	23	45	51	32.062	131.07	110	4.4
1973	8	10	18	26	50.78	32.7928	130.236	4	3.9
1973	8	14	2	48	54	32.57	131.93	29	4.2
1973	8	25	7	18	0	33	130.25	0	4.2
1973	8	30	19	41	28	32.451	130.26	13	4.5
1973	9	2	5	37	26	33.424	130.55	13	5.1
1973	9	9	4	29	47	33.557	132.28	45	4.7
1973	9	22	0	24	29.62	31.9648	132.181	12	4.1
1973	9	29	9	44	2	41.955	131.01	578	6.6
1973	10	13	13	23	16	31.77	131.9	0	4.1
1973	11	15	15	18	52	33.28	132.2	30	4.1
1973	11	16	3	2	51	33.557	131.84	87	4.1
1973	11	19	0	53	3	31.88	129.15	23	5
1973	12	3	8	26	31.1	33.723	130.606	19	3.7
1973	12	11	14	51	57	33.73	132.23	40	4.3
1973	12	27	13	19	18	33.3	132.38	30	4
1973	12	31	1	25	41	32.12	132	40	4.3
1974	1	1	6	28	8	33.12	130.48	0	4.2
1974	1	4	3	30	35	32.915	132.25	35	4.1
1974	1	7	0	57	21	32.73	130.2	10	4.1
1974	1	11	1	13	27	31.868	131.76	33	5.4
1974	1	20	15	38	53	33.356	132.34	47	4.4
1974	1	31	16	3	59	31.815	131.91	32	6
1974	2	4	8	35	3	32.93	130.9	20	4.4
1974	2	11	20	17	32.28	32.9187	130.925	0	4.5
1974	3	26	14	9	15	32.756	130.42	11	4.3
1974	4	18	18	42	42	32.78	131.7	60	4.2
1974	4	22	19	27	1	33.386	131.98	59	4.1
1974	5	17	20	25	39	31.185	131.52	32	4.4
1974	5	31	21	7	49	31	131	0	4.2
1974	6	8	4	23	35.26	31.0607	131.521	55	4.4
1974	6	12	5	1	8	32	129.73	0	4.3
1974	6	27	13	49	18	32.306	132.07	39	5.3
1974	6	29	9	34	59.25	31.0918	131.431	53	4.1
1974	6	30	13	49	6	32.73	130	0	4.3
1974	7	7	5	13	1	33.572	132.32	54	5.3
1974	7	19	14	8	1.28	32.567	129.892	11	4.2
1974	8	3	5	15	31.04	31.3552	130.602	165	4.1
1974	10	11	3	4	40	33.033	130.23	13	4.4
1974	11	25	23	39	29	33.042	131.48	112	5.1
1974	12	21	10	8	10	31.167	131.41	29	4.8
1974	12	22	13	46	20	41.349	123.52	10	5.4
1975	1	15	11	10	1.27	31.203	130.379	175	4.2
1975	1	22	13	40	51	33.036	131.12	2	4.3
1975	1	22	19	8	28	33	131.12	0	4.3
1975	1	23	20	59	0	33	131.13	0	4.5
1975	1	23	23	19	17	33.008	131.11	10	5.5
1975	2	4	20	36	7	40.661	122.68	16	6.3
1975	2	4	22	40	10	39.913	122.75	35	5.1
1975	2	5	18	45	21	32.75	130.1	10	4.1
1975	2	9	16	10	6.67	31.1838	131.663	56	4.3
1975	2	21	18	34	56.88	31.9552	130.213	0	3.9
1975	2	23	8	43	51	32.08	132.18	0	4.3
1975	2	25	5	52	12	42.356	123.07	10	4.9
1975	3	7	2	0	30	32.93	130.95	10	4
1975	3	8	0	7	46	33.02	131.1	10	4
1975	3	25	16	1	5.85	31.8322	132.038	39	4.2
1975	4	13	4	3	6.74	31.3693	132.042	104	4.1
1975	4	20	22	42	56	33.977	129.32	15	5.3
1975	4	20	22	42	57.75	31.2308	130.426	161	4.2
1975	4	21	2	35	52	33.139	131.32	6	5.8
1975	4	25	14	11	15.63	31.468	131.994	25	4.1
1975	5	3	19	15	51.71	31.0375	130.417	148	4.1
1975	5	7	19	33	57.29	31.372	130.461	168	3.9
1975	6	5	21	18	40	34.742	131.91	15	4.9
1975	6	18	0	18	39	33.261	131.92	67	5
1975	6	23	0	42	52	31.77	131.85	20	4.4
1975	6	23	21	24	36.77	31.0008	130.53	142	4.1
1975	6	27	6	5	18	32.773	132.14	30	4.3
1975	6	29	19	37	42	38.769	130.07	562	6.3
1975	7	6	17	56	52	32.77	130.8	10	4.3
1975	7	8	9	42	26	32.95	130.33	10	4.1
1975	7	10	18	6	45.58	31.9995	129.865	0	4.1
1975	7	26	8	27	50	32.55	132.2	20	4.4
1975	7	28	2	16	43	32.936	131.32	128	5.1
1975	8	1	6	12	42	31.033	131.72	14	4.6
1975	8	8	3	11	40	33.863	132.2	60	5.3
1975	8	26	17	13	11.31	31.97	132.298	7	4.2
1975	8	28	23	5	8	40.596	122.29	35	5.1
1975	9	17	14	51	15	33.23	132.27	40	4.1
1975	9	18	17	38	45	32.048	132.18	8	4.6
1975	9	30	8	21	17	33.02	131.03	0	4
1975	9	30	11	16	49.37	31.9823	130.794	16	3.9
1975	10	1	7	49	11.82	32.0563	130.847	0	3.8
1975	10	9	6	47	58	32.55	131.03	165	5.1
1975	10	17	11	33	33	32.07	130.87	0	4.3
1975	10	28	13	54	48	32.12	130.13	0	4.2
1975	11	2	13	5	4.62	33.089	130.405	18	4
1975	11	7	19	3	41	31.036	131.48	42	4.8
1975	11	28	4	20	21.04	33.1008	130.409	17	3.9
1975	12	10	13	40	31	32.3	132.25	10	4.3
1975	12	11	10	17	53	31.19	132.39	19	5
1975	12	16	7	31	5	32.95	129.9	20	3.8
1975	12	28	11	34	18	32.989	132.26	34	5.2
1976	1	6	16	1	11	32.97	130.92	0	4.3
1976	1	14	4	26	55	31.302	132.43	19	5
1976	1	29	7	22	21	32.97	130.73	0	4.1
1976	2	6	21	23	14	32.78	130.82	10	3.9
1976	3	4	13	52	30	32.398	131.24	106	5.2
1976	3	13	8	22	44	32.65	132.15	20	4.2
1976	3	16	9	38	22	33	131.12	0	3.8
1976	3	19	5	8	17	33.32	132.35	30	4
1976	3	26	23	29	15	33.12	130.47	10	4.2
1976	4	11	22	3	39	42.809	131.24	557	5.3
1976	4	12	15	12	21	33.444	132.28	41	4.5
1976	4	22	12	32	16	31.7	131.97	20	4.1
1976	4	23	20	27	5	33.05	131.08	10	3.9
1976	5	12	13	18	23	31.98	130.03	0	4
1976	5	18	11	17	44	31.457	129.59	10	4.4
1976	5	28	20	33	26	33	130.48	20	3.9
1976	6	17	15	24	4	32.57	129.8	0	4.1
1976	6	18	12	45	54	33.08	130.53	10	3.8
1976	6	23	3	22	37	32.73	130.18	10	4.3
1976	7	5	17	16	12	33.13	130.47	20	3.9
1976	7	6	19	58	22	32.083	132.19	10	4.5
1976	7	23	10	2	22	31.131	130.5	161	5
1976	8	11	6	51	4.28	32.9167	130.683	10	4.5
1976	8	11	6	51	43	32.92	130.68	10	4.5
1976	8	16	14	59	3.64	31.5167	131.867	20	4.1
1976	8	16	14	59	36	31.52	131.87	20	4.1
1976	8	31	23	53	5	32.446	131.61	19	4.8
1976	9	3	14	33	14	33.12	131.2	0	3.9
1976	9	8	10	15	2	32.33	129.67	10	4.2
1976	9	28	2	32	4.17	32.6333	130.833	10	4.5
1976	10	6	10	1	11	35.229	124.19	16	5.5
1976	11	3	10	20	26	32.98	130.22	10	3.6
1976	11	19	14	41	4.74	31.8667	132	0	4.4
1976	11	19	14	41	47	31.87	132	0	4.4
1976	11	24	15	13	20	32.45	129.87	10	4.1
1976	11	26	0	34	15	32.78	130.8	10	3.9
1977	1	4	11	6	27	41.084	131.6	530	4.5
1977	1	5	20	0	45	33.07	130.78	10	3.9
1977	1	6	5	52	41	33.2	132.08	40	3.9
1977	1	9	10	15	17	33.6	132.28	30	3.7
1977	1	15	9	40	4.97	31.4833	131.917	40	4.5
1977	1	15	9	40	50	31.48	131.92	40	4.5
1977	1	20	21	45	47	33.13	132.03	30	3.6
1977	1	24	21	50	1.74	32.9667	131.433	100	3.4
1977	2	4	6	31	52	42.846	131.18	549	5.2
1977	2	19	16	21	12	32.7	129.98	10	3.8
1977	2	20	11	30	15	32.65	132.18	30	3.9
1977	2	22	14	6	4.17	32.1667	129.8	0	4.3
1977	2	22	14	6	42	32.17	129.8	0	4.3
1977	3	3	4	5	7	31.22	131.8	70	4.1
1977	3	3	18	18	8	33	130.68	10	3.9
1977	3	9	23	27	5.69	41.6667	131.417	600	6.5
1977	3	10	7	31	53	32.72	132.08	50	3.9
1977	3	13	22	2	18	33.301	132.4	41	4.9
1977	3	16	15	4	41	31.88	131.98	10	3.9
1977	3	17	20	53	7	33.02	130.22	50	3.9
1977	3	25	1	32	7	31.25	130.58	40	4.1
1977	3	27	5	59	49	32.12	130.85	0	3.9
1977	3	27	11	48	59	32.73	132.13	40	3.9
1977	3	27	22	23	4.58	32	130.117	10	3.9
1977	3	27	22	23	46	32	130.12	10	3.9
1977	3	29	16	34	5.37	33.7333	131.817	80	4
1977	3	29	16	34	54	33.73	131.82	80	4
1977	4	3	12	27	23	31.25	131.75	0	4.1
1977	4	4	3	18	59	32.5	130.52	10	3.8
1977	4	4	23	26	27	32.83	130.58	10	4.3
1977	4	11	2	54	5	32.78	130.78	10	4.3
1977	4	12	0	15	27	33.08	130.57	20	3.8
1977	4	12	19	38	50	31.814	131.79	32	5.5
1977	4	24	4	48	5.21	33.6833	131.833	70	3
1977	4	30	8	4	23	32.83	130.62	10	3.9
1977	4	30	15	37	11	32.92	130.98	10	3.8
1977	5	2	6	50	41	33.82	132.2	50	3.8
1977	5	4	15	57	8	33.22	131.35	10	3.7
1977	5	8	10	27	37	33.85	131.95	60	3.8
1977	5	9	5	48	29	33.03	130.27	0	4.1
1977	5	10	16	5	15	34.2	131.58	10	3.8
1977	5	11	0	22	7	32.97	130.75	0	4.1
1977	5	11	2	16	4.48	33.4333	131.767	80	2.9
1977	5	11	9	14	49	33.07	130.13	10	3.6
1977	5	20	1	28	9	32.95	132.07	50	4.1
1977	5	22	0	26	16	33.02	131.07	0	3.9
1977	5	23	4	36	31	32.93	130.77	10	3.9
1977	5	23	10	5	17	33.02	131.05	10	3.9
1977	5	23	12	50	6	32.95	130.75	0	3.9
1977	5	24	17	17	49	33.43	132.17	60	3.7
1977	5	25	6	50	30	31.003	131.65	32	4.6
1977	5	25	9	14	20	33.03	130.73	10	3.9
1977	6	1	11	48	1.28	32.6	131.233	150	3.8
1977	6	4	12	14	36	32.17	132.1	30	3.9
1977	6	4	23	45	4.04	32.4833	129.75	0	4.3
1977	6	4	23	45	40	32.48	129.75	0	4.3
1977	6	7	4	59	0	31.881	129.06	7	4.4
1977	6	16	16	13	23	32.83	130.77	10	4.3
1977	6	28	11	46	4.29	32.9	130.717	10	5.1
1977	7	13	3	51	33	33.03	132.3	50	3.9
1977	7	26	15	58	2.81	31.2833	130.95	170	3.8
1977	7	31	15	30	4.96	32.2833	131.383	70	4.1
1977	8	10	7	28	4.21	33.4167	132.367	40	4.1
1977	8	10	7	28	42	33.42	132.37	40	4.1
1977	8	26	7	51	5	33.187	131.42	128	5
1977	9	5	23	33	16	33.521	131.88	76	4.4
1977	9	9	11	35	4	42.949	131.53	551	5.3
1977	9	18	12	22	8	34.17	131.48	20	4.2
1977	9	18	22	35	2	32.93	130.7	0	4.1
1977	10	2	9	21	25	33.5	132.18	0	3.8
1977	10	3	7	45	22	33.5	132.22	20	3.8
1977	10	9	7	40	10	31.13	131.87	70	4.3
1977	10	9	20	41	58	33.35	131.95	70	4.1
1977	10	15	23	31	58	33.55	132.38	50	4.1
1977	11	11	17	44	33	35.02	131.28	10	3.6
1977	11	13	15	1	10	33.48	132.17	50	3.7
1977	11	19	5	51	51	33.32	132.1	60	3.9
1977	12	1	20	34	33	32.97	130.38	20	4.1
1977	12	6	2	20	3.41	32.8833	130.683	10	3.9
1977	12	6	2	20	34	32.88	130.68	10	3.9
1977	12	21	13	37	53	33	132	50	3.9
1978	1	2	11	17	55	33.17	130.6	10	3.6
1978	1	7	10	3	15	32.88	130.73	10	3.9
1978	1	17	5	52	13	31.219	131.74	32	5.4
1978	1	18	9	36	4.64	32.9667	130.883	0	3.8
1978	1	18	9	36	46	32.97	130.88	0	3.8
1978	1	19	11	54	4	32.72	130.2	10	3.7
1978	1	26	12	14	25	35.32	132.13	10	3.6
1978	2	3	16	32	4.64	32.9167	132.267	40	4.5
1978	2	3	16	32	47	32.883	132.26	32	4.5
1978	2	7	7	49	14	31.83	131.93	10	3.9
1978	2	15	5	1	58	32.62	131.93	60	3.8
1978	2	20	14	27	3	32.88	130.77	10	3.8
1978	2	22	11	15	2	33.48	131.83	70	4
1978	4	5	1	51	3	31.93	131.68	40	3.9
1978	4	15	9	35	4.03	31.75	131.817	50	4.5
1978	4	15	9	35	41	31.749	131.9	30	4.5
1978	4	22	14	43	27	32.55	131.97	30	3.9
1978	4	24	6	26	41	32.609	131.14	155	4.5
1978	4	26	1	20	36	32.92	130.7	0	3.9
1978	4	27	21	58	31	32.9	130.68	10	3.8
1978	4	30	3	55	22	31.377	130.61	147	4.5
1978	5	10	19	36	5.39	31.8333	131.233	70	3.9
1978	5	10	19	36	54	31.83	131.23	70	3.9
1978	5	18	21	33	34	40.687	122.52	18	5.6
1978	5	20	4	48	9	33.401	132.25	61	4.1
1978	5	20	18	37	1.94	33.3667	131.933	70	2.9
1978	5	23	16	50	30	31.09	130.21	160	6.5
1978	6	2	15	3	44	31.35	132.07	30	4.1
1978	6	3	19	56	48	33.38	132.15	40	3.6
1978	6	12	14	38	4.6	32.0333	131.117	100	4.2
1978	6	12	14	38	46	31.964	131.16	99	4.2
1978	6	19	19	49	17	31.885	132.37	21	4.8
1978	7	4	11	40	55	32.729	131.19	122	5.9
1978	7	9	23	38	2	34.5	131.55	20	3.9
1978	7	16	10	13	0.1	33.7167	131.7	110	3.7
1978	7	17	11	16	41	33.83	131.45	20	3.9
1978	7	30	16	20	7	31.535	130.59	160	4.2
1978	8	6	18	26	30	32.9	132.02	10	3.8
1978	8	8	3	26	45	33.93	132.02	30	3.6
1978	8	9	2	22	2.37	33.4	131.8	80	3
1978	8	25	12	20	11	33.48	132.27	10	3.6
1978	8	28	0	36	32	34.45	131.67	30	3.7
1978	8	29	3	22	10	32.08	130.9	0	4.4
1978	8	30	2	29	43	39.1	124.2	0	4.6
1978	8	30	5	53	20	32.07	130.88	0	3.9
1978	9	4	1	55	8	33.02	132.27	20	4
1978	9	13	5	32	4.68	31.9	130.8	10	4.3
1978	9	13	5	32	47	31.9	130.8	10	4.3
1978	9	16	2	7	6	36.6	127.9	0	5.2
1978	9	19	7	55	57	32.92	130.65	0	4
1978	10	7	18	19	52	36.6	126.7	0	5
1978	10	9	12	34	26	35.05	131.85	10	3.4
1978	10	13	23	13	27	33.82	132.12	60	3.7
1978	10	18	22	20	3.1	35.05	132.467	10	3.6
1978	10	19	14	31	25	32.23	131.97	40	4.1
1978	10	26	6	39	4	32.05	131.6	60	3.9
1978	11	1	15	55	53	33.4	132.12	40	3.7
1978	11	22	6	41	2	33.87	132.2	50	3.8
1978	11	23	11	6	5	38.4	125.6	0	4.7
1978	11	25	2	20	32	32.98	130.5	20	3.6
1978	12	4	0	1	28	32.518	132.11	27	4.1
1978	12	4	8	38	3.76	31.9167	132.317	40	4.3
1978	12	4	9	1	13	31.892	132.39	37	4.9
1978	12	4	9	40	53	31.892	132.29	26	5.5
1978	12	4	15	16	16	37.4	128.7	0	2.7
1978	12	7	15	8	5.79	31.9667	130.583	0	4.5
1978	12	7	15	8	58	31.986	130.54	15	4.5
1978	12	8	14	28	2	33.67	132.38	40	3.8
1978	12	9	6	56	3.87	33.1333	130.533	10	3.8
1978	12	9	6	56	39	33.13	130.53	10	3.8
1978	12	12	21	58	38	35.9	126.3	0	3.4
1978	12	18	20	58	24	32.67	132.22	40	4.1
1978	12	25	15	22	3	32.98	132.03	50	3.9
1978	12	25	21	56	29	32.7	130.3	0	3.7
1978	12	25	22	31	3	32.77	130.25	0	3.9
1979	1	1	0	11	22	36.6	126.7	0	2.8
1979	1	19	16	43	11	33.05	130.47	10	3.8
1979	1	24	0	40	57	35.7	126	0	2.9
1979	1	29	10	6	2	38.3	126	0	3.4
1979	1	30	0	33	12	36.1	128.3	0	2.9
1979	1	31	21	36	26	42.763	131.24	557	5.8
1979	2	3	22	2	50	33.82	132	60	3.8
1979	2	4	9	29	18	38.4	125.7	0	3.9
1979	2	5	3	7	4.77	34.1833	131.383	10	4.1
1979	2	8	3	50	49	32.13	131.97	30	4
1979	2	8	8	52	20	36.6	126.7	0	4.1
1979	2	9	7	11	0.89	31.0667	132.267	30	4.2
1979	2	21	4	47	48	34.73	131.32	0	4
1979	2	24	14	44	7	38.3	125.1	0	2.6
1979	2	24	19	0	30	36.6	126.7	0	2.8
1979	2	24	20	24	14	31.68	131.67	40	4.2
1979	2	25	16	45	0.26	33.3167	131.7	80	2.9
1979	2	27	0	56	15	33.17	132.08	50	3.8
1979	3	4	22	50	3.11	32.1333	131.283	90	3.6
1979	3	5	6	54	3.98	31.1	132.15	10	4.4
1979	3	12	11	9	24	36.6	126.7	0	4
1979	3	17	12	26	6	31.969	130.62	11	5
1979	3	17	22	23	14	34.58	131.78	20	4.3
1979	3	20	17	5	17	33.1	132.13	50	3.8
1979	3	20	19	25	18	32.55	130.17	10	3.8
1979	3	25	14	43	11	33.18	130.55	10	3.8
1979	3	25	14	54	4.01	33.2	130.533	10	3.8
1979	3	25	14	54	40	33.2	130.53	10	3.8
1979	3	25	15	11	29	33.2	130.53	0	3.8
1979	3	25	22	52	1	32	132.18	0	4.3
1979	4	3	12	0	30	31.18	129.53	30	4.4
1979	4	4	9	30	5.47	32.6667	132.117	20	4
1979	4	4	9	30	55	32.67	132.12	20	4
1979	4	7	3	1	10	33.2	132.4	30	3.8
1979	4	9	8	49	33	39.7	125.7	0	3.4
1979	4	24	5	44	27	36.8	128.5	0	2.9
1979	5	30	10	32	5.53	34.7833	132.217	10	4.3
1979	6	5	3	49	10	33.3	132.35	33	4.3
1979	6	6	23	48	5.41	32.0333	131.967	30	4.4
1979	6	10	10	30	28	31.88	129.25	0	4.3
1979	6	20	15	10	0.8	32.9167	131.8	70	3
1979	7	6	12	27	3.69	31.25	129.533	10	4.4
1979	7	6	21	40	4.71	32.9667	130.283	40	3.8
1979	7	6	21	40	47	32.97	130.28	40	3.8
1979	7	13	17	10	13	33.856	131.94	68	6
1979	7	31	0	40	5.65	33.2833	131.833	70	2.9
1979	8	5	14	13	19	33.02	130.83	0	3
1979	8	7	9	51	5.86	32.05	131.033	110	2.9
1979	8	13	12	12	2	36.3	128.5	0	3.7
1979	8	14	10	5	5	39.5	125.8	0	2.9
1979	8	17	6	31	28	41.841	130.99	588	6.1
1979	8	18	16	34	4	37	126.4	0	2.8
1979	8	20	3	40	43	33.05	131.95	10	3
1979	8	20	5	23	30	32.27	132.08	50	3.6
1979	8	24	8	30	17	36.6	124	0	4
1979	8	25	18	17	4.42	33.4833	132.083	70	3.7
1979	8	26	10	4	27	34.1	131.88	0	3.8
1979	8	26	14	27	0.8	33.6167	132.133	70	3.7
1979	8	28	3	5	5.82	32.4	132.183	20	3
1979	8	28	3	5	58	32.4	132.18	20	3
1979	8	30	0	39	54	38.3	127.9	0	2.9
1979	9	1	4	36	15	31.75	131.97	20	3.6
1979	9	7	22	40	4.97	32.75	130.4	0	3.7
1979	9	7	23	28	41	33.53	132.28	40	3.8
1979	9	13	0	8	5.25	32.8833	130.75	10	3.8
1979	9	13	0	8	52	32.88	130.75	10	3.8
1979	9	16	3	22	53	31.13	131.3	50	3.8
1979	9	17	15	44	52	33.03	130.55	0	3.8
1979	9	27	23	8	31	32.669	131.24	119	4.1
1979	9	30	23	14	19	42.97	131.37	538	4.8
1979	10	4	23	18	18	33.474	132.1	46	4.5
1979	10	6	3	44	3.81	31.5	131.95	20	4.2
1979	10	6	3	44	38	31.5	131.95	20	4.2
1979	10	10	6	59	48	38.9	125.7	0	3
1979	10	11	1	30	4.39	32	132.1	40	4.3
1979	10	14	12	31	57	31.9	131.37	60	3.6
1979	10	21	9	7	19	35.28	130.78	0	3.6
1979	10	25	5	42	14	32.962	132.3	28	4.5
1979	10	26	10	34	45	32.38	131.53	50	2.7
1979	10	27	12	59	41	39.5	125.7	0	3.9
1979	10	30	17	31	3.84	33.0333	130.317	10	3.8
1979	11	8	16	35	33	32.97	131.05	30	3.6
1979	11	19	4	13	37	35.9	126.1	0	3.4
1979	11	21	7	40	54	34.57	132.18	10	2.9
1979	11	22	1	28	0.2	32.7167	131.25	130	3.9
1979	11	24	15	4	16	33.65	132.23	60	3.6
1979	11	29	5	53	1	34	131.12	10	3.6
1979	11	29	15	19	22	33.22	131.08	0	4.3
1979	11	29	22	0	12	31.378	131.87	8	4.4
1979	11	30	21	23	24	32	130.58	10	3
1979	12	4	7	46	40	33.18	131.1	30	2.9
1979	12	9	7	28	32	32.52	129.92	50	3.4
1979	12	9	15	50	39	33.3	131.53	30	2.8
1979	12	10	1	50	56	33.23	130.73	50	2.9
1979	12	11	8	6	4.77	33.0833	130.45	20	3.8
1979	12	11	8	6	48	33.08	130.45	20	3.8
1979	12	11	17	4	14	32.55	132.22	30	4.5
1979	12	11	17	25	5.04	32	130.583	20	3.9
1979	12	11	17	25	50	32	130.58	20	3.9
1979	12	13	2	7	30	33.63	130.65	20	2.8
1979	12	13	12	23	19	32.57	130.92	10	3.6
1979	12	15	10	22	1.92	33.3833	131.95	70	3
1979	12	18	20	11	48	31.5	131.5	50	3.6
1979	12	19	7	32	54	35.4	127.5	0	3.7
1979	12	20	15	7	56	36.2	127.3	0	2.9
1979	12	25	16	55	5	38.8	126.3	0	3.4
1979	12	28	6	32	6	32	131.8	40	3
1979	12	29	8	57	49	33.896	132.21	61	3.9
1980	1	5	6	29	1	31	132.03	60	4.2
1980	1	5	16	9	3.89	31.7	130.783	110	3
1980	1	5	21	45	18	31.57	131.85	20	3.8
1980	1	8	8	44	13	40.2	125	0	5.3
1980	1	8	12	1	59	32	131.9	40	3.6
1980	1	11	11	50	3	33.28	130.57	30	3
1980	1	12	13	1	15	32.57	132.3	30	3.8
1980	1	15	3	8	34	32.8	130.88	0	3
1980	1	17	17	34	3.95	33.6667	132.367	0	3.4
1980	1	23	8	59	31	32.72	130.7	20	2.7
1980	1	29	3	57	11	33.48	131.83	60	3
1980	1	29	18	11	1	34.55	131.48	10	3.6
1980	2	1	23	58	51	33.2	131.55	100	4
1980	2	2	17	49	52	33.22	130.92	50	3.4
1980	2	6	6	50	44	31.72	131.97	20	4
1980	2	8	18	1	44	32.58	132.33	30	3
1980	2	10	0	26	34	31.98	130.65	10	3.6
1980	2	16	18	15	31	33.22	130.83	50	3
1980	2	17	11	52	3.65	32.2667	132.033	30	4.3
1980	2	18	2	45	1.3	31.1167	131.5	40	4.6
1980	2	18	4	36	3.25	33.2167	132.15	60	2.6
1980	2	21	7	1	5.72	31.6	132.083	40	4.2
1980	2	22	7	31	3.02	33.4167	131.683	100	3
1980	2	22	8	53	3	31.381	132.31	27	5.3
1980	2	22	11	54	9	31.384	132.38	29	5.3
1980	2	23	16	32	49	32.07	130.17	20	3
1980	2	26	17	18	15	32.02	131.67	50	3
1980	2	29	23	18	9	31.117	131.44	32	5.1
1980	3	2	13	44	34	31.12	131.95	40	3.7
1980	3	10	17	57	37	34.8	132.12	10	2.7
1980	3	11	23	5	51	32.03	131.85	0	3
1980	3	13	21	21	5.55	33.55	130.3	20	2.9
1980	3	14	16	57	56	33.47	132.18	40	3.9
1980	3	15	3	23	10	32.22	132.38	40	3.6
1980	3	26	16	37	3.6	34.05	130.833	10	3.8
1980	3	26	16	37	36	34.05	130.83	10	3.8
1980	3	29	8	44	45	33.03	131.97	0	3.6
1980	4	1	18	7	3.53	32.75	130.517	10	4.5
1980	4	3	21	24	3.36	33	131.467	90	2.6
1980	4	5	19	10	5.19	31.95	130.05	20	4.4
1980	4	6	2	51	31	31.88	131.95	20	3.6
1980	4	6	4	53	50	33.67	132.28	60	3.4
1980	4	6	19	22	35	32.03	131.98	50	3.8
1980	4	8	17	31	26	32.52	132.28	30	3.4
1980	4	13	20	38	15	31.83	131.93	30	3.9
1980	4	18	17	30	15	32.495	131.11	153	5.1
1980	4	23	11	19	7	32.25	132.18	30	3.6
1980	4	23	14	21	53	33.68	132.4	50	3.7
1980	4	26	1	44	4.5	32.2833	130.383	10	4.1
1980	4	26	1	44	45	32.28	130.38	10	4.1
1980	4	26	16	18	0.7	31.85	131.1	70	3
1980	4	26	23	12	47	34.67	131.95	20	3.6
1980	5	7	20	35	59	32.77	130.53	10	3
1980	5	9	20	8	36	32.42	132.15	30	3.8
1980	5	10	4	31	52	33.45	132.08	30	3.4
1980	5	15	14	43	29	38.3	125.7	0	3
1980	5	17	5	5	29	33.35	132.02	70	3.8
1980	5	29	14	27	59	32.15	131.88	0	2.9
1980	5	30	0	24	23	32.75	130.12	10	3
1980	5	30	1	31	0	32.75	130.1	10	3
1980	6	1	5	2	6	33.03	130.25	10	3.6
1980	6	11	3	11	51	32.78	130.53	10	3
1980	6	14	20	38	3	33.72	131.37	10	3.8
1980	6	16	14	25	51	33.1	131.98	0	3.6
1980	6	16	18	0	41	33.1	130.43	10	3.6
1980	6	18	9	23	18	32.63	130.08	10	4.1
1980	6	19	6	48	10	31.78	131.92	30	3
1980	6	20	22	40	6	32.48	131.95	40	3.7
1980	6	22	14	36	47	31.95	131.6	40	3.4
1980	6	27	6	13	18	33.45	132.22	40	3.7
1980	6	28	11	7	0.4	33.25	131.85	70	2.9
1980	6	30	12	18	41	33.55	132.3	50	3.7
1980	6	30	13	29	59	39.4	125.7	0	2.7
1980	6	30	15	19	30	32.448	129.8	9	4.3
1980	6	30	23	0	48	34	126	0	3.8
1980	7	7	21	37	2.06	32.0333	131.183	70	2.9
1980	7	9	0	17	18	33.77	132.22	50	2.9
1980	7	12	21	22	3.62	31.8	131.967	0	3
1980	7	12	22	34	16	31.77	132.03	20	3
1980	7	13	8	20	41	32.77	130.57	10	3
1980	7	20	17	27	34	32.08	131.95	60	3.6
1980	7	25	10	37	9	32.92	131	0	3.4
1980	7	25	19	22	18	32.67	130.13	10	3
1980	7	26	5	59	29	38.8	125.7	0	3.7
1980	7	27	8	40	49	33.2	132.35	30	3
1980	7	28	13	2	16	31.361	130.52	163	4.8
1980	8	2	19	14	36	32.93	131.02	0	2.8
1980	8	4	20	26	30	32.92	130.3	20	3.9
1980	8	5	8	47	14	32.48	131.97	40	3.8
1980	8	6	4	50	10	33.47	132.27	60	3
1980	8	7	9	50	58	31.93	131.73	40	3
1980	8	7	14	44	12	32.68	130.22	0	3.8
1980	8	10	1	26	30	33.77	132.3	50	4
1980	8	13	4	49	19	32.65	132.02	30	3
1980	8	19	7	9	8	33.18	131.93	20	3
1980	8	19	21	40	10	31.58	131.85	40	3.8
1980	8	23	11	24	1	37.1	125.3	0	2.9
1980	8	25	17	4	45	31.88	131.93	20	2.9
1980	8	28	17	49	27	32.78	130.53	0	3.8
1980	8	29	3	18	0.85	33.6667	131.95	70	2.9
1980	9	5	5	53	20	31.97	129.85	10	3.8
1980	9	7	5	19	27	32.83	129.98	10	3
1980	9	8	9	29	19	32.13	129.35	0	3.9
1980	9	10	1	8	5	31.87	131.93	20	3.7
1980	9	13	12	45	14	32.88	131.67	60	3
1980	9	15	2	32	25	32.72	130.18	10	3.8
1980	9	17	23	13	32	33.075	130.59	13	3.9
1980	9	19	6	13	4.82	33.5	131.9	70	4.1
1980	9	19	6	13	48	33.5	131.9	70	4.1
1980	9	19	9	29	11	32.58	129.88	0	3
1980	9	20	20	7	8	38.219	130.7	18	5.5
1980	9	25	13	0	35	39.5	126	0	2.6
1980	9	26	15	6	49	32	129.93	20	3
1980	9	29	1	44	13	33.13	130.53	10	3.6
1980	9	29	4	37	7	32	129.83	20	3.6
1980	10	2	17	21	3	33.03	130.55	10	2.9
1980	10	3	3	22	51	33.27	132.13	50	3.6
1980	10	6	0	18	57	33.78	132.3	50	3.6
1980	10	9	23	50	49	32.88	130.58	0	2.7
1980	10	19	17	51	50	31.33	131.62	40	3.7
1980	10	21	2	24	19	33.055	131.52	102	4
1980	10	21	5	55	4.9	31.7333	132	20	4.7
1980	10	22	1	7	52	34.6	132.43	10	3.6
1980	10	24	22	55	18	31.57	131.22	0	3
1980	10	28	0	37	10	34.87	132.23	10	2.8
1980	10	28	2	35	11	32.63	130.03	10	3.9
1980	10	28	13	12	8	33.5	132.28	40	3.7
1980	10	29	3	42	25	32.93	132.33	20	3.6
1980	11	3	14	10	31	31.02	131.65	40	4
1980	11	4	15	2	3	33.65	132.3	40	3.6
1980	11	6	15	33	42	32.63	132.32	30	3.8
1980	11	6	23	29	34	33.43	132.27	50	3.4
1980	11	7	12	31	3.91	32.9167	130.333	10	3.9
1980	11	7	12	31	39	32.92	130.33	10	3.9
1980	11	8	16	31	39	33.47	132.13	30	3.6
1980	11	17	4	38	5	32.25	129.53	10	3.9
1980	11	17	19	26	30	32.97	130.75	30	2.8
1980	11	19	11	11	48	34.4	131.43	10	3.6
1980	11	19	20	40	54	33.33	132.3	60	3
1980	11	28	12	59	2	39.4	125.8	0	2.6
1980	11	28	14	27	34	38.8	125.6	0	2.6
1980	12	1	13	29	58	40.7	127.2	0	3.7
1980	12	1	18	10	59	32.13	131.9	50	3.8
1980	12	1	20	46	13	40.7	127.2	0	2.9
1980	12	2	12	48	52	33.33	131.82	60	2.9
1980	12	3	8	53	24	31.93	130.83	30	3.7
1980	12	4	2	39	26	33.5	132.02	50	3.6
1980	12	6	0	8	19	38.4	126.1	0	2.7
1980	12	12	7	23	3.41	32.6667	129.933	10	3.8
1980	12	12	7	23	34	32.67	129.93	10	3.8
1980	12	12	8	10	3	32.391	131.75	47	5.9
1980	12	14	5	44	44	32.9	130.65	20	2.9
1980	12	15	15	40	7	34.22	132.07	10	2.9
1980	12	21	22	54	25	34.869	132.43	5	4.6
1980	12	23	7	4	25	38.2	129.4	0	2.9
1980	12	24	21	38	33	36	128.6	0	2.6
1980	12	27	1	23	54	34.45	131.68	10	3.4
1980	12	29	13	0	6	39.8	126.4	0	2.7
1980	12	30	18	18	0	35.98	131.62	0	3.9
1981	1	2	19	8	48	39.7	124.8	0	3.7
1981	1	5	8	44	5.36	33.4333	132.233	60	4.2
1981	1	5	8	44	54	33.407	132.26	61	4.2
1981	1	10	4	41	5	34.05	131.05	20	4
1981	1	11	3	13	1.71	31.15	131.567	0	4.8
1981	1	12	22	46	5.2	31.5667	131.517	40	4
1981	1	12	22	46	52	31.57	131.52	40	4
1981	1	21	3	29	21	33.72	132.3	50	3
1981	1	24	4	39	27	33.57	132.28	40	3.4
1981	1	26	8	12	9	33.2	130.58	10	3
1981	1	30	6	19	36	32.449	129.79	17	5.3
1981	2	3	15	30	37	31.206	130.53	164	4.9
1981	2	4	13	25	58	31.52	131.93	60	3.6
1981	2	5	17	54	13	34.57	132.27	10	2.8
1981	2	6	19	7	9	34.43	132.18	0	2.8
1981	2	13	12	49	10	33.23	132.17	60	4.3
1981	2	15	5	10	29	32.82	130.18	0	3.6
1981	2	19	14	41	4.58	33.6333	131.8	90	3
1981	3	1	10	29	30	32.53	130.73	10	3.7
1981	3	8	1	34	49	31.8	131.12	50	3.6
1981	3	8	10	22	49	33.8	132.45	50	3
1981	3	10	15	24	39	38.9	125.7	0	2.9
1981	3	17	23	59	36	33.68	132.3	50	3.6
1981	3	25	4	36	4.1	31.3	131.7	40	4.1
1981	3	25	4	36	41	31.3	131.7	40	4.1
1981	3	28	10	53	46	33.47	130.55	20	3.6
1981	4	2	1	18	6	31.93	131.23	0	3
1981	4	3	18	39	44	36	128.9	0	2.6
1981	4	6	6	3	5.77	33.0667	131.1	30	4.1
1981	4	6	18	42	38	38.9	125.4	0	3.9
1981	4	8	11	7	2.9	33.2833	131.567	110	3
1981	4	11	15	0	9	32.82	130.7	10	4
1981	4	12	20	36	28	32.92	131.93	40	3.4
1981	4	15	11	47	0	35.9	130.1	0	4.8
1981	4	15	11	47	8	34.966	130.55	35	5.8
1981	4	16	11	48	19	31.68	131.95	20	4.3
1981	4	21	19	1	0.29	32.9667	131.817	70	2.8
1981	4	22	0	31	5.07	32.5667	130.75	0	3.6
1981	4	22	0	31	51	32.57	130.75	0	3.6
1981	4	24	14	45	4.05	32.5	129.617	30	4
1981	4	26	8	17	37	33.43	132.3	50	3
1981	5	15	5	52	0.77	31.8667	130.883	90	2.8
1981	5	19	13	59	36	39.4	125.6	0	2.7
1981	5	21	18	9	32	38.7	126.1	0	2.9
1981	5	24	19	20	40	34.02	132.12	20	3.4
1981	5	28	18	43	2.05	32.4333	130.983	140	3.6
1981	6	10	12	59	16	39.5	125.8	0	2.9
1981	6	12	23	14	0.37	33.3167	131.567	100	2.9
1981	6	14	17	42	10	33.07	130.53	20	3.6
1981	6	14	20	57	59	37.8	125.7	0	2.7
1981	6	17	23	9	5	33.5	130.35	10	4.1
1981	6	24	4	37	0	32.98	130.37	20	3.4
1981	6	25	12	51	29	35.334	131.93	6	4.4
1981	6	26	16	56	41	33.38	132.18	50	3
1981	6	27	7	58	47	34.5	131.73	20	3.4
1981	7	11	12	10	30	32.77	130.27	0	2.9
1981	7	11	23	2	3.61	33.0667	131.217	10	3.9
1981	7	13	3	37	5.87	31.95	132.217	10	4.6
1981	7	13	6	17	3.35	31.9667	132.2	30	4.4
1981	7	13	20	37	48	32.65	130.02	0	3.6
1981	7	15	15	25	34	32.87	130.58	10	2.8
1981	7	17	0	46	39	33.39	132.22	65	5.2
1981	7	19	14	26	5.6	31.9667	130.633	10	3
1981	7	20	9	37	46	32.98	131.05	0	3.4
1981	7	21	1	51	29	33	131.03	10	3.6
1981	7	21	12	35	16	34.53	132.43	0	2.8
1981	7	23	18	22	6	32.03	132.23	50	3
1981	8	1	23	34	28	31.13	131.85	40	3.9
1981	8	4	18	39	4.74	31.7167	131.933	20	4.7
1981	8	6	22	50	6	31.182	131.8	27	5.3
1981	8	7	0	34	41	32.74	132.34	30	4.4
1981	8	10	13	53	36	32.45	130.68	10	3.6
1981	8	12	12	43	17	40.909	122.57	35	5
1981	8	14	14	44	50	32.9	130.72	20	3
1981	8	27	21	35	30	35.8	129.8	0	3.7
1981	9	1	6	58	23	32.57	130.73	10	4.3
1981	9	3	17	13	5.34	32.0333	132.45	50	3.9
1981	9	3	19	57	6	33.42	132.05	60	3.6
1981	9	6	12	59	10	39.6	126.6	0	2.6
1981	9	14	0	2	1	32.47	129.35	40	3.4
1981	9	16	9	27	2	33.85	132.42	40	3.4
1981	9	18	9	23	47	34.33	131.23	10	3.4
1981	9	18	18	51	45	32	131.15	60	3
1981	9	23	2	4	4.3	33.4667	131.817	70	2.8
1981	9	23	8	13	37	36.9	126.3	0	3.7
1981	9	25	3	18	33	39.7	125.5	0	3.6
1981	9	27	6	19	44	31.73	131.97	20	3.7
1981	10	5	13	28	14	42.795	131.36	538	5
1981	10	6	3	58	18	33.55	132.33	40	3
1981	10	6	21	1	3.7	33.5	131.75	80	2.9
1981	10	10	0	17	12	37.3	128.7	0	2.6
1981	10	16	20	44	3.42	31.3167	130.3	150	3.4
1981	10	18	10	8	29	40.537	122.78	10	5
1981	10	19	1	18	27	32.5	130.6	0	3.8
1981	10	20	18	47	11	33.42	132.35	50	2.9
1981	10	21	4	49	5	31.77	131.87	20	3
1981	10	21	15	7	26	32.55	130.98	0	3.6
1981	10	27	6	33	15	34.62	131.9	10	4.4
1981	10	29	8	56	5.9	32.4667	129.867	10	4.3
1981	10	31	11	39	4.1	31.1	130.183	150	3.4
1981	11	10	11	19	24	33.3	132.08	40	3.8
1981	11	10	14	22	4.21	32.4333	131.167	140	3.4
1981	11	15	17	55	4.81	33.0167	131.8	70	4.3
1981	11	15	17	55	48	33.02	131.8	70	4.3
1981	11	16	7	26	57	33.02	130.75	10	2.9
1981	11	19	3	20	20	32.78	130.27	0	3.6
1981	11	19	7	51	37	31.885	131.82	39	5.5
1981	11	20	17	3	1	32.83	130.57	10	3
1981	11	26	10	11	23	32.95	131.87	0	3
1981	11	28	2	21	47	42.87	131.29	549	6
1981	12	1	23	47	3	32.57	131.7	50	3.8
1981	12	3	12	25	7	38.9	125.9	0	2.9
1981	12	3	22	27	3	31.48	131.87	30	4.1
1981	12	11	9	34	48	31.21	130.39	148	4.1
1981	12	11	23	48	20	31.418	130.43	151	4.1
1981	12	12	22	13	14	31.7	131.92	40	3.4
1981	12	15	2	12	26	32.45	129.85	0	3.4
1981	12	16	6	8	13	32.7	130.77	10	3.7
1981	12	16	9	28	19	33.15	131.87	10	2.8
1981	12	17	6	10	0	32.97	130.4	20	3.6
1981	12	18	5	58	41	34.65	131.9	10	3
1981	12	19	0	36	30	31.98	131.87	40	3
1981	12	19	19	4	45	32.7	130.73	10	3.8
1981	12	20	1	38	3	31.803	131.55	33	4.1
1981	12	23	4	52	12	33.15	132.07	60	3.9
1981	12	26	20	45	23	33.52	130.1	10	3.4
1981	12	30	16	2	20	33.48	132.32	40	3.6
1982	1	1	12	19	38	32.57	131.9	50	3.6
1982	1	6	21	16	30	32.87	130.83	10	3
1982	1	7	12	41	38	32.52	131.25	90	3.8
1982	1	9	1	5	1.04	33.7	132.017	70	3
1982	1	9	1	7	4.95	31.7167	131.933	40	4.1
1982	1	9	2	55	24	32.87	130.75	10	2.9
1982	1	11	8	9	33	32.82	129.98	0	2.8
1982	1	12	11	23	33	33.004	131.37	121	4.4
1982	1	14	18	43	4.82	32.0833	130.85	20	3.8
1982	1	14	18	43	48	32.08	130.85	20	3.8
1982	1	20	4	42	1	33.5	130.32	10	3.4
1982	1	23	14	7	52	31.63	131.57	40	3
1982	1	25	12	30	50	32.532	131.15	148	4.9
1982	1	28	14	41	4.65	32.1	132.217	20	3.8
1982	1	28	14	41	46	32.1	132.22	20	3.8
1982	1	28	17	22	15	32.68	131.72	60	3.6
1982	1	29	12	24	3.1	33.4333	131.55	110	2.9
1982	1	31	17	25	5.31	32.9167	130.883	0	3
1982	2	2	20	3	3.98	31.9	131.8	40	4.3
1982	2	3	16	13	21	35.25	131.47	30	4
1982	2	12	6	48	43	34.5	128.2	0	2.6
1982	2	14	4	24	2	32.05	129.2	0	3.8
1982	2	14	23	37	32	38.3	125.7	0	4.6
1982	2	23	7	0	1.4	31.2833	130.65	150	3.8
1982	2	24	21	40	8	31.694	128.67	10	4.3
1982	2	24	23	27	20	36.1	127.5	0	2.6
1982	2	25	19	14	28	38.8	125.7	0	3.6
1982	2	28	8	45	5	32.12	131.98	50	2.9
1982	3	1	0	28	2	37.2	129.8	0	4.7
1982	3	3	0	42	3.6	33.4833	132.317	40	4.2
1982	3	5	10	9	4.94	32.4333	130.483	10	4.5
1982	3	5	10	9	49	32.46	130.53	10	4.5
1982	3	5	10	17	1	32.68	130	0	3
1982	3	5	10	38	58	32.67	130	0	3
1982	3	6	19	16	35	31.922	131.83	39	5.5
1982	3	10	14	13	2.24	33.6333	131.967	70	3.8
1982	3	17	2	48	59	31.95	131.13	60	2.9
1982	3	17	18	52	18	33	130.47	10	4.2
1982	3	20	1	30	31	33.72	130.43	10	3.9
1982	3	20	5	15	4	32.4	130.5	10	3
1982	3	25	6	3	45	33.62	132.18	60	3.8
1982	3	25	21	52	14	33.9	132.07	0	3
1982	3	28	1	4	32	37.6	125.3	0	3.8
1982	3	30	6	13	5	36.4	127.6	0	2.9
1982	3	31	17	21	59	33.22	131.9	10	3
1982	4	5	13	33	30	33.753	132.26	45	4.9
1982	4	6	2	28	29	34.8	131.98	20	2.9
1982	4	8	18	53	2	33.122	132.04	49	4.3
1982	4	13	19	9	18	33.65	132.2	40	3
1982	4	14	11	35	32	33	130.23	20	3.6
1982	4	14	11	52	20	31.274	131.97	29	4.1
1982	4	17	1	5	0	32.85	130.55	10	2.8
1982	4	20	1	18	43	31.33	132.08	30	3.7
1982	4	21	22	57	30	32.87	130.62	10	3
1982	4	24	4	56	44	34.02	132.42	50	3.8
1982	4	24	14	41	20	31.2	131.5	50	3.6
1982	4	27	10	9	3.35	32.2	131.017	110	3
1982	4	28	13	33	28	32.67	130.77	0	3
1982	5	6	8	10	51	31.42	129.37	11	5.4
1982	5	8	11	18	5.85	33.75	132.417	0	3
1982	5	8	11	18	58	33.75	132.42	0	3
1982	5	9	6	16	1.82	31.4833	130.55	130	3.9
1982	5	15	19	15	9	31.173	131.66	42	4.9
1982	5	21	9	22	38	33.68	132.33	10	3
1982	5	27	19	21	4	38.6	125.8	0	3.7
1982	5	31	7	11	14	32.52	132.18	30	3.4
1982	5	31	21	38	1	33.83	132.37	50	3.8
1982	6	2	4	3	45	32.83	130.58	20	3.4
1982	6	6	18	11	47	31.97	132.35	50	3.7
1982	6	7	10	25	5.92	32.75	130.133	10	4.1
1982	6	12	12	14	0.08	31.6667	130.75	120	3.7
1982	6	13	9	36	20	33.47	130.48	0	3.4
1982	6	15	12	14	45	39.004	129.96	600	4.3
1982	6	22	1	50	59	32.18	129.57	0	3
1982	6	22	5	47	24	32.32	129.88	0	2.9
1982	7	5	17	56	57	31.053	130.54	118	5.8
1982	7	8	21	48	21	34.48	131.73	20	3.7
1982	7	16	22	47	35	33.08	130.5	20	3.7
1982	7	21	12	19	12	31.931	131.92	40	4.8
1982	7	21	18	12	40	34.6	132.3	20	2.8
1982	7	22	8	58	11	32.33	132.15	0	4
1982	8	4	2	26	11	32.08	130.2	0	4.1
1982	8	8	3	47	14	32.32	132.05	40	3.9
1982	8	8	4	1	5	32.13	131.5	20	3.7
1982	8	12	17	11	4	32.22	129.38	10	4
1982	8	19	7	4	53	33.67	132.32	40	4.2
1982	8	25	4	18	11	34	131.58	10	4
1982	8	29	3	18	40	37.2	125.9	0	4.1
1982	8	29	19	34	1.3	33.35	131.533	130	3.4
1982	9	1	22	44	3	31.954	131.94	27	4.9
1982	9	10	22	52	58	33.13	132	10	4.2
1982	9	25	0	42	40	33.42	132.15	60	3.6
1982	9	25	17	26	4	34.1833	132.467	20	2.8
1982	9	29	13	28	10	33.68	132.27	50	3.6
1982	9	30	21	29	3.5	31.9	131.25	10	3.9
1982	9	30	21	29	34	31.953	131.19	3	3.9
1982	10	4	18	3	0	31.004	128.64	35	4.6
1982	10	10	14	48	25	32.98	130.12	20	3
1982	10	11	17	32	25	36.4	129.6	0	3
1982	10	11	19	48	4	33.33	132.45	50	3.4
1982	10	17	2	19	3.55	32.3167	129.483	10	3.9
1982	10	17	2	19	35	32.32	129.48	10	3.9
1982	10	19	1	19	3	32.73	130.13	10	3.8
1982	10	21	15	58	6	32.53	130.63	10	3.9
1982	10	25	17	56	52	33.57	131.56	120	5.1
1982	10	30	20	24	44	32.85	130.78	10	2.9
1982	11	7	3	19	57	32.92	130.15	20	3
1982	11	9	2	38	4	34.98	130.98	10	3.8
1982	11	17	13	28	29	31.73	131.22	60	3.8
1982	12	1	17	39	44	31.838	131.85	26	5.3
1982	12	2	12	26	42	32.62	130.68	10	3.8
1982	12	2	19	25	34	32.02	131.27	60	3.7
1982	12	6	13	9	27	33.3	132.12	40	3.8
1982	12	7	5	21	22	31.15	131.52	40	3.8
1982	12	13	11	38	5	31.8833	130.817	150	3.9
1982	12	15	6	38	4.67	32.7667	129.95	10	2.8
1982	12	15	6	38	47	32.77	129.95	10	2.8
1982	12	18	17	56	40	33.5	132.2	60	3.7
1982	12	30	10	39	58	33.5	132.08	50	3.9
1983	1	3	21	16	30	32.61	130.93	7	3.4
1983	1	8	1	11	21	32.71	130.04	0	4
1983	1	8	10	36	5.46	33.82	131.842	83	4.2
1983	1	8	10	36	55	33.82	131.84	83	4.2
1983	1	11	1	50	54	38.9	125.6	0	4.6
1983	1	13	14	44	41	31.946	131.19	61	5.1
1983	1	16	6	18	5.41	33.11	131.412	123	3.7
1983	1	17	12	19	50	33.457	132.43	33	4.3
1983	1	19	14	17	21	33.21	132.36	47	4.3
1983	1	27	22	3	12	34.77	132.1	21	3.7
1983	1	28	10	47	4.04	34.5917	131.327	12	4.7
1983	1	28	10	47	40	34.59	131.33	12	4.7
1983	2	8	20	57	13	38	124.9	0	2.8
1983	2	11	4	53	20	38.6	126.5	0	2.6
1983	2	12	3	11	49	33.38	132.28	36	3.9
1983	2	17	4	25	52	33.32	131.79	2	3.4
1983	2	19	18	25	42	32.62	130.03	34	3.8
1983	2	26	12	1	26	31.92	131.84	41	5.5
1983	2	28	16	36	52	37.7	126.1	0	2.6
1983	3	1	16	46	53	32.49	131.12	9	3.6
1983	3	9	7	3	14	33.91	132.35	44	3.4
1983	3	12	4	51	0.46	32.845	130.922	14	2.6
1983	3	14	14	49	50	31.15	131.43	40	3.8
1983	3	15	8	59	4.81	32.78	130.725	12	4.2
1983	3	15	9	53	47	31.1	131.54	38	4.1
1983	3	17	0	6	21	32.47	130.6	7	3.8
1983	3	18	15	39	16	33.77	132.27	43	4.3
1983	3	20	10	56	27	40.236	122.25	10	4.8
1983	3	25	9	48	3.9	31.9283	130.883	140	4.3
1983	3	25	17	22	51	32.87	130.61	13	3.8
1983	3	28	13	43	33	32.72	131.98	42	3.6
1983	3	29	13	53	1.16	31.06	131.493	37	4.8
1983	3	29	18	49	40	32.48	131.87	41	4
1983	4	1	6	4	34	32.72	130.12	3	3.6
1983	4	3	21	5	33	31.46	131.6	34	3.9
1983	4	5	2	56	5.55	33.275	131.075	11	3
1983	4	6	18	9	21	32.67	130.03	9	3.7
1983	4	8	13	36	5.52	31.9933	131.07	77	2.9
1983	4	23	17	20	29	33.68	132.37	40	3
1983	4	26	19	52	2.33	32.7817	130.615	14	3
1983	4	27	15	25	3.56	32.835	132.16	42	4.5
1983	5	3	14	26	0.23	33.0867	131.432	113	3.7
1983	5	6	3	53	37	33.5	132.19	12	3.6
1983	5	8	18	18	5.86	33.4083	131.615	113	3.4
1983	5	9	18	59	40	38.9	126.3	0	3.4
1983	5	10	5	45	28	40.634	122.76	10	4.9
1983	5	14	13	42	17	32.68	130.1	5	3
1983	5	31	12	24	3.51	32.8967	130.657	9	3
1983	6	2	8	15	1.71	31.85	131.13	95	3.9
1983	6	2	15	22	2	33.21	132.15	36	3.8
1983	6	7	1	34	3.42	33.4083	131.767	77	3
1983	6	8	21	25	22	36.8	127.8	0	3.6
1983	6	11	1	27	36	33.01	132.06	0	3.8
1983	6	12	10	4	50	32.97	131.03	6	3.7
1983	6	12	11	39	1	32.98	131.02	7	3.8
1983	6	14	4	52	29	32.75	130.22	15	3.6
1983	6	19	6	29	35	33.522	131.94	75	5.4
1983	6	21	0	52	18	36.8	127.5	0	2.9
1983	6	28	11	8	5.45	32.975	131.647	73	4.3
1983	6	28	11	8	55	32.97	131.65	73	4.3
1983	7	3	4	30	32	32.69	130.16	3	3.6
1983	7	5	5	28	47	31.035	131.2	50	4.7
1983	7	23	11	30	3.48	32.1733	130.782	0	3.6
1983	7	27	17	16	27	33.02	130.53	19	3.9
1983	7	31	20	34	51	32.94	132.41	32	3.8
1983	8	9	13	0	18	39.5	125.9	0	2.7
1983	8	12	10	32	8	32.25	130.73	1	3.6
[truncated: 28,913 more rows]
