# Supplementary material for: An updated, homogeneous, and declustered earthquake catalog for South Korea and neighboring regions
Source: Copernicus journal article supplement (doi:10.5194/nhess-25-4021-2025), 2025-10-20
Supplement: Supplementary file 7 [file Table S4_Mainshocks_Reasenberg_Method.xlsx]

## Sheet: Mainshocks_reasenberg
Year	Month	Date	Hr	Min	Sec	Latitude	Longitude	Depth	Mw
1905	6	2	14	39	42	34	132	100	7.8
1905	7	7	7	17	0	42	132	100	6.2
1905	8	25	18	46	45	43	129	470	6.8
1909	11	10	15	13	31	32.344	130.65	140	7.6
1913	4	13	15	40	18	31.5	132	35	6.8
1914	1	12	18	28	6	31.5	131	50	7
1917	7	31	12	23	11	42.422	130.24	460	7.5
1918	2	10	5	46	26	43	130	450	6.5
1919	3	14	8	12	49.28	33.618	131.666	91	5.2
1919	4	25	21	22	51.14	32.549	130.253	2	5.3
1919	5	10	14	14	52.17	32.796	130.335	0	5.1
1919	7	2	16	21	0.45	33.031	131.808	10	5.2
1919	12	12	1	44	51.84	33.712	131.656	70	5
1919	12	21	6	41	34.84	31.443	131.796	0	6
1920	2	23	15	33	25.63	33.456	132.421	22	5.3
1920	5	6	18	40	35	43	131.5	520	6.2
1920	5	22	4	19	30.13	32.657	131.99	10	5.4
1920	7	16	19	15	51.83	31.789	132.017	3	5.2
1920	12	19	7	51	14.12	33.048	130.708	0	5.3
1920	12	20	0	12	7.21	32.794	130.202	0	4.5
1921	1	12	23	53	18.5	33.5	131.934	35	4.8
1921	4	19	2	58	54.02	32.476	132.068	36	5.3
1921	4	25	16	11	3.37	33.625	131.911	92	5
1921	9	2	2	22	26.36	32.339	131.442	65	4.4
1921	10	14	4	34	44.69	32.806	131.661	0	5
1921	11	15	13	50	2.35	35.603	130.91	7	5.1
1921	11	15	22	51	27.43	35.116	130.936	0	5
1921	11	16	22	52	35.31	31.217	131.521	40	5.2
1922	1	31	22	17	31.92	41.115	125.54	15	7.3
1922	7	12	13	30	57.79	33.237	131.385	15	4.6
1922	8	9	6	6	59.09	33.793	132.267	14	4.8
1922	12	8	1	50	19	32.629	129.69	15	6.8
1922	12	8	11	2	0	31.5	130	0	6.2
1923	1	11	21	24	25.24	32.098	132.359	44	5.5
1923	1	12	0	56	56.28	32.409	132.183	40	5.3
1923	2	9	1	45	29.4	32.615	129.982	2	4.5
1923	3	3	19	24	33.45	42.031	131.687	632	5.3
1923	4	17	10	28	32.98	32.272	130.771	38	4.8
1923	5	7	11	37	39.27	32.866	130.117	20	4.3
1923	5	26	12	33	3.46	33.006	130.035	0	4.4
1923	7	14	8	56	15	31.5	130	0	6.3
1923	7	22	3	26	48.51	31.334	131.921	9	4.8
1923	7	27	8	37	10.08	42.968	131.619	512	5.6
1923	7	27	8	27	6	43	130	430	6
1923	9	17	7	59	39.43	31.223	131.66	123	5
1923	10	3	23	21	48.66	32.989	131.575	63	5.1
1923	10	11	17	21	9.17	31.279	132.144	0	5.1
1923	11	27	12	21	30.81	31.571	132.213	29	5.7
1923	12	5	8	39	0	32	127.5	0	6.2
1923	12	20	21	47	18.12	32.509	129.968	0	4.8
1924	2	3	2	28	52.2	32.3	129.363	0	5.4
1924	3	24	9	51	54.32	33.487	131.95	38	5.2
1924	4	1	16	3	58.27	31.075	131.201	0	5.3
1924	6	6	18	18	39.84	32.072	131.274	110	5
1924	6	22	9	46	30.43	32.385	129.866	15	4.8
1924	6	30	18	9	34.82	32.414	130.463	2	5.3
1924	7	22	21	42	32.58	32.653	130.042	3	5
1924	8	29	8	50	36	33.5	131	35	6.1
1924	8	29	8	50	36.25	32.841	131.93	0	5.8
1924	11	30	10	21	11.77	31.371	131.823	0	5.5
1924	11	30	10	32	0.88	31.493	131.77	0	5.6
1925	3	9	18	2	49.92	32.796	130.183	0	5
1925	3	16	13	28	36.44	32.326	129.742	13	5.7
1925	4	24	1	11	21.38	33.009	131.581	128	4.8
1925	5	1	15	6	27.89	33.472	132.141	0	4.8
1925	5	1	17	17	14.78	33.647	132.268	1	5.2
1925	5	7	2	3	35.35	33.335	131.838	0	4.3
1925	5	10	4	24	1.31	34.051	131.786	65	4.6
1925	5	24	12	52	16.9	32.74	131.867	0	5.4
1925	6	11	15	45	55.19	33.908	131.228	10	4.6
1925	6	11	15	59	43.13	34.104	131.122	17	4.1
1925	6	27	2	27	25.18	32.107	131.59	0	4.8
1925	7	13	15	9	27.05	33.391	132.213	57	4.5
1925	8	4	6	13	43.73	33.684	131.07	16	4.3
1925	8	10	9	36	52.9	33.431	131.063	0	4.7
1925	9	17	17	9	35.39	32.341	129.143	32	5.4
1925	11	26	23	4	9.54	33.307	131.89	0	4.1
1926	1	22	6	26	53.31	33.337	132.164	10	5.2
1926	1	25	23	39	29.02	31.143	131.626	0	5.3
1926	1	30	20	53	29.27	33.508	131.775	81	4.7
1926	2	13	12	4	25.04	33.368	132.15	41	4.2
1926	4	7	8	45	27.8	31.612	131.804	0	5.3
1926	4	7	8	56	17.99	31.616	131.964	30	5
1926	4	25	17	1	15.31	31.913	131.876	43	4.5
1926	6	5	18	9	39	31	130	180	6.5
1927	1	10	0	19	56.66	32.086	130.139	7	4.3
1927	2	18	21	11	41.25	32.668	130.809	102	4.8
1927	5	8	20	14	53.77	32.096	130.005	32	4.3
1927	5	10	17	39	34.85	33.198	131.384	98	4.4
1927	6	10	2	51	10.38	32.044	130.996	0	4.2
1927	8	9	3	49	55.17	31.94	131.655	142	4.7
1927	8	21	11	35	13.41	32.242	129.987	0	4.4
1927	9	11	15	54	22.57	31.896	131.361	47	4.5
1927	9	14	13	18	56.73	33.796	131.849	33	4.2
1927	10	17	15	4	7.83	31.882	131.738	0	4.9
1927	10	17	15	13	27.75	31.754	131.72	0	4.6
1927	10	18	21	44	37.73	32.163	129.763	9	5.1
1927	10	30	10	0	57.42	32.111	130.383	23	3.9
1927	12	4	21	18	18.75	32.43	130.126	3	5
1927	12	4	12	53	6.12	32.505	129.727	6	5.2
1927	12	4	18	43	10.39	32.552	129.997	24	3.8
1927	12	11	22	12	45.96	32.178	131.256	111	4.3
1928	2	15	1	16	52.5	32.163	130.911	21	3.9
1928	2	15	8	44	41.23	32.443	131.168	14	4.3
1928	2	22	1	28	6.82	32.968	132.084	98	4
1928	2	28	12	33	20	32.571	130.842	9	3.9
1928	3	15	4	7	5.73	32.539	129.725	12	3.9
1928	3	23	5	16	9.82	34.469	132.409	8	4.3
1928	4	16	22	41	29.18	31.35	131.352	65	4.5
1928	4	30	20	3	14.07	31.272	128.751	34	5.2
1928	4	30	20	5	39.18	32.719	129.284	12	4.6
1928	5	30	3	17	32.11	31.923	131.016	107	4.1
1928	6	3	17	31	4	31.639	128.91	10	6.6
1928	6	5	14	55	24.13	31.351	128.607	31	5.4
1928	6	6	18	57	14.13	31.421	129.142	0	4.3
1928	6	14	9	27	34.74	31.053	130.515	113	4.8
1928	7	10	15	20	20.57	32.502	129.609	11	4.7
1928	7	17	2	50	41.07	31.242	129.359	0	4.3
1928	8	22	10	30	32.11	32.732	130.635	6	5
1928	8	22	10	36	13.48	32.742	130.842	8	4.1
1928	8	30	4	3	2.16	32.75	130.754	24	4.1
1928	9	23	11	8	1.65	33.505	131.576	0	4.3
1928	9	25	13	58	42	33.5	132	120	6.1
1928	9	28	17	5	51.61	32.873	130.886	5	4.3
1928	11	5	13	40	55.59	33.362	131.124	40	4.7
1928	11	16	12	13	32.8	32.553	129.747	3	4.4
1928	11	17	18	52	8.69	33.079	130.982	0	4.1
1928	12	4	1	32	37.53	32.008	128.51	32	5
1928	12	10	6	20	16.04	33.146	129.616	24	4.5
1928	12	21	0	8	5.24	32.873	129.607	0	4.1
1928	12	22	4	36	31.74	33.008	130.764	0	4.2
1928	12	22	8	17	32.22	33.079	131.108	18	4.6
1928	12	29	2	10	44.86	33.295	130.777	43	3.9
1928	12	30	14	25	10.06	32.109	128.757	0	4.5
1929	1	2	1	40	6.27	33.121	130.867	4	5.3
1929	1	12	0	33	4.66	32.852	130.828	0	4.1
1929	1	18	20	22	48.94	33.329	132.241	21	4.3
1929	1	19	1	16	16.9	33.062	131.035	13	4.1
1929	2	9	21	27	45.74	32.894	130.645	0	5
1929	2	15	21	0	54.01	32.908	130.636	2	4
1929	3	15	19	13	43.27	32.87	132.234	18	4.5
1929	3	21	5	3	22.92	34.376	129.423	0	4.8
1929	3	25	12	20	26.31	33.448	132.223	18	4.2
1929	4	12	9	51	1.88	31.573	130.691	111	4.5
1929	4	15	14	59	2.8	32.493	131.189	121	4.5
1929	5	21	18	14	18.89	33.029	127.508	9	4.6
1929	5	22	1	35	36	31.823	131.57	35	6.8
1929	5	22	9	18	53.79	33.288	127.356	0	4.1
1929	5	24	14	25	35.02	31.78	131.977	23	4.5
1929	5	27	8	0	56.37	31.392	132.068	54	4.6
1929	5	29	8	38	56.49	32.664	130.859	33	3.6
1929	6	9	8	18	11.5	33.172	131.041	0	3.9
1929	6	12	4	32	21	31.878	132.237	60	4.6
1929	6	12	15	9	23.97	32.059	132.103	20	4.4
1929	6	26	17	46	0.63	34.974	131.369	0	4.5
1929	8	4	1	0	4.53	34.232	130.616	9	5.2
1929	8	8	22	29	23.59	33.712	130.496	27	3.9
1929	8	8	22	33	18.88	33.539	130.273	9	5
1929	8	16	15	16	29.87	32.537	132.02	39	4.3
1929	8	31	12	2	53.88	34.177	131.387	14	4.1
1929	8	31	12	7	28.66	34.281	131.274	37	4.4
1929	9	5	21	56	4.09	33.838	132.194	13	4.1
1929	9	17	6	34	30.02	31.276	131.578	8	4.3
1929	10	1	0	58	36.48	33.558	131.493	122	4.5
1929	10	2	21	36	38.76	32.546	129.287	0	4.5
1929	10	10	4	45	25.56	33.148	131.33	140	4.7
1929	10	25	3	57	19.99	32.612	130.458	39	4.8
1929	10	25	21	34	3.19	32.745	130.145	3	4.2
1929	11	2	1	2	56.48	31.707	131.903	57	4.5
1929	12	18	13	2	36.47	35.831	129.713	19	4.3
1929	12	21	10	47	33.54	33.79	132.211	24	4.1
1929	12	26	18	0	30.82	32.258	132.169	11	4.7
1930	1	2	11	57	35.45	32.793	130.105	0	4.4
1930	1	11	3	14	20.24	31.643	131.884	37	5
1930	1	15	12	35	18.67	32.631	129.936	0	4.3
1930	1	25	11	34	17.16	32.771	131.281	169	4.7
1930	2	5	22	28	22.73	33.462	130.313	0	4.9
1930	2	27	21	11	13.88	32.295	131.81	0	4.5
1930	3	20	0	29	41.2	32.098	132.07	4	4.6
1930	3	23	7	10	24.37	32.756	130.036	19	4.2
1930	3	27	4	11	45.51	33.64	132.441	6	4.1
1930	3	31	5	9	23.34	33.376	132.015	46	4.6
1930	4	4	3	30	10.38	33.624	132.341	40	4.3
1930	4	25	21	31	37.59	33.232	131.358	0	4.5
1930	4	25	23	17	12.01	33.274	131.175	16	4.3
1930	6	14	18	24	43.75	32.915	129.589	39	4
1930	6	19	5	45	49.83	32.117	131.917	0	4.7
1930	6	21	18	47	25.23	32.082	132.42	0	4.8
1930	7	10	13	14	58.77	33.797	132.434	86	3.9
1930	7	18	18	42	44.93	32.991	130.958	5	4.3
1930	7	18	19	22	1.48	32.931	130.89	6	4.6
1930	9	29	13	52	26.03	31.232	129.804	284	5
1930	10	7	5	51	11.52	33.588	131.962	63	4.3
1930	10	21	14	25	18.39	33.46	132.25	77	4.8
1930	11	28	6	54	24.23	32.303	131.12	136	4.3
1930	12	12	2	12	10.57	33.46	131.706	84	4.3
1930	12	13	1	1	55.89	32.941	130.903	14	4.3
1930	12	13	4	42	55.72	33.044	130.799	10	4.3
1930	12	13	15	21	2.14	33.046	130.718	0	4
1930	12	18	19	41	16.25	31.986	129.05	7	4.5
1931	1	15	22	38	54.67	32.79	130.491	3	4.8
1931	1	31	0	46	22.57	33.76	132.332	50	4
1931	2	26	5	30	3.06	31.988	132.356	3	4.6
1931	3	8	6	40	13.34	32.875	131.888	40	4.1
1931	3	17	18	46	6.39	31.183	130.54	148	4.7
1931	4	28	17	47	26.95	33.089	131.066	8	4.3
1931	6	29	1	9	17.49	31.111	131.008	0	4.5
1931	6	29	14	22	26.8	33.332	132.12	44	4
1931	7	24	20	37	52.72	31.904	131.816	0	4.3
1931	8	12	20	20	31.35	32.857	130.57	7	3.8
1931	9	21	7	42	50.88	33.555	131.938	84	4.3
1931	9	22	17	36	11.11	31.951	131.94	35	4.7
1931	9	24	23	12	49.54	32.571	130.624	17	3.8
1931	10	8	7	6	8.92	33.703	132.181	71	4.1
1931	10	30	19	31	53.2	33.041	131.979	75	4
1931	11	2	19	3	4	31.899	132.01	35	7.5
1931	11	4	0	24	8.93	32.213	132.061	12	4.4
1931	11	14	13	29	22.09	33.565	132.273	69	4.3
1931	11	16	21	38	58.31	32.577	130.021	17	4.3
1931	12	15	8	50	28.63	32.485	132.295	3	4.3
1931	12	19	2	45	45.19	31.765	131.71	0	4.8
1931	12	21	13	32	18.69	32.063	132.02	0	4.2
1931	12	21	14	47	11.41	32.487	130.488	0	5.3
1931	12	22	22	7	54.23	32.504	130.502	15	5.3
1931	12	23	6	12	39.32	32.506	130.576	20	4.3
1931	12	26	10	42	53.23	32.494	130.529	17	5.5
1931	12	29	11	49	59.76	32.488	130.529	12	4.5
1932	1	3	6	53	19.46	31.144	131.634	36	4.8
1932	1	3	12	11	14.4	31.573	131.368	47	4.3
1932	1	5	17	21	21.54	34.154	131.735	26	4.1
1932	1	21	23	42	54.47	31.352	130.765	162	4.8
1932	1	27	21	15	56.63	32.067	131.914	8	4.9
1932	1	28	3	41	45.77	32.62	131.899	0	4.3
1932	1	31	14	29	29.92	31.977	131.871	30	4.4
1932	2	3	18	35	14.68	31.382	129.376	61	4.4
1932	2	13	6	33	14.48	33.369	132.181	0	4.2
1932	2	15	6	32	24.92	31.102	130.583	137	4.7
1932	2	15	10	6	37.94	31.788	132.125	50	4.2
1932	2	28	8	59	20.84	34.521	132.031	1	4.4
1932	3	5	17	49	19.79	33.335	132.097	55	4.2
1932	3	14	22	52	23.99	35.439	123.404	0	4.7
1932	3	17	14	1	36.68	33.869	130.304	27	4
1932	3	18	7	56	35.4	31.933	132.109	83	4.1
1932	4	22	4	1	23.59	32.608	130.552	8	3.9
1932	5	3	8	29	12	31.5	131	35	5.8
1932	6	8	15	13	58	31.5	132	35	5.8
1932	6	8	19	54	0	31.5	132	35	5.8
1932	6	18	10	31	25.39	32.616	132.091	0	5.3
1932	8	23	15	31	22.84	32.691	130.831	17	3.8
1932	8	24	0	4	21.48	32.304	132.171	0	4.5
1932	8	24	22	18	10.97	32.613	130.584	122	4.1
1932	8	24	22	51	7.14	33.274	130.461	0	3.9
1932	8	26	22	52	55.02	31.283	131.329	0	4.5
1932	9	29	12	42	43.28	33.973	130.501	8	4.4
1932	9	29	15	49	30.4	33.371	132.348	5	4.1
1932	10	1	18	22	14.36	32.583	130.471	7	3.8
1932	10	2	20	51	3.16	33.912	130.535	22	4.2
1932	10	5	12	21	57.49	33.228	132.101	72	4.1
1932	10	27	17	36	45.71	33.456	131.648	60	4.2
1932	11	9	4	32	43.83	33.767	132.396	59	4.1
1932	11	18	5	11	40	31	130.5	100	5.6
1932	11	29	15	21	49.2	32.653	130.897	24	3.8
1932	11	30	5	14	57.18	32.17	132.106	3	4.6
1932	12	21	14	54	28.2	32.83	130.596	11	3.8
1932	12	30	5	33	22.89	32.805	131.333	121	4.1
1933	1	14	11	10	28.75	32.918	130.995	5	4.4
1933	1	14	15	33	24.47	32.906	131.026	5	4.2
1933	1	15	18	55	21.49	31.246	131.223	0	4.6
1933	1	16	18	22	3.42	31.736	129.935	0	4
1933	1	27	3	33	28.36	32.859	131.06	0	4.2
1933	2	4	15	43	15.77	32.857	130.978	9	3.8
1933	2	6	16	17	3.18	32.966	131.024	11	4.5
1933	2	7	10	27	35.18	32.969	131.06	0	4.5
1933	2	9	6	56	7.45	32.905	130.986	6	4.2
1933	2	11	4	50	43.88	32.933	130.996	13	3.9
1933	2	12	9	45	55.51	32.791	130.757	14	3.6
1933	2	13	22	1	7.94	32.953	131.097	4	4.1
1933	2	17	4	20	49.96	32.002	130.779	25	4.2
1933	3	10	16	29	24.45	32.721	130.545	20	3.7
1933	3	10	21	25	18.97	32.938	130.876	7	3.9
1933	3	16	10	45	0.18	33.032	130.873	14	4.1
1933	3	21	2	8	58.15	33.371	132.024	49	4.2
1933	3	22	8	18	16.99	32.906	130.952	7	4.6
1933	3	23	5	49	32.64	32.937	130.701	19	3.9
1933	3	25	21	50	20.83	32.84	130.945	12	4.9
1933	3	29	12	50	54.32	31.121	131.028	17	4.3
1933	4	2	21	44	15.31	32.954	130.854	0	3.9
1933	4	8	20	54	25.55	32.708	130.648	1	4.4
1933	4	11	7	15	21.44	32.033	131.573	49	4.1
1933	4	13	12	52	57.47	32.976	130.874	15	4.4
1933	4	13	15	55	26.56	32.865	130.587	13	3.6
1933	4	15	20	33	14.93	32.967	130.786	0	3.6
1933	4	16	4	45	25.68	32.992	130.886	5	4.1
1933	4	25	2	57	47.43	32.951	130.962	5	3.6
1933	4	25	3	1	10.82	32.991	130.949	2	4
1933	5	5	20	38	20.37	33.003	130.924	0	4.5
1933	5	5	21	41	30.41	32.962	131.2	0	4.1
1933	5	7	20	44	14.81	31.297	131.842	45	4.5
1933	5	11	13	29	55.14	31.582	132.188	0	4.3
1933	5	15	10	11	10.17	32.941	131.143	0	4.1
1933	5	15	10	17	45.44	32.905	131.131	0	4.3
1933	5	16	15	32	4.64	31.147	131.4	0	4.5
1933	5	23	5	44	4.93	31.697	131.771	46	4.8
1933	5	24	1	51	50.19	31.175	131.721	73	5
1933	5	25	3	39	33.4	32.31	131.847	3	4.1
1933	6	2	16	38	45	31	131.5	35	6.2
1933	6	3	19	32	38.39	31.166	131.31	0	4.5
1933	6	3	22	31	0.91	32.965	131.108	14	4.2
1933	6	5	11	57	26.07	33.507	132.362	47	4.1
1933	6	13	7	17	29.17	32.736	130.717	1	3.9
1933	6	16	19	43	21.99	33.944	132.469	0	4.1
1933	7	10	1	55	56.28	33.357	131.504	0	4.3
1933	7	10	2	0	18.27	33.449	131.334	0	4
1933	7	15	1	3	35	43	131	530	5.8
1933	7	24	17	37	57	42.5	131	550	6
1933	8	16	13	10	35.37	32.774	130.795	15	4.3
1933	8	19	3	48	37.36	32.876	130.894	0	3.9
1933	8	29	15	39	38.35	33.166	130.538	20	4.3
1933	9	1	16	23	21.55	32.958	130.598	0	3.9
1933	9	10	6	18	54.49	32.504	130.558	20	3.8
1933	9	10	6	54	15.34	32.564	130.54	14	3.7
1933	9	18	22	25	9.97	31.513	128.819	0	4.5
1933	9	24	22	49	16.75	33.408	132.206	25	4.1
1933	9	27	0	58	53.78	32.862	130.933	5	4.3
1933	9	27	2	39	34.82	31.884	130.866	156	4.3
1933	9	29	22	58	42.71	32.906	130.929	4	4.1
1933	10	2	4	24	4.31	32.871	131.379	115	4.5
1933	10	2	21	52	28.35	32.855	130.892	8	3.9
1933	10	4	19	59	54.79	31.972	131.816	3	4.3
1933	10	6	6	32	8.67	32.742	130.048	0	3.9
1933	10	21	13	44	10.41	32.973	131.535	4	4.1
1933	10	23	14	46	0.14	32.081	132.058	7	4.3
1933	11	1	21	3	42.09	33.008	131.086	0	3.9
1933	11	6	16	25	9.4	32.764	128.607	10	4.7
1933	11	10	2	21	40.76	32.753	130.777	7	4.1
1933	11	10	22	1	10.93	32.759	130.746	21	3.4
1933	11	20	8	4	19.75	32.792	130.831	9	3.9
1933	12	4	17	30	44.95	31.44	132.126	0	5
1933	12	12	2	25	44.99	32.442	130.125	0	4.1
1934	1	9	10	45	35.1	31.824	132.139	8	4.3
1934	1	10	8	39	21.39	34.351	132.036	14	3.9
1934	1	15	6	36	14	33.012	130.891	9	3.9
1934	1	21	8	44	3.8	32.2	131.288	92	4.5
1934	1	24	3	56	44.9	32.233	131.697	0	4.5
1934	1	29	10	38	46.34	32.994	130.896	15	5.1
1934	1	29	16	23	15.65	33.017	130.868	12	3.7
1934	1	31	9	53	50.9	32.91	131.335	13	4.1
1934	2	22	12	51	15.66	31.137	131.649	0	4.3
1934	3	13	10	18	7.49	31.791	132.264	0	4.5
1934	3	30	23	53	59.55	31.739	132.13	43	4.8
1934	4	6	9	22	14.14	32.7	130.938	15	4.3
1934	4	10	15	54	11.17	33.619	131.795	44	4.2
1934	4	18	20	56	31.19	32.127	131.902	41	4.5
1934	4	28	11	1	21.64	33.547	130.315	15	4.3
1934	5	11	9	0	19.09	33.66	131.907	32	4.2
1934	5	13	9	15	38.19	34.47	131.743	9	4.2
1934	5	17	22	57	3.06	33.557	131.905	3	4
1934	5	18	20	17	29.26	32.708	129.758	15	4.3
1934	5	30	16	1	33.78	31.847	130.592	201	4.5
1934	6	3	6	29	0.49	31.485	131.884	16	5.1
1934	6	6	8	53	39.64	32.903	130.546	5	3.9
1934	6	7	22	31	59.02	32.922	130.565	4	3.9
1934	6	19	17	52	18.04	32.62	130.757	14	3.8
1934	6	24	23	59	6.66	33.153	131.583	49	4.2
1934	6	27	5	34	16.93	33.358	131.85	12	4.5
1934	7	1	14	11	8.29	32.337	132.223	0	4
1934	7	10	15	58	10.58	32.093	131.979	15	4.5
1934	7	27	11	57	50.96	30.998	131.896	9	4.8
1934	8	4	1	38	41.93	33.274	131.72	68	4
1934	8	20	17	24	23.13	34.003	132.267	14	4.1
1934	8	22	21	57	56.73	31.065	130.203	142	4.3
1934	9	1	8	5	30.58	33.744	131.294	0	4.6
1934	9	1	11	44	51.81	32.005	131.867	20	4.5
1934	9	12	23	27	8.67	31.104	130.224	40	4.6
1934	9	14	7	55	47.59	31.018	130.396	0	4.5
1934	9	15	4	36	40.02	31.125	130.524	20	4.3
1934	9	16	10	29	33.12	32.913	130.633	18	3.9
1934	10	7	16	50	57.73	31.005	131.781	20	4.6
1934	10	14	22	48	5.19	31.844	131.809	87	4.2
1934	10	18	13	43	46.18	32.013	130.092	1	4.4
1934	10	23	16	46	14.32	32.618	131.182	138	4.4
1934	10	27	21	39	21.24	33.187	131.122	2	4.1
1934	10	28	2	4	40.48	33.157	131.103	13	4.1
1934	11	14	21	17	56.23	32.053	130.118	0	4
1934	12	3	12	26	55.41	32.109	131.848	0	4.5
1934	12	13	8	37	17.22	31.269	131.656	0	4.2
1934	12	19	5	35	7.73	32.091	131.696	0	4.5
1934	12	22	9	40	59.32	33.297	132.419	31	4.2
1934	12	23	16	13	21.83	32.125	131.827	0	4.4
1935	1	22	9	33	9.62	31.578	129.431	2	4.8
1935	2	5	5	9	59.31	33.698	132.305	82	4.2
1935	2	14	2	7	37.1	31.948	132.01	17	4.1
1935	2	17	20	5	17.48	31.595	131.392	66	4.1
1935	3	6	18	47	17.19	33.112	131.136	15	4
1935	3	7	19	41	11.78	33.088	131.208	14	4.6
1935	3	8	5	24	17.74	32.853	130.925	27	4.2
1935	3	8	9	45	7.81	32.974	130.978	29	4.3
1935	3	14	21	2	40.78	32.971	130.893	18	3.7
1935	3	19	22	30	39.8	33.095	131.166	9	4.1
1935	3	20	9	16	40.74	33.17	131.208	2	4.1
1935	3	26	4	33	30.41	31.81	132.237	6	4.5
1935	3	29	8	47	51	43	131	550	6.2
1935	3	30	9	3	56.22	34.334	132.338	21	3.9
1935	4	14	19	49	17.39	32.737	132.005	0	4.3
1935	4	17	15	56	45.55	32.898	132.03	0	3.9
1935	4	21	23	27	52.73	34.576	132.195	14	4.1
1935	4	28	22	32	1.67	31.041	130.12	137	4.1
1935	5	8	5	8	1.68	33.501	131.739	32	3.8
1935	5	18	13	9	35.49	31.359	131.505	138	4.5
1935	5	23	15	10	11.61	32.859	131.825	73	4.9
1935	6	30	0	46	51.26	32.011	131.437	11	3.9
1935	7	3	9	16	37.09	32.062	131.386	11	4.4
1935	7	3	9	19	5.99	31.786	131.175	8	4.7
1935	7	4	7	20	54.13	33.389	132.102	33	3.8
1935	7	17	0	0	28.02	34.586	131.03	20	5.3
1935	7	17	1	43	43.13	34.608	131.011	11	4.3
1935	7	18	5	33	1.34	32.517	132.024	40	3.9
1935	7	19	7	25	54.88	31.646	130.861	24	4.1
1935	8	18	8	24	36.74	32.418	132.36	5	4.4
1935	8	19	6	21	41.9	32.616	130.423	0	3.9
1935	9	9	14	13	19.6	32.189	130.119	13	4.9
1935	9	10	10	9	14.21	32.248	130.15	13	4.1
1935	9	10	23	22	30.15	33.942	132.087	27	4.1
1935	9	12	20	0	19.53	32.192	130.19	2	4.3
1935	9	14	16	58	13.15	32.23	130.236	4	3.9
1935	10	2	18	27	46	31	130	120	5.6
1935	10	3	13	30	45.7	32.823	131.703	7	4.1
1935	10	4	11	5	53.4	32.771	131.574	0	3.9
1935	10	16	3	23	5.86	32.159	130.121	12	4.3
1935	10	20	10	14	39.43	33.301	131.966	16	4.1
1935	11	9	13	0	6.52	31.048	130.244	148	4.7
1935	11	23	9	14	25.46	33.394	130.866	12	4.3
1935	11	25	12	37	11.41	31.936	130.603	172	4.1
1935	12	19	12	55	4.38	33.342	132.204	54	4.1
1935	12	28	12	29	24.99	32.099	131.764	0	4.2
1936	1	1	2	50	47.12	32.805	131.351	116	4.3
1936	1	15	10	16	10.29	32.973	130.638	0	3.8
1936	1	19	2	22	51.5	32.45	130.438	4	4.3
1936	1	30	21	51	21.86	31.412	131.357	0	4.1
1936	2	1	3	52	43.85	42.942	131.311	550	4.9
1936	2	6	17	0	24.01	34.247	132.269	0	3.9
1936	4	6	2	36	16.37	32.037	131.851	60	4
1936	4	14	10	19	50.39	32.797	131.662	2	4.4
1936	4	21	18	7	41.25	33.874	132.345	0	3.9
1936	5	24	20	8	17.88	32.498	130.583	6	4.3
1936	5	25	10	17	41.01	31.648	131.266	35	4.5
1936	5	27	0	36	16.66	31.268	130.769	113	4.5
1936	6	5	6	15	12.69	32.82	131.764	4	3.9
1936	7	4	6	2	19.23	36.004	129.704	32	4.9
1936	7	12	0	58	10.14	32.712	132.137	8	4.1
1936	7	26	14	44	11.54	33.584	131.902	90	4.1
1936	8	27	14	23	45.32	32.057	131.122	14	3.9
1936	10	10	23	12	11.77	32.939	130.923	14	4.1
1936	11	2	18	37	7.67	32.909	130.563	3	4.2
1936	11	5	20	15	13.96	32.35	130.687	27	4.4
1936	11	7	1	23	45.44	33.174	132.032	0	4.1
1936	11	14	11	7	27.57	31.733	130.074	30	3.9
1936	11	28	17	20	12.38	34.371	131.736	10	3.8
1937	1	4	19	30	53.47	33.135	130.817	9	3.7
1937	1	5	16	0	17.23	32.737	130.683	3	4.4
1937	1	6	6	38	2	31.048	132.43	20	6.5
1937	1	6	6	51	55.51	31.046	132.295	115	4.9
1937	1	6	10	2	22.98	31.974	132.229	0	4.3
1937	1	8	23	49	38.83	31.226	132.427	94	4.5
1937	1	9	18	21	37.75	31.477	131.71	41	4.1
1937	1	23	17	27	35.9	33.427	132.336	72	4.2
1937	1	23	17	49	46.7	33.076	131.454	109	4.8
1937	1	28	9	43	42.53	32.708	130.711	0	5
1937	2	1	10	15	1.52	32.666	130.651	9	4
1937	2	4	19	20	24.35	33.533	132.222	76	3.9
1937	2	4	19	29	5.64	33.519	132.184	20	3.9
1937	2	6	10	23	41.2	31.785	131.873	1	4.5
1937	2	8	21	18	22.65	33.41	132.032	24	4.9
1937	2	11	12	12	37.8	32.066	131.094	97	4.6
1937	2	12	16	28	42.88	32.474	131.462	0	4.2
1937	2	14	10	5	15.92	33.125	132.106	57	5
1937	2	21	13	6	57.38	32.772	130.771	4	3.4
1937	2	26	22	54	29.92	33.365	132.026	1	3.9
1937	2	27	23	41	58.1	33.862	132.116	63	5.7
1937	3	9	15	41	52.54	32.84	130.938	7	4.2
1937	3	14	20	15	37.82	31.114	131.41	45	4.5
1937	3	16	2	45	18.52	36.342	126.521	0	4.1
1937	3	23	1	59	19.68	31.827	131.998	0	4.8
1937	5	4	0	50	34.48	33.476	131.965	38	4.8
1937	5	20	6	17	57.5	33.3	132.097	52	4.1
1937	6	2	6	39	10.58	32.692	130.749	12	3.8
1937	6	13	13	33	57.18	31.636	131.948	0	4.7
1937	6	13	16	21	6.37	32.013	131.538	16	4.5
1937	6	20	5	17	52.29	31.822	131.617	6	4.6
1937	6	21	3	40	58.83	34.955	132.312	0	4.1
1937	6	23	6	5	31.29	31.731	131.218	28	4.2
1937	6	23	11	7	59.53	31.905	131.163	23	4.6
1937	6	24	5	41	39.74	31.509	131.53	52	5.1
1937	6	24	6	32	39.82	31.653	131.459	35	4.3
1937	6	27	12	26	18.86	31.416	131.69	59	4.5
1937	7	3	22	50	56.25	31.496	131.565	55	4.6
1937	7	9	20	27	49	32.529	130.301	0	4.1
1937	7	9	13	8	5.88	32.695	129.996	0	4.8
1937	7	12	18	54	31.81	31.531	131.495	44	4.1
1937	7	14	17	50	21.3	31.778	131.122	0	3.9
1937	7	29	17	34	33.97	32.732	130.703	9	3.4
1937	8	8	5	46	35.37	30.999	131.408	1	4.8
1937	8	12	16	59	28.58	31.766	131.339	49	4.2
1937	8	20	5	31	47.86	31.379	131.338	13	4.8
1937	8	22	14	28	42.5	31.893	131.701	44	4.3
1937	8	27	3	54	10.92	31.233	131.799	42	5.7
1937	8	29	16	6	23.19	31.131	131.663	57	4.8
1937	9	7	15	3	56.37	32.962	131.096	15	3.9
1937	9	8	19	8	25.35	32.12	129.856	3	4.3
1937	9	9	17	22	22.42	33.76	132.16	39	4.1
1937	9	19	9	52	18.47	33.079	131.24	10	4.5
1937	9	21	6	18	46.68	33.498	131.991	7	4.2
1937	9	24	0	44	12.7	32.728	130.637	9	4.4
1937	10	2	0	18	13.45	32.134	130.052	2	4.3
1937	10	2	20	26	55.2	34.112	130.16	0	4.1
1937	10	4	5	37	24.76	32.115	131.805	23	4.7
1937	10	12	13	33	51.5	32.13	129.811	11	4
1937	10	25	12	29	2.61	31.52	131.136	0	4.3
1937	10	26	7	50	9.61	32.102	129.824	5	4.3
1937	10	28	22	12	13.51	32.105	129.863	6	4.3
1937	11	3	3	20	48.11	32.413	131.769	0	4.1
1937	11	3	13	59	18.57	32.012	131.776	4	4
1937	11	9	10	17	38.1	31.866	131.002	112	4.3
1937	11	10	18	20	17.69	32.197	132.055	0	4.4
1937	11	20	11	14	26.41	33.278	131.408	115	3.9
1937	11	29	14	43	37.57	31.683	132.018	82	4.1
1937	12	10	22	15	23	31.262	131.978	9	4.5
1937	12	14	16	16	39.42	32.026	129.811	23	4.5
1937	12	15	23	27	28.02	34.788	131.396	24	4.3
1937	12	15	5	42	48.1	32.087	129.798	24	4.2
1937	12	25	22	52	14.68	32.654	132.344	56	5.3
1938	1	8	14	50	59.31	33.686	132.014	71	4.6
1938	1	19	14	12	53.39	31.515	130.987	84	4.6
1938	1	20	1	49	8.39	31.828	131.17	0	3.9
1938	1	23	3	21	7.46	32.742	130.667	7	3.6
1938	1	27	15	7	58.48	31.415	131.406	54	4.5
1938	2	8	17	15	35.07	32.825	130.557	7	3.8
1938	2	15	17	32	40.56	32.531	129.833	8	4.3
1938	2	19	1	22	14.95	31.112	130.403	159	4.2
1938	2	28	7	42	47.29	31.995	131.03	10	4.2
1938	3	1	15	0	4.87	31.504	131.387	43	4.8
1938	3	5	2	9	0.85	32.035	131.041	7	4.3
1938	3	7	23	18	35.24	31.464	130.335	144	4.6
1938	3	17	5	39	33.53	33.727	132.248	2	4.3
1938	3	28	22	5	26.69	31.768	130.23	0	4.9
1938	4	22	21	15	0.92	31.252	130.316	149	4.1
1938	6	1	12	43	42.27	34.187	132.406	46	3.7
1938	6	9	22	5	59.31	31.561	131.773	18	4.2
1938	8	10	18	9	37.03	31.046	131.682	59	4.8
1938	8	12	12	0	29	33.25	132.073	76	4.3
1938	8	13	7	25	15.18	32.867	130.666	5	4.4
1938	8	22	9	46	27.08	35.271	127.701	11	4.8
1938	8	26	8	38	25.85	33.475	131.76	8	4.3
1938	10	1	13	4	1.96	33.4	132.219	22	4.2
1938	10	8	8	59	48.16	32.765	130.593	5	4
1938	10	8	17	17	4.72	32.848	131.971	68	4.4
1938	10	13	1	59	28.01	33.734	132.262	27	3.9
1938	12	19	19	26	7.03	33.955	132.261	8	3.7
1938	12	30	5	56	50.1	31.57	132.031	20	4.9
1939	1	3	2	13	1.16	32.746	129.97	3	3.9
1939	1	10	10	4	0.7	36.49	127.063	5	4.4
1939	1	22	1	19	37.08	32.572	130.527	29	3.9
1939	2	19	2	44	59.69	31.17	131.189	33	4.8
1939	2	27	0	49	37.14	33.086	131.786	76	4.2
1939	3	18	4	18	39.91	32.4	130.776	40	4
1939	3	20	12	22	28	32.508	131.69	25	6.7
1939	3	21	15	17	40.09	32.274	131.564	40	4.1
1939	3	22	7	43	1.44	33.314	132.18	64	4.3
1939	3	27	22	28	14.7	32.322	131.837	31	4.3
1939	3	30	18	53	55.76	32.477	131.74	5	4.5
1939	4	3	9	1	53.94	33.724	132.236	12	4
1939	4	6	22	50	25.38	33.097	132.086	37	3.7
1939	4	15	0	57	11.65	33.757	131.722	94	4.6
1939	5	30	19	34	37.34	32.04	131.063	104	4.8
1939	6	6	3	32	28.26	33.456	132.329	5	3.6
1939	6	21	16	40	30.79	31.174	131.196	0	4.8
1939	6	29	20	57	59.86	33.53	131.827	74	4
1939	6	29	23	13	2.3	31.682	132.218	55	4.8
1939	7	9	21	55	58	32.657	132.135	25	5.2
1939	7	11	15	54	41	32.712	132.162	2	4.7
1939	7	30	15	31	9.83	32.723	132.157	28	4.3
1939	8	4	7	30	20.56	33.413	130.316	23	4.1
1939	8	31	14	7	53.77	36.377	127.115	8	4.7
1939	9	1	20	17	36.14	34.199	131.542	14	3.7
1939	9	2	9	35	58.29	32.772	132.166	0	4.3
1939	9	7	9	33	23.28	33.609	132.184	59	3.7
1939	9	10	19	50	21.25	32.704	130.144	5	3.9
1939	9	24	10	3	56.47	32.777	130.365	21	3.4
1939	10	24	6	23	2.81	31.417	130.627	173	4.3
1939	10	26	5	2	58.89	32.816	132.074	22	4.5
1939	10	29	12	6	3.45	32.366	132.025	54	4.1
1939	11	4	2	19	8.39	33.556	132.435	4	3.6
1939	12	27	17	54	21.7	33.393	130.785	4	4.1
1940	1	7	13	3	30.15	31.398	131.539	24	4.3
1940	1	7	13	34	43.05	31.481	131.27	0	4.3
1940	1	11	12	22	43.89	33.297	131.353	0	3.9
1940	1	19	6	28	8.21	33.611	131.99	58	4.1
1940	1	19	14	23	43	43	122	35	6.1
1940	1	29	2	52	46.52	32.641	131.302	122	4.7
1940	2	4	4	31	47.48	33.544	132.37	24	4.1
1940	2	10	11	32	52.47	31.369	130.062	9	4
1940	2	22	20	19	3.78	33.122	131.14	10	3.9
1940	2	23	2	57	40.01	34.295	131.391	4	4.4
1940	2	28	5	47	39.29	32.687	131.922	86	4.1
1940	3	2	4	6	56.14	34.268	130.666	12	3.9
1940	3	4	9	39	11.27	33.552	132.208	22	3.9
1940	3	26	17	46	29.09	31.312	131.346	0	4.5
1940	4	10	23	22	31.26	32.271	131.854	0	4.2
1940	4	17	6	48	34.91	31.209	129.975	139	4.4
1940	4	22	8	59	34.34	33.345	132.369	37	4.1
1940	4	25	7	5	38.6	34.81	131.896	33	3.6
1940	5	1	9	19	55.39	33.71	132.045	60	4.2
1940	5	14	14	50	26.8	33.227	131.903	14	4.1
1940	6	5	22	35	40.04	33.226	131.016	5	4.2
1940	6	12	17	6	28.89	33.596	132.33	7	3.6
1940	7	2	2	35	33.95	33.388	131.905	1	4.1
1940	7	4	10	43	34.93	32.775	131.997	38	3.8
1940	7	6	17	0	48.3	31.86	132.175	11	4.6
1940	7	22	11	47	14.54	33.713	131.043	14	4.1
1940	8	5	9	52	59.61	33.495	132.272	7	4.4
1940	8	6	3	28	13.96	34.335	131.824	12	4.1
1940	8	14	0	36	48	36.019	132.28	10	7
1940	8	14	1	42	13.96	36.133	132.204	0	4.8
1940	8	16	14	14	48.12	36.297	132.18	6	4.8
1940	8	26	16	2	50.46	36.086	132.138	0	4.5
1940	9	29	22	4	50.65	34.026	131.797	14	4.1
1940	10	17	1	5	2.04	31.851	131.19	86	4.4
1940	10	19	0	0	47.74	31.874	131.855	37	4.8
1940	11	1	8	51	6.64	33.448	131.872	72	3.8
1940	11	4	15	8	43.91	32.673	130.015	13	2.9
1940	11	10	19	5	12.64	31.976	132.049	53	4.7
1940	11	14	19	59	1.34	32.739	129.691	6	4.6
1940	12	4	20	14	43.75	33.732	132.36	52	4.3
1940	12	6	10	22	4.05	33.264	132.104	44	3.9
1940	12	14	10	40	9.76	31.243	131.451	4	4.9
1941	1	13	23	8	1.73	32.692	131.633	21	3.9
1941	1	18	4	34	23.66	31.75	131.911	0	4.5
1941	1	23	19	3	15.34	31.343	130.14	0	4.4
1941	1	27	10	45	18.07	31.647	131.878	64	4.4
1941	1	29	1	53	5.88	33.637	131.967	18	4.1
1941	2	4	0	40	42.61	32.359	131.017	79	3.9
1941	2	27	23	14	14.77	31.58	131.047	1	4.5
1941	3	7	16	16	27.01	33.42	132.289	23	4.1
1941	3	13	18	52	32.92	32.863	130.78	21	3.8
1941	3	13	19	15	46.32	31.826	131.813	0	3.8
1941	3	14	11	59	51.22	32.904	130.921	5	4.1
1941	4	6	1	49	48	34.5	131.75	60	6
1941	4	8	4	47	37.77	34.569	131.689	2	4
1941	4	10	16	20	42.11	32.581	131.474	43	4.3
1941	4	17	15	19	10.34	34.505	131.743	0	3.9
1941	5	6	23	56	44.79	32.591	131.976	13	3.9
1941	5	8	1	41	12.19	32.346	131.949	0	3.9
1941	5	11	1	45	0.77	31.208	131.744	1	4.3
1941	5	15	23	45	39.16	31.929	131.991	2	4.1
1941	5	26	15	35	6.84	32.709	130.475	64	3.6
1941	6	21	4	36	0.7	33.263	131.818	11	4
1941	7	11	1	50	28.65	33.445	132.144	25	4.1
1941	7	14	22	26	1.29	33.626	132.062	50	4.4
1941	7	20	0	13	14	32	131.75	35	6.2
1941	7	24	9	36	30.44	31.068	131.618	0	4.9
1941	8	11	19	7	38.7	33.453	131.568	116	4
1941	10	1	5	46	59.37	32.199	132.118	62	4.5
1941	10	25	7	40	21.43	32.505	130.61	16	4.4
1941	10	26	10	10	51.59	32.536	130.456	8	3.9
1941	10	31	23	8	37.14	32.557	129.33	0	4.7
1941	11	14	6	33	13.44	31.958	132.23	54	5.3
1941	11	14	13	24	11.52	31.746	132.288	14	4.3
1941	11	14	15	34	12.91	31.801	132.214	11	4.3
1941	11	17	16	22	46.35	32.084	132.071	0	4.2
1941	11	19	1	46	33	32.095	131.95	35	7.9
1941	11	20	8	28	43.28	31.783	131.84	15	4.1
1941	11	20	9	32	38.23	31.953	132.107	27	4.6
1941	11	20	14	27	10.85	32.061	131.801	39	4.5
1941	11	22	14	26	23.05	32.318	132.405	18	4.4
1941	11	28	7	14	4.34	31.379	131.156	57	4.4
1941	11	29	22	33	36.73	31.677	131.633	13	4.7
1941	11	30	3	4	48.28	32.629	132.416	0	4.8
1941	12	1	9	34	43.31	32	131.934	24	4.1
1941	12	5	4	22	55.36	32.437	132.45	0	5
1941	12	12	10	38	2.62	33.096	132.293	10	3.8
1941	12	15	17	18	37.73	42.182	125.064	0	5.7
1942	1	8	15	57	0.94	31.518	131.928	0	4.8
1942	1	25	5	54	38.52	32.078	132.156	0	5.2
1942	2	3	11	32	28.05	33.002	131.453	0	4.5
1942	2	9	17	21	6.9	32.673	131.347	115	4.5
1942	2	18	8	20	47.68	31.796	132.186	36	5
1942	2	22	9	47	14.51	33.531	132.382	68	5.2
1942	2	25	16	42	23.94	33.837	131.764	41	4.2
1942	3	1	2	36	0.97	32.321	131.72	0	4.5
1942	3	6	21	50	50.61	33.084	132.449	3	3.7
1942	3	7	6	16	44.87	31.847	131.834	52	4.3
1942	3	11	4	6	9.9	32.611	132.056	3	5.2
1942	3	17	1	39	33.55	31.248	130.031	140	4.5
1942	3	23	4	17	26.82	32.682	132.228	24	4.3
1942	3	31	19	39	23.37	32.067	131.945	3	4.3
1942	4	2	3	18	29.06	31.204	130.724	132	4.6
1942	4	13	23	6	36.46	31.786	131.832	48	5.7
1942	6	3	14	20	18.99	33.428	131.635	103	4.7
1942	6	8	1	59	40.31	31.107	130.162	117	4.8
1942	6	20	7	28	3.96	31.032	131.511	27	4.8
1942	7	4	11	38	26.64	32.917	130.898	6	3.9
1942	7	9	20	24	30.42	31.991	131.207	0	4.1
1942	7	13	20	53	57.74	31.985	129.948	5	4.3
1942	7	24	6	50	17.98	32.586	131.814	59	4.4
1942	8	11	13	39	49.62	33.655	132.3	20	4
1942	8	14	1	25	55.69	33.13	131.44	101	4
1942	8	21	14	26	38.1	33.201	131.396	17	4.1
1942	8	21	14	28	14.32	33.124	131.232	3	4.3
1942	8	22	18	0	44.25	32.133	132.349	7	5.9
1942	8	23	9	38	31.02	33.708	132.229	44	4.1
1942	8	25	23	54	59.59	32.331	132.195	0	5.7
1942	8	26	0	30	15.88	32.238	132.31	10	4.5
1942	8	28	0	36	22.14	32.304	132.349	0	4.8
1942	8	28	23	2	36.69	32.371	132.21	0	4.3
1942	9	2	19	13	29.92	33.217	131.347	0	4.3
1942	9	15	0	2	19.27	33.83	130.295	0	4.4
1942	9	24	3	0	45.71	33.153	132.101	7	4.5
1942	9	27	5	15	59.97	32.216	132.401	14	4.4
1942	10	27	14	29	32.14	33.323	132.177	42	5
1942	12	6	7	16	4	32.239	132.046	6	4.1
1942	12	17	14	4	29.68	31.763	131.788	5	4.4
1942	12	20	5	40	48.96	33.693	131.711	1	4.3
1942	12	29	21	19	7.17	32.077	131.389	0	3.9
1943	1	7	0	1	48.5	32.006	131.994	0	4.3
1943	2	10	22	44	0.95	32.779	132.159	69	4.1
1943	3	19	15	57	45.71	31.949	132.106	18	4.9
1943	4	12	18	1	37.54	31.837	131.941	33	5.3
1943	4	28	9	56	26.5	33.317	132.133	24	4.4
1943	6	22	9	27	34.13	32.845	130.725	3	4.2
1943	6	24	19	27	16.99	33.797	130.578	0	3.8
1943	7	3	2	19	54.12	32.145	131.848	24	4.5
1943	7	7	17	13	1.58	31.619	129.169	0	5.1
1943	8	8	0	4	28.81	34.631	131.725	10	5
1943	8	9	4	27	55.87	34.551	131.896	8	4.9
1943	8	13	14	12	13.57	32.252	131.596	92	4.6
1943	9	3	21	48	43.51	32.023	131.787	29	4
1943	9	4	1	20	46.44	34.544	131.926	6	4.3
1943	9	13	0	54	39.37	31.608	131.652	34	4.8
1943	10	31	18	45	17.01	34.739	131.138	40	4.7
1943	11	1	12	28	57.31	31.347	130.154	128	4.1
1943	11	18	16	11	57.08	32.971	131.909	52	4.9
1943	11	18	14	58	20.69	31.25	129.42	25	4.8
1943	12	26	3	20	42.5	31.986	132.117	0	5
1943	12	27	16	48	50.32	32.148	131.891	0	4.7
1943	12	29	1	4	17.48	33.59	132.142	43	4.4
1944	1	5	11	53	43.68	31.706	131.975	35	5.4
1944	1	7	5	55	36.98	32.978	131.383	2	4.8
1944	1	7	13	34	25.77	31.521	131.553	0	4.5
1944	1	27	23	8	27.54	33.564	132.038	37	4
1944	2	16	11	23	3.81	33.026	131.181	6	3.9
1944	2	16	11	24	52.15	33.03	131.15	5	3.8
1944	3	13	4	15	37.06	33.072	131.119	0	4.4
1944	3	25	13	30	14.31	32.931	131.889	0	4.4
1944	4	7	3	29	52.03	31.789	131.469	54	4.5
1944	5	3	12	9	11.99	32.756	132.313	45	4.3
1944	6	7	19	15	1.83	33.264	131.84	65	5.7
1944	6	20	0	45	38.74	36.936	123.144	0	5
1944	6	30	16	36	13.56	33.533	131.89	85	4.3
1944	7	3	18	0	37.48	33.698	132.404	11	4.3
1944	7	9	12	46	48.98	32.498	130.596	0	4.3
1944	7	14	10	14	42.67	34.053	131.926	7	4.8
1944	7	23	0	2	30.59	33.532	132.401	46	4.2
1944	8	13	10	36	50.7	32.828	131.253	22	4.3
1944	8	21	9	27	46.21	32.394	131.7	50	4.4
1944	8	22	21	57	3.12	33.134	131.093	11	4.2
1944	8	31	15	43	29.27	32.016	131.143	85	4.8
1944	9	3	21	54	35.07	32.836	131.278	106	3.9
1944	9	19	0	26	11.67	33.2	131.165	24	3.8
1944	10	29	9	56	7.87	32.654	130.718	18	3.6
1944	12	19	23	8	52.96	38.833	124.075	25	6.5
1944	12	19	23	9	3	39.887	124.15	35	6.6
1945	1	6	15	13	54.07	33.53	132.356	13	4.5
1945	1	25	22	59	31.11	33.008	131.161	8	4.3
1945	2	12	10	51	32.22	33.515	131.406	102	4.3
1945	3	29	6	32	7.62	31.712	128.952	43	4.6
1945	4	14	13	22	35.04	31.479	131.975	5	5
1945	5	5	15	29	37.89	32.238	132.419	44	4.7
1945	6	2	21	4	24.62	33.495	131.336	124	4.2
1945	8	21	19	7	13.58	42.227	131.686	650	5.8
1945	12	10	12	42	11.86	31.224	129.094	3	5.3
1945	12	20	10	43	12.77	31.626	131.25	100	4
1946	2	11	6	9	16.7	31.218	131.663	18	5
1946	4	3	14	16	34.57	31.042	132.207	119	4.8
1946	4	8	12	23	52.64	33.177	131.196	12	4.8
1946	4	11	1	37	46.25	33.137	131.078	4	4.3
1946	4	22	10	13	39.8	33.224	131.154	12	3.8
1946	5	1	19	1	54.12	31.577	131.972	22	5.3
1946	5	1	19	12	47.27	31.441	131.91	27	5
1946	5	10	11	12	19.44	31.549	131.429	4	4.5
1946	5	25	20	41	50.14	31.007	132.091	72	5.3
1946	5	30	3	34	1.67	33.213	131.181	12	3.9
1946	6	1	0	0	41.62	32.383	131.475	64	4.1
1946	6	5	14	3	22.53	33.202	131.169	7	4.1
1946	6	6	19	13	26.09	33.196	131.08	0	4
1946	6	14	0	50	5.81	33.224	130.622	0	3.6
1946	6	17	8	17	25.38	32.422	129.844	0	4.3
1946	6	26	22	19	0.7	32.797	131.38	126	4.1
1946	7	23	20	7	15.48	33.256	130.914	1	3.8
1946	8	8	16	39	40.62	33.623	132.376	0	4.3
1946	8	20	18	42	41.08	33.352	132.316	42	5.6
1946	8	30	5	50	40.74	31.234	129.569	0	5.1
1946	9	6	4	44	35.39	33.712	132.365	11	4.4
1946	9	7	16	31	34.92	31.753	131.029	7	4.1
1946	9	10	18	43	23.79	33.537	131.467	0	4.4
1946	11	8	13	39	35.1	31.345	129.865	2	4.5
1946	12	21	5	44	8.46	32.776	130.303	7	4
1946	12	22	3	41	3.86	32.703	130.69	7	5
1946	12	22	11	22	1.44	32.773	130.59	12	4.3
1946	12	23	6	15	11.98	32.948	130.182	18	4.1
1946	12	25	6	15	33.81	32.502	132.435	4	4.5
1946	12	25	15	20	11.44	32.979	130.813	5	4.4
1946	12	25	19	5	23.22	32.789	130.949	24	4.2
1947	1	7	19	56	10.81	31.762	128.655	44	4.8
1947	1	10	13	58	28.57	34.826	130.494	0	4.8
1947	1	10	19	42	37.89	33.282	130.204	3	3.9
1947	1	13	10	53	42.95	32.905	130.832	2	4.5
1947	1	13	21	59	29.65	33.135	130.799	17	3.9
1947	1	14	11	53	21.37	32.941	130.651	0	4.1
1947	1	19	9	6	1.35	32.568	131.649	22	4.5
1947	3	5	22	14	21.1	32.706	131.94	0	4.5
1947	3	9	20	29	9.41	34.731	130.119	0	4.6
1947	3	19	17	36	20.98	32.01	129.815	9	4.3
1947	4	6	6	30	49.57	35.019	132.346	11	4.3
1947	4	9	3	13	52.56	31.88	128.935	14	4.5
1947	4	26	13	59	56.12	32.677	132.283	0	4.6
1947	5	3	4	16	59.97	31.302	131.603	0	4.4
1947	5	9	23	5	37.3	33.372	130.95	7	5.3
1947	5	11	6	53	4.38	33.359	130.986	6	5
1947	5	11	14	0	48.25	33.125	130.364	14	3.8
1947	5	14	19	57	50.27	33.411	131.037	12	3.8
1947	5	15	19	54	30.21	32.936	131.328	14	4.1
1947	5	20	16	44	4.01	33.286	130.725	0	4.1
1947	8	6	23	49	29.76	33.546	131.857	40	4.5
1947	8	12	8	43	17.86	33.431	132.336	24	4.7
1947	8	14	18	49	40.9	31.998	131.563	46	4.8
1947	8	15	18	12	0.57	31.323	129.033	31	4.5
1947	8	25	18	33	24.89	34.627	131.75	0	4.5
1947	9	18	2	46	48.83	32.413	132.413	30	4.5
1947	9	24	18	7	47.27	31.749	129.355	0	4.7
1947	9	24	8	44	2.78	33.309	129.06	43	4.2
1947	10	8	3	36	46.7	31.244	131.867	3	5
1947	10	11	2	30	59.19	31.029	131.634	55	5.3
1947	10	11	2	51	28.2	31.14	131.657	16	5.3
1947	11	26	20	12	42.6	31.931	131.869	18	4.7
1947	11	27	12	46	50.96	31.722	131.743	0	4.2
1947	11	27	12	31	47.85	32.583	129.909	3	4.5
1947	11	28	18	42	27.72	31.03	131.16	46	4.6
1947	12	25	10	2	25.57	33.67	131.466	81	4.1
1947	12	29	16	17	6.78	31.275	130.837	139	4.8
1948	1	1	8	5	48.91	31.292	131.551	0	4.8
1948	1	7	11	45	55.85	33.598	131.666	79	4.3
1948	1	10	10	58	35.73	32.787	130.566	10	3.8
1948	1	22	4	22	57.72	31.027	130.417	155	4.8
1948	2	6	3	53	12.93	31.259	130.528	9	4.3
1948	2	15	9	19	34.68	32.69	130.886	19	4.6
1948	3	8	4	53	46.29	31.614	131.878	0	4.4
1948	3	24	13	4	33.87	32.856	130.601	2	4.3
1948	4	21	10	52	35.55	32.161	132.08	28	4.6
1948	4	22	13	22	1.37	31.436	131.604	53	4.8
1948	4	28	22	18	19.74	32.742	132.262	4	4
1948	5	1	21	35	51.7	31.124	132.321	14	4.8
1948	5	9	11	9	7	31.552	131.63	25	6.8
1948	5	11	12	48	19.45	32.059	132	0	4.3
1948	5	11	21	0	38.72	32.13	130.95	90	4.9
1948	6	21	2	15	8.02	32.777	130.858	16	4.2
1948	6	21	4	18	33.28	32.803	130.93	19	4.1
1948	6	29	19	14	34.22	33.796	131.178	12	4.3
1948	7	7	0	27	44.49	32.02	132.321	13	4.5
1948	7	15	4	32	25.72	35.269	131.906	1	4.4
1948	7	15	5	58	17.12	33.34	130.9	5	4.1
1948	7	15	17	42	6.22	32.113	132.075	0	4.4
1948	8	2	10	14	33.85	33.207	129.586	5	4.3
1948	8	4	7	45	51.8	32.828	131.715	24	4
1948	8	17	8	23	10.76	31.921	132.081	0	4.7
1948	8	30	20	52	43.05	31.612	131.751	17	4.7
1948	9	11	17	33	41.98	33.494	132.1	0	4
1948	9	27	14	47	17.65	32.548	130.542	16	4.2
1948	10	5	11	35	53.72	31.886	131.447	42	4.3
1948	10	13	6	47	55.88	35.271	130.801	0	4.1
1948	10	15	0	59	9.11	33.084	131.48	99	4.9
1948	10	27	4	52	25.05	31.159	131.388	19	5.1
1948	11	2	13	35	48.24	31.866	130.442	0	3.9
1948	11	4	1	0	40.22	32.27	131.755	40	4.3
1948	11	23	21	45	34.5	33.239	131.988	81	3.9
1948	11	29	15	34	42.99	31.245	130.528	123	4.1
1948	12	12	16	24	21.08	31.982	132.288	23	4.4
1949	1	7	19	40	13.12	32.642	130.806	14	4.1
1949	1	12	18	57	25.2	32.523	130.646	0	4.5
1949	1	15	1	3	29.5	32.918	130.703	0	4.2
1949	3	20	3	19	27.2	31.276	130.68	165	5.6
1949	4	3	0	33	59.52	31.499	131.461	56	4.4
1949	4	5	18	27	8	41.643	131.34	574	6.7
1949	4	13	5	22	21.85	32.135	132.226	0	4.5
1949	4	13	7	50	58.58	32.221	132.171	4	4.1
1949	4	20	3	5	8.1	31.865	131.657	0	3.9
1949	4	29	21	28	39.36	31.783	131.947	15	5
1949	6	8	9	49	41.17	31.385	130.099	168	4.5
1949	6	12	17	4	7.99	31.555	131.952	6	4.1
1949	6	27	14	19	46.75	32.317	130.312	29	4.5
1949	8	2	11	23	15.51	31.834	132.082	12	4.6
1949	8	10	12	31	32.41	31.092	131.511	9	4.6
1949	8	23	4	1	12.66	32.52	130.661	0	4.8
1949	8	26	20	0	14.39	32.285	131.553	7	4
1949	10	3	10	43	40.76	33.86	132.465	46	4
1949	10	5	2	52	57.81	33.025	132.015	44	4.7
1949	11	6	13	0	4.06	31.606	131.979	8	4.8
1949	11	16	10	10	11.38	31.269	131.831	4	4.7
1949	11	19	13	2	40.72	33.551	132.282	33	4.5
1950	1	23	20	14	55.49	35.474	131.248	8	4.7
1950	2	8	2	2	3.44	31.157	130.204	138	4.8
1950	2	21	4	27	51.18	31.973	131.971	0	4.1
1950	3	31	15	0	18.86	33.614	132.077	14	4.2
1950	3	31	20	14	15.73	32.768	130.87	0	4.1
1950	4	28	5	15	22.2	33.839	132.079	44	4.4
1950	4	29	20	29	46.26	33.502	132.075	6	4.1
1950	5	7	3	17	27.75	31.384	130.676	164	4.3
1950	5	17	20	46	51	39.31	130.66	579	6.7
1950	5	27	11	50	44.54	33.544	132.07	15	4.2
1950	6	1	1	30	12.79	33.183	130.611	14	4.3
1950	6	3	6	4	23.14	33.86	132.249	21	3.9
1950	6	12	22	27	3.25	32.091	130.981	1	4.5
1950	6	25	16	37	56.73	32.843	130.655	16	4.2
1950	7	4	10	54	19.15	32.89	132.275	0	3.8
1950	7	12	1	49	59.57	32.232	132.283	12	4.3
1950	7	23	14	29	35.42	35.054	131.126	0	4.4
1950	7	23	17	28	27.02	31.248	131.978	19	5
1950	7	29	5	49	55.73	34.146	129.924	0	4.1
1950	8	30	4	47	24.9	33.745	132.348	4	3.9
1950	9	16	21	48	41.55	32.831	131.393	133	5.3
1950	9	24	1	0	15.91	31.803	129.12	14	4.8
1950	10	1	8	54	25.28	33.386	131.976	58	4.1
1950	10	28	3	31	18.41	32.509	132.199	4	4.3
1950	12	24	14	10	12.29	32.04	131.724	27	5.2
1950	12	24	14	16	10.55	32.003	131.899	0	4.9
1950	12	24	18	16	17.81	31.809	132.023	17	4.9
1950	12	30	1	22	1.51	32.888	131.631	52	4.5
1951	1	1	13	16	23.32	32.033	131.941	5	4.3
1951	1	6	7	33	10.79	32.01	131.273	8	4
1951	1	11	9	18	18.73	31.676	131.517	36	4.8
1951	1	16	22	53	40.11	33.923	129.431	14	4.1
1951	1	17	5	22	36.68	31.867	131.878	27	4.8
1951	2	6	18	12	23.64	31.653	131.692	27	4.5
1951	2	7	4	45	12.66	32.322	129.874	18	4.3
1951	2	15	16	11	24.19	32.719	130.168	12	5.1
1951	2	19	3	22	7.69	32.086	132.033	8	4.5
1951	2	19	13	48	30.56	32.715	130.105	8	4.2
1951	2	24	19	41	37.24	33.648	132.031	53	3.9
1951	3	7	0	15	48.78	31.019	129.321	0	4.6
1951	3	7	0	19	35.31	32.395	129.77	25	4.3
1951	3	24	9	59	59.99	33.473	132.178	50	3.9
1951	3	27	11	19	30.49	32.527	130.533	0	4
1951	4	26	3	30	1.65	31.205	130.36	154	5.2
1951	5	15	9	41	57.89	32.285	128.627	30	4.4
1951	6	19	3	16	8.71	32.672	130.103	1	3.9
1951	6	20	17	38	10.42	33.383	131.487	103	4.2
1951	7	2	23	56	24.56	32.31	132.383	2	4.2
1951	7	31	4	28	46.37	31.626	131.665	1	4
1951	8	18	0	30	8.22	33.538	132.368	26	4.2
1951	8	27	12	33	36.86	32.556	130.268	14	4.2
1951	9	19	9	38	7.62	32.866	130.746	1	3.9
1951	10	9	10	51	5.24	33.09	130.794	25	3.8
1951	11	8	16	1	39.45	33.013	132.425	29	4.1
1951	12	10	14	19	14.57	31.332	131.738	79	4
1951	12	11	18	10	57.35	31.811	131.952	31	4.3
1951	12	19	20	0	17.21	32.142	131.748	0	4.2
1952	1	30	20	44	18.18	31.068	131.913	73	4.5
1952	2	7	15	28	53.4	32.527	131.981	7	4.6
1952	2	8	3	23	55.15	32.696	129.863	3	3.4
1952	2	14	4	26	24.92	31.637	131.472	0	3.8
1952	3	19	18	4	51.4	39.436	128.619	0	6
1952	3	19	18	4	18	38.872	125.83	35	6.3
1952	4	14	13	42	14.58	32.539	131.533	160	4.3
1952	4	24	0	56	41	38.596	125.59	30	5.6
1952	5	6	14	44	59.5	31.127	130.55	170	4.8
1952	5	16	12	37	0.42	32.829	130.859	20	3.7
1952	6	3	18	6	59.61	31.075	130.131	147	4.5
1952	6	13	9	47	29.25	33.247	132.016	38	4
1952	6	17	10	44	8.9	32.599	131.165	133	4.3
1952	6	22	7	43	34.26	33.595	132.122	56	4.1
1952	7	4	6	26	42.92	32.333	131.962	23	4.1
1952	7	26	22	32	51.69	31.048	130.145	163	5.1
1952	7	27	10	17	51.83	31.331	130.774	145	4.5
1952	8	5	20	6	11.01	31.337	131.932	20	4.9
1952	8	9	14	20	3.21	33.507	131.874	72	4.4
1952	8	20	15	38	2.48	32.033	132.152	4	4.8
1952	9	8	20	46	13.44	33.595	132.413	14	3.9
1952	9	12	22	0	46.22	32.648	128.991	10	4.3
1952	9	22	21	32	38.26	31.098	131.47	0	4.8
1952	10	25	18	7	30.78	33.905	131.903	4	4
1952	12	31	2	34	24.95	31.754	132.082	73	4.5
1953	1	8	12	35	13.44	31.586	132.066	4	4.8
1953	1	18	5	47	36.04	31.918	132.107	32	5
1953	1	23	11	47	57.35	33.186	132.129	62	5.2
1953	2	2	16	24	47.01	32.786	130.479	0	3.4
1953	2	15	7	31	55.24	33.656	131.783	109	4.3
1953	2	23	19	18	31.67	31.717	131.757	22	4.9
1953	4	13	13	48	25.99	31.221	131.707	28	4.8
1953	4	19	3	52	20.3	33.892	132.391	54	4.3
1953	5	1	12	10	48.01	31.064	131.328	0	4.9
1953	5	24	19	51	37.22	32.957	130.86	4	4.1
1953	6	8	10	14	49.2	32.322	132.358	0	4.3
1953	7	18	3	29	38.97	32.826	130.863	8	4.2
1953	7	22	21	29	35.3	33.028	131.458	119	4.5
1953	8	9	3	51	27.35	32.722	131.344	116	4.5
1953	10	28	11	8	34.27	31.689	129.218	5	5.3
1953	10	28	11	20	5.64	31.564	129.23	14	5.3
1953	10	31	0	6	0.12	31.792	129.193	0	5.2
1953	11	4	15	5	15.81	39.294	129.7	598	6
1953	11	14	11	23	24.2	31.232	131.072	77	4.5
1953	11	27	4	25	54.55	31.894	131.949	18	5
1953	12	29	1	4	19.43	34.529	132.375	11	4.3
1954	2	24	2	32	41.57	32.003	130.953	0	4.3
1954	2	24	3	28	19.72	31.95	130.942	21	5
1954	3	6	0	17	53.48	31.198	131.388	38	4.7
1954	3	23	14	25	42.96	32.582	132.086	25	4.9
1954	4	20	10	17	53.52	31.133	131.336	18	4.5
1954	5	27	15	50	13.84	31.688	131.765	19	5.2
1954	7	12	4	51	45.5	32.626	131.177	154	4.6
1954	7	21	17	7	18.75	33.695	132.398	46	4.5
1954	10	8	16	51	20.83	31.139	130.621	148	4.7
1954	10	20	2	29	18.7	31.211	129.933	8	4.8
1954	10	20	19	22	16.44	32.879	131.99	52	4.3
1954	10	30	13	34	7.14	33.684	132.318	36	4.1
1954	11	19	14	56	2	40.776	132.05	552	6.3
1955	2	6	12	55	3.39	32.725	130.146	0	3.6
1955	3	7	6	59	35.69	33.317	132.112	56	4.1
1955	4	17	10	13	32.63	33.302	130.097	0	4.6
1955	4	23	15	7	30.63	32.282	131.93	39	4.3
1955	5	29	14	36	27.19	31.771	131.582	26	4.5
1955	5	31	23	19	12.11	32.548	129.87	9	4
1955	10	11	5	35	38.85	31.632	131.78	19	5.2
1955	10	15	13	45	28.04	32.833	130.617	0	3
1955	10	15	14	12	51.33	32.8	130.601	2	4.6
1955	11	22	21	10	3.62	32.84	131.884	51	4.6
1956	1	1	1	59	14.92	32.618	131.981	45	4.5
1956	1	30	14	45	6.48	33.678	132.324	53	4.9
1956	3	5	15	43	48.49	33.58	132.273	32	4.1
1956	3	28	11	41	10.58	32.573	130.735	8	4
1956	3	28	23	20	22.11	32.861	130.77	10	3.9
1956	4	10	22	8	13.43	32.044	131.279	60	4.1
1956	6	8	3	19	16.28	31.818	131.774	22	5
1956	7	1	10	48	28.92	32.496	132.453	18	4.6
1956	8	10	5	35	0.1	32.62	132.19	0	5
1956	8	23	5	12	10.13	32.61	132.274	12	4.7
1956	9	7	7	45	29.64	31.028	131.966	53	5
1956	10	5	19	34	12.83	33.156	131.62	97	4.5
1956	10	12	21	46	38.6	32.618	130.014	9	3.9
1956	10	13	6	37	26.61	32.862	130.483	0	3.7
1956	10	16	3	59	28.39	32.799	130.483	0	3.8
1956	10	24	10	1	30.28	32.092	132.064	6	4.7
1956	11	2	20	34	22.81	33.72	132.372	46	4.4
1956	11	20	19	32	26.98	31.471	132.325	56	4.8
1957	1	9	6	14	29.55	32.738	130.486	2	3.8
1957	3	19	11	55	1.38	31.959	132.089	7	4.8
1957	4	28	20	5	30.04	32.925	130.347	12	4
1957	5	30	15	25	44.57	32.579	130.908	19	4.7
1957	6	25	9	34	17.68	31.744	131.642	43	4.7
1957	7	9	23	45	40.85	33.163	131.522	100	4.4
1957	11	4	22	10	50.33	33.508	132.34	47	4.3
1957	11	11	20	25	12.9	32.672	131.997	40	4.5
1957	12	25	10	48	17.01	32.6	129.993	2	3.9
1958	1	7	11	38	35.95	34.537	131.762	11	4.6
1958	2	8	6	37	13.98	31.492	132.074	25	5
1958	2	27	10	13	44.3	33.036	130.432	19	3.8
1958	3	14	15	18	57.06	32.708	130.826	15	4.5
1958	3	30	20	12	37.35	32.842	130.578	9	3.6
1958	5	15	5	32	7.94	32.858	132.265	35	4.7
1958	5	26	2	40	51	31.39	129.77	15	5.6
1958	6	7	23	47	7.17	33.266	130.184	14	3.9
1958	6	15	5	22	28.37	31.703	132.049	15	4.3
1958	6	19	22	49	51	32.95	130.352	19	4.8
1958	6	21	4	17	10.07	31.341	129.594	9	5.3
1958	6	25	3	36	39.34	31.279	131.544	0	4.6
1958	7	13	17	7	49.33	33.813	132.392	54	4.3
1958	9	5	1	2	36.06	31.724	131.714	27	4.8
1958	9	8	23	53	19	33.771	131.83	80	5.5
1958	9	11	4	3	17.14	32.772	130.125	3	4.3
1958	9	15	4	42	13.51	31.741	131.987	28	5.5
1958	11	7	3	53	23.07	32.859	130.145	8	3.6
1958	12	19	1	24	35.61	32.721	130.107	7	3.6
1958	12	21	4	32	52.71	31.011	131.517	10	4.8
1958	12	30	19	48	2.63	32.802	130.805	0	4.1
1959	1	24	3	31	31.97	33.695	132.283	53	4.3
1959	2	1	6	22	3.68	31.381	130.494	166	4.8
1959	4	15	7	10	55.29	31.801	129.388	13	5
1959	4	28	17	18	5.7	31.751	129.425	11	5
1959	6	2	9	47	22	31.539	131.85	35	5.8
1959	6	4	15	37	6.16	31.277	131.188	66	4.2
1959	7	1	12	29	46.7	31.064	131.512	38	4.3
1959	7	7	17	21	53.93	32.991	130.342	4	4.2
1959	9	9	1	5	36.65	31.501	131.864	28	5
1959	9	19	5	11	59.42	32.892	130.837	9	4.4
1959	9	19	20	20	33.05	32.543	129.945	21	3.4
1959	10	3	5	50	18.57	31.745	129.364	0	5.3
1959	10	29	23	30	27	42.725	131.16	562	5.9
1959	12	7	17	13	7.79	33.804	132.427	59	4.1
1960	1	19	12	10	54.01	31.959	131.548	31	4.2
1960	2	5	17	43	35.9	31.804	132.047	24	5.3
1960	3	4	12	53	11	31.173	130.48	132	6.3
1960	5	2	2	57	50.05	33.193	130.534	14	4.3
1960	5	11	8	17	59	33.9	131.82	93	4.5
1960	7	2	21	44	22.11	41.282	132.285	569	5.3
1960	7	30	0	47	22.24	33.008	130.366	8	4.1
1960	9	4	10	13	27.61	32.054	132.042	13	5
1960	9	26	20	36	23	32.5	131.9	0	5.3
1960	10	8	14	53	7	40.09	129.89	608	6.3
1960	10	9	22	7	25.29	40.397	130.016	598	4.8
1960	10	13	21	55	17.25	33.578	132.334	32	4.3
1960	10	15	0	26	18.09	31.091	131.532	15	4.9
1960	11	7	22	23	11.12	32.333	132.15	35	5.3
1960	12	31	4	9	21.48	31.84	131.701	31	4.6
1961	2	20	23	44	1.85	32.973	130.36	18	4.3
1961	2	27	3	10	52	31.739	131.48	35	7.5
1961	3	1	23	54	5.55	31.603	131.483	29	4.5
1961	3	16	7	16	3.47	32.018	130.69	0	5.1
1961	3	18	15	22	4.27	31.99	130.77	4	5
1961	3	18	17	57	5.52	31.973	130.797	4	4.5
1961	3	30	2	24	2.88	32.935	131.903	54	4.3
1961	5	3	11	32	3.81	33.082	130.488	4	4.1
1961	6	7	3	55	3.44	33.115	130.488	2	3.8
1961	7	10	21	38	2.73	33.1	130.473	0	4
1961	8	1	19	30	2.45	32.975	131.443	122	4.7
1961	8	11	13	27	15	31.67	132.12	0	5
1961	8	11	15	8	1.63	31.858	132.153	37	5.3
1961	8	15	7	5	5	31.59	131.63	35	5.8
1961	8	26	21	28	1.36	32.643	130.033	9	3.6
1961	9	19	15	15	5.72	32.68	130.07	4	3.4
1961	10	11	7	40	4.17	33.022	130.505	8	4
1961	10	13	18	53	0.31	33.457	132.128	71	4.3
1961	10	15	0	8	9	35.03	131.48	40	4.6
1961	11	9	20	20	4.4	33.11	131.117	4	3.9
1961	11	27	14	57	16	31.381	131.46	65	6.2
1961	12	11	13	57	5.34	32.805	130.747	3	4.1
1962	3	13	0	21	0.76	32.907	130.712	0	3.8
1962	3	29	12	38	1.03	32.867	130.822	3	4.3
1962	3	30	2	0	5.3	32.825	130.833	4	3.6
1962	4	13	15	41	3.69	32.993	130.358	7	4.3
1962	4	15	19	12	2.41	32.783	130.863	10	3
1962	4	23	4	15	31	32.16	130.45	171	5.5
1962	4	25	4	9	4.89	32.865	130.723	4	4.1
1962	5	18	23	20	5.79	31.338	131.327	50	4.8
1962	6	28	13	13	5.67	31.2	131.245	58	5
1962	7	25	17	6	3.99	31.93	131.102	0	4.1
1962	7	25	18	18	0.14	32.103	132	0	4.8
1962	7	31	14	9	1.8	32.443	132.45	30	5.2
1962	7	31	14	9	26	32.4	131.64	89	4.9
1962	7	31	14	33	0.98	32.23	132.467	3	4.5
1962	7	31	17	8	48	32.5	132.1	0	4.9
1962	9	24	19	21	3.4	32.92	131.958	47	4.4
1962	9	25	11	37	1.61	33.892	131.77	2	4.8
1962	10	10	16	50	1.72	31.09	131.937	19	4.8
1962	10	15	0	8	5.61	31.683	132.183	16	5.3
1962	10	15	0	9	2	31.637	131.59	30	5.9
1962	11	7	0	38	0.75	31.17	131.513	38	4.5
1962	12	4	17	16	4	36.1	123.5	33	4.2
1962	12	19	2	42	4.56	32.957	130.623	1	3.8
1962	12	28	13	0	3.87	31.808	131.147	0	4.7
1962	12	28	16	14	3.83	31.495	131.635	42	4.2
1963	1	9	0	46	4.56	31.188	130.443	159	5.3
1963	1	9	0	46	46	31.27	130.19	177	5.3
1963	1	27	12	52	4.65	34.857	132.072	30	2.6
1963	2	16	23	54	1.5	32.88	131.987	0	4.1
1963	3	13	18	9	0.47	33.427	132.407	56	4.3
1963	3	16	23	32	3.98	31.135	131.432	63	4.9
1963	3	29	17	59	5.76	31.81	129.51	0	4.8
1963	3	31	21	26	5	35.13	132.4	0	5
1963	4	1	0	2	18	35.1	132.43	0	4.9
1963	7	20	10	4	2.42	32.67	129.75	4	4.6
1963	8	28	18	22	0.35	32.835	130.76	9	3.8
1963	9	7	10	16	58	36.383	130.54	27	6.1
1963	9	10	3	10	5.03	32.353	129.87	8	4
1963	9	19	8	23	5.27	32.833	130.838	8	4.5
1963	9	20	3	21	1.42	32.803	130.848	7	3.7
1963	9	21	6	31	2.89	32.818	130.875	2	3.6
1963	10	4	8	24	37	32.052	131.73	35	6.6
1963	10	5	16	34	0.56	32.192	131.98	0	5
1963	10	19	23	27	5.04	32.098	131.992	23	4.6
1963	11	19	13	37	5.82	39.54	129.707	587	4.9
1963	11	21	1	57	1.09	31.19	132.207	62	5
1963	11	30	8	26	5.71	32.887	132.245	69	4.4
1963	12	9	4	23	5.64	32.982	130.788	10	4.3
1963	12	9	8	53	1.85	32.748	130.89	44	3.9
1963	12	10	9	56	0.9	32.087	131.893	0	4.8
1963	12	11	18	22	3.22	31.33	130.455	158	4.6
1963	12	16	16	59	4.74	31.903	131.898	50	4.8
1963	12	20	21	55	1.21	31.135	131.205	77	4.8
1964	1	2	20	36	16.44	33.038	130.407	26	4.1
1964	1	5	18	18	15.3	32.59	132.283	30	4.2
1964	1	25	2	17	49	38.676	129.58	573	5.5
1964	3	3	22	38	19.33	32.839	130.859	4	3.6
1964	3	12	3	23	20	31.96	132.4	21	5
1964	4	12	21	14	54	33.495	132.06	68	4.9
1964	4	29	11	11	36	32.147	129.1	13	5.1
1964	6	24	21	56	22	32.203	129.15	7	4.9
1964	6	29	16	33	5.48	32.207	129.102	4	4.3
1964	7	4	5	9	5.61	32.158	128.932	8	4.3
1964	7	10	19	50	46.26	33.366	132.242	61	4.4
1964	10	2	10	24	42	31.309	130.57	155	4.6
1964	10	11	18	18	30.43	31.935	130.275	4	4.6
1964	10	17	15	34	50	42.414	130.89	500	4.6
1964	10	27	11	8	3.48	32.567	132.307	2	4.3
1964	11	1	3	43	57.49	32.247	131.96	0	4.5
1964	11	8	20	42	23.47	32.07	131.629	32	4.5
1964	11	14	12	56	7	33.468	132.08	70	5.8
1964	12	2	3	38	3.85	33.022	130.373	9	4.1
1964	12	12	1	4	5.79	38.97	130.225	565	5.2
1964	12	12	1	5	0	38.845	130.31	556	5.5
1965	1	3	13	26	46	31.5	129.8	20	4.5
1965	1	5	4	40	2.58	31.025	129.893	77	4.5
1965	1	6	23	14	20.83	32.084	131.23	0	3.9
1965	1	27	21	22	34	33.7	132.2	40	4.2
1965	1	28	19	42	34.68	32.926	130.798	8	3.8
1965	2	7	0	7	0	33.1	130.4	0	4.2
1965	2	7	1	12	40.16	31.495	131.992	28	4.1
1965	2	10	10	24	21	33.7	132.3	40	4.2
1965	2	11	13	31	28.99	32.9	130.414	0	3.8
1965	2	19	13	34	3	31.725	131.76	31	4.5
1965	2	24	16	52	49.33	31.722	132.068	10	4.4
1965	2	24	21	9	45.34	33.729	132.288	15	3.9
1965	2	27	5	29	17.32	31.934	131.079	0	4.1
1965	3	4	12	36	35.64	31.261	131.604	0	4.3
1965	3	24	12	51	45	33.2	130	40	4.3
1965	3	28	17	41	9	31.667	131.69	24	5
1965	4	6	2	4	58.9	31.65	131.973	32	4.5
1965	4	21	20	30	43.54	31.495	132.144	53	4.5
1965	4	22	7	20	30.25	32.109	129.442	0	4.1
1965	4	26	12	7	22	32.8	130.7	20	4.1
1965	4	28	20	26	22	32.2	128.7	0	4.4
1965	4	28	21	11	26.61	32.298	129.832	0	4.3
1965	5	2	23	13	6	31.564	131.8	27	4.6
1965	5	19	3	4	44.46	31.512	131.6	26	4.1
1965	5	30	8	40	46.71	31.671	131.57	21	4.3
1965	6	4	21	3	33.51	33.104	130.488	22	3.9
1965	6	12	15	19	22	41.849	131.45	500	4.7
1965	6	14	3	22	13.64	32.879	130.557	8	3.8
1965	7	5	3	19	59	32	132.1	0	4.5
1965	7	11	11	30	0	32.421	131.617	40	4
1965	7	12	7	48	39.38	32.413	130.877	1	3.9
1965	7	13	3	50	59	33.927	132.21	57	4.9
1965	7	13	23	3	42	33	130.4	20	4.1
1965	7	16	16	56	22	33.2	131.9	40	4
1965	7	19	3	50	0	31.593	132.088	40	4.2
1965	7	27	5	32	0.6	31.001	131.567	0	4.3
1965	8	2	3	18	35.88	32.269	131.307	73	3.9
1965	8	7	3	15	12	41.32	131.37	568	5.3
1965	8	7	16	3	43.48	32.299	132.073	3	4
1965	8	24	14	39	31.74	33.004	130.344	16	3.7
1965	8	28	0	14	11	33.1	130.4	20	4
1965	8	28	11	24	22.35	31.237	130.627	162	4.3
1965	9	6	17	21	45.29	31.042	131.568	18	4.4
1965	9	22	21	49	47	31.984	131.77	30	5.5
1965	9	25	0	10	44	32.1	129.4	20	4.7
1965	10	9	7	53	19.94	32.664	130.999	6	3.6
1965	10	10	5	11	0.06	33.024	130.514	2	3.6
1965	10	16	0	32	1.69	31.414	131.572	38	4.3
1965	10	16	18	9	40	33.1	130.4	20	4.2
1965	10	16	19	21	0.79	33.102	130.472	28	3.8
1965	10	18	10	24	8.09	33.015	130.494	14	3.6
1965	10	21	15	51	51.53	33.224	132.43	43	3.8
1965	11	4	5	31	53.45	31.917	132.049	0	4.2
1965	11	4	13	34	43.81	31.282	128.861	23	4.5
1965	11	5	14	31	41.87	33.842	132.386	53	3.8
1965	11	7	17	29	28.82	32.428	131.798	16	3.9
1965	11	14	9	3	35	33.017	130.93	3	4.7
1965	11	26	10	17	33	32.9	130.8	0	4.4
1965	11	28	0	6	58.65	31.607	131.707	41	4.1
1965	11	30	8	40	46.14	33.079	130.214	22	3.9
1965	12	8	14	25	12	32.582	130.58	9	4.8
1965	12	14	7	2	14.36	31.51	131.806	3	3.9
1965	12	17	0	49	28.92	31.367	131.754	60	4.1
1965	12	18	21	25	26.1	34.566	131.87	3	4.3
1965	12	24	5	41	58.23	33.046	130.216	26	4
1965	12	24	10	19	25.21	33.084	130.184	19	3.8
1966	1	1	18	58	28	31.036	131.4	32	4.6
1966	1	15	3	8	31.54	32.952	129.932	25	3.9
1966	1	17	7	13	5.43	31.958	131.908	43	3.9
1966	1	21	0	21	13	31.972	131.67	33	5.1
1966	1	24	17	27	4.1	33.048	130.347	0	3.7
1966	2	6	17	53	16.96	35.298	131.997	0	4.2
1966	2	22	11	8	58.67	31.162	130.516	0	4.1
1966	2	22	11	38	45	31.344	130.07	10	5.1
1966	2	24	0	53	51.3	33.192	130.596	24	3.9
1966	2	24	8	10	8.89	32.572	131.58	60	4.4
1966	2	28	3	22	54.84	32.991	130.312	3	3.8
1966	2	28	16	39	46	31.163	130.42	150	5.1
1966	3	14	5	46	5.67	32.988	130.493	11	3.6
1966	4	10	0	24	54.47	32.682	131.807	36	3.9
1966	4	26	3	17	35	33	130.2	20	4.4
1966	4	29	1	22	44	32.992	131.99	56	4.2
1966	5	7	7	41	3.87	32.73	131.154	154	4.3
1966	5	9	17	46	7.16	33.189	130.571	0	3.8
1966	5	27	14	39	1	32.2	131.3	0	4.3
1966	5	28	6	35	29.19	32.467	132.229	23	4.2
1966	5	31	8	24	13.41	33.197	130.009	8	3.8
1966	6	5	16	4	14.08	33.57	131.708	99	4.1
1966	6	11	20	34	31	32.926	130.68	11	4.1
1966	6	12	5	24	20.83	31.988	131.785	30	4.1
1966	6	12	7	43	56.67	32.03	131.825	20	4.3
1966	6	23	5	15	38.82	33.815	131.883	73	3.9
1966	7	6	3	32	4	32.937	130.12	12	3.9
1966	7	10	13	11	59.9	32.598	131.75	24	3.9
1966	7	12	1	15	7.79	33.035	130.314	21	3.8
1966	7	16	0	51	32.99	32.796	130.231	12	3.9
1966	7	16	1	39	48.7	32.754	130.212	16	3.9
1966	7	17	2	55	3.37	32.75	129.964	8	4
1966	8	1	8	2	14	33	130.2	0	4.1
1966	8	2	19	48	15.52	32.565	130.667	12	3.8
1966	8	4	4	1	25	31.254	131.72	28	4.8
1966	8	5	18	32	21	31.219	130.16	10	4.5
1966	8	12	2	9	23.57	31.161	131.259	25	4.5
1966	8	18	15	49	41	32.9	130.1	0	4.3
1966	8	20	23	51	16.16	32.977	130.422	20	3.6
1966	8	25	9	32	50	32.181	132.28	24	4.6
1966	8	29	9	53	0.82	33.066	130.385	10	3.6
1966	9	25	3	22	30	32.485	131.478	0	3.9
1966	10	15	5	13	8.79	33.089	130.481	0	3.8
1966	11	1	20	32	13	31.476	131.67	33	4.8
1966	11	2	9	21	56	31.108	131.25	52	5
1966	11	5	15	43	4.53	33.307	132.169	13	3.9
1966	11	7	3	32	3.57	33.178	130.469	0	3.9
1966	11	12	21	1	44	33.033	130.25	14	5.4
1966	11	16	11	31	28.83	33.122	130.416	0	3.8
1966	11	23	5	57	8.96	32.61	131.676	0	3.9
1966	12	5	16	23	5	32.208	131.78	24	4.9
1966	12	22	1	51	36.06	33.024	130.373	0	3.6
1966	12	29	20	42	17	32.11	132.4	26	4.4
1966	12	30	19	40	19.77	32.255	132.223	72	4.2
1967	1	15	9	46	27.63	33.057	130.316	22	3.8
1967	1	19	12	59	57.28	32.704	132.132	32	4.1
1967	1	30	18	16	1.3	31.943	132.075	31	4.3
1967	2	1	20	3	42	33.3	132.3	40	4.2
1967	2	3	7	16	43	33.6	132.1	30	4.1
1967	2	4	1	22	52.84	32.593	132.199	26	3.9
1967	2	4	3	2	41.6	32.073	132.159	0	4.2
1967	2	4	4	6	10	32.082	132	51	4.4
1967	2	16	22	18	14.49	34.682	131.996	10	3.4
1967	2	17	16	12	53	32.799	130.84	12	4.1
1967	2	20	20	56	51	35.231	128.91	10	4.8
1967	2	20	14	26	36.08	31.591	132.039	0	4.1
1967	3	2	12	25	25.67	31.011	131.594	16	4.8
1967	3	21	1	13	51.42	31.201	130.753	172	4.1
1967	4	8	20	51	1.77	31.525	131.937	10	4.1
1967	4	12	5	7	14.91	33.354	130.9	7	3.7
1967	4	25	0	12	50	42.312	131.2	534	4.9
1967	4	28	4	37	46.19	33.128	130.514	3	3.9
1967	5	7	2	53	12.7	32.807	130.669	9	3.9
1967	5	10	23	39	11.27	33.195	130.463	14	3.6
1967	5	17	9	26	25.7	33.764	132.462	52	4
1967	5	25	5	8	23.51	32.916	130.723	0	3.9
1967	6	17	1	15	44.74	32.854	130.608	7	3.8
1967	6	19	21	43	24	32.799	130.56	12	4
1967	6	24	18	25	40	34.595	122.5	35	4.7
1967	7	3	5	34	38	31.216	130.28	182	5.4
1967	7	5	14	47	52.46	32.607	131.354	88	4.4
1967	7	7	8	15	58	32.571	131.13	157	5.2
1967	7	7	10	24	27.44	31.944	132.401	19	4.2
1967	7	8	6	11	40.55	32.345	130.393	6	3.9
1967	7	13	0	55	46	32.7	132.1	0	4.1
1967	7	13	1	4	21.26	32.89	130.626	0	3.6
1967	8	5	4	40	13.9	31.32	130.503	0	3.8
1967	8	5	5	13	58.08	31.427	130.548	0	3.8
1967	8	5	20	17	13.38	31.251	130.69	15	3.9
1967	8	8	2	35	48.29	31.23	130.567	0	3.8
1967	8	16	18	42	57.12	31.938	129.305	10	4.3
1967	8	21	15	27	4	31.454	131.74	33	4.6
1967	8	21	15	27	26.49	32.523	131.38	110	4.5
1967	8	23	2	33	34.29	33.004	130.295	3	3.7
1967	9	13	19	42	44.35	33.12	130.483	0	3.6
1967	10	1	19	10	17	33.09	130.34	18	3.8
1967	10	10	19	59	35.58	31.93	131.875	32	4.1
1967	10	26	6	14	22	33	130.3	20	3.8
1967	10	30	17	29	50.59	33.105	130.44	0	3.7
1967	10	31	5	48	47	32.9	132	0	4
1967	11	7	9	6	10	33.439	130.88	10	4.2
1967	11	16	5	52	0	32.277	129.75	6	4.7
1967	11	17	13	42	31	32.112	129.78	4	4.3
1967	11	18	22	39	6	32.5	132.1	0	4.3
1967	11	20	2	9	54.82	33.068	130.468	2	3.7
1967	11	28	11	36	56	32.151	130.84	129	5.7
1967	12	18	23	59	0	32.1	131.9	10	4.2
1967	12	19	3	12	25.27	33.135	130.458	0	3.8
1968	1	9	23	47	14	32.481	132.31	0	4.3
1968	1	31	8	24	28.39	32.327	131.121	108	4
1968	2	3	21	11	5.55	32.966	130.25	25	4.3
1968	2	12	16	32	2.34	33.553	132.116	69	4.1
1968	2	21	10	44	53	32.048	130.7	10	5.4
1968	2	22	6	23	10.47	31.201	130.642	165	4.3
1968	3	12	19	51	17.07	32.033	130.756	11	3.8
1968	3	19	13	19	10.16	32.044	130.821	0	4.3
1968	3	21	10	33	54.22	32.077	130.749	0	4.2
1968	3	25	1	21	1	32.022	130.73	0	5.1
1968	3	26	16	32	59.22	32.056	131.957	33	4.2
1968	3	28	17	58	4.2	32.016	130.811	18	4.1
1968	3	29	11	9	26.2	32.978	130.23	18	3.8
1968	3	30	0	32	7.46	32.026	130.768	24	3.9
1968	3	30	20	7	29.58	31.135	130.739	1	4
1968	4	1	9	42	5	32.499	132.31	26	6.4
1968	4	1	20	7	51.16	31.051	132.063	3	4.4
1968	4	3	11	8	29.4	32.154	131.995	0	4.3
1968	4	5	6	37	51.76	32.289	131.028	10	3.8
1968	4	5	7	49	52.11	32.432	132.075	12	4.1
1968	4	5	13	2	40.85	32.544	132.357	24	4.1
1968	4	6	3	49	8.92	32.162	131.888	27	3.9
1968	4	6	3	50	19.75	32.138	131.967	0	4
1968	4	6	17	1	21.96	32.046	132.33	4	4.1
1968	4	6	17	15	51.14	31.958	132.119	45	4.1
1968	4	11	15	46	31	42.328	131.19	552	5.2
1968	4	13	13	7	46.65	32.428	132.022	14	4
1968	4	15	11	17	2.01	32.014	130.777	16	4.1
1968	4	16	22	4	11.37	32.985	130.316	2	3.6
1968	4	17	14	53	55.71	32.668	132.373	0	3.9
1968	4	18	0	14	9.09	32.054	130.626	0	3.8
1968	4	20	5	3	35.83	32.066	130.865	4	4.1
1968	4	20	18	48	55.52	31.009	131.883	0	4.6
1968	5	1	20	56	43.08	32.145	130.842	10	3.9
1968	5	1	21	54	38	32.106	130.74	10	4.7
1968	5	3	7	51	12.63	32.013	130.783	0	4.1
1968	5	3	15	45	46.54	32.666	132.325	0	3.9
1968	5	4	7	44	48.99	32.724	130.773	12	4
1968	5	4	19	45	39.91	32.654	132.388	0	3.9
1968	5	12	17	14	39.25	33.404	132.006	78	4.1
1968	5	19	20	8	58.73	31.374	131.551	28	4.2
1968	5	19	21	5	29.15	31.244	132.004	25	4.8
1968	5	19	23	38	54.32	31.299	131.679	0	4.3
1968	5	21	23	30	31.07	32.544	132.451	21	3.9
1968	5	26	4	8	41.47	32.24	131.542	0	3.8
1968	5	28	13	6	39	32.353	132.46	30	4.9
1968	5	29	3	51	18.09	31.557	130.659	11	4.2
1968	5	30	20	41	55.62	32.094	130.834	0	4.3
1968	6	6	19	33	39.65	32.038	130.749	7	3.8
1968	6	15	13	21	23.65	31.64	130.631	0	4.1
1968	6	18	19	1	30.7	32.026	130.752	0	4.2
1968	7	5	12	50	23.63	32.039	130.817	0	4.3
1968	7	16	22	9	18	32.2	131.6	0	4.5
1968	7	30	11	41	13.92	32.097	130.851	0	3.8
1968	8	6	1	17	7	33.25	132.22	48	6.4
1968	8	10	15	57	34.5	32.739	130.038	0	4.1
1968	8	12	18	40	23.4	33.041	130.309	14	3.9
1968	8	13	20	22	13.98	32.066	130.689	0	4.4
1968	8	13	21	39	20.6	32.672	130.019	10	4.6
1968	8	14	22	16	16.47	32.676	130.03	6	4.2
1968	8	19	20	0	18.65	31.773	131.983	25	4.3
1968	8	20	14	41	43.84	31.687	131.988	10	4.5
1968	8	23	12	22	59.83	32.767	130.235	0	4.3
1968	8	23	22	5	54	33.328	132.36	46	5
1968	8	26	5	50	24	33.2	132.3	40	4.3
1968	9	5	16	39	44.1	31.133	130.359	168	4.3
1968	9	6	9	45	26.54	33.566	131.823	82	4.2
1968	9	7	4	22	49	31.035	131.88	31	6
1968	9	26	17	2	35	33.4	132.3	20	4.3
1968	9	28	19	48	43	32.316	132.18	26	4.6
1968	10	3	16	59	2.7	32.59	132.402	0	4.1
1968	10	5	2	40	9.98	32.236	131.209	85	3.8
1968	10	5	22	9	57.94	32.087	131.898	54	4.1
1968	10	21	12	37	55.26	33.996	131.873	6	4.1
1968	10	21	21	5	18.46	32.958	130.226	24	3.9
1968	10	24	18	16	47.68	31.273	131.863	26	4.6
1968	10	24	18	58	6.84	31.315	131.731	30	4.5
1968	10	27	22	15	49	33.772	132.34	42	4.5
1968	10	29	6	46	51.42	33.079	131.996	0	4.1
1968	10	30	3	58	44.93	32.428	131.047	127	3.9
1968	11	2	16	16	14.72	32.864	130.768	0	3.9
1968	11	3	11	32	31.2	32.995	130.254	13	3.8
1968	11	11	21	27	54.7	32.983	130.26	22	3.9
1968	11	14	21	11	56	31.616	131.72	34	5.4
1968	11	15	5	54	13	31.571	131.88	27	4.9
1968	11	19	1	19	42.36	32.287	131.673	40	4
1968	11	29	9	19	43.1	32.556	132.387	31	4.1
1968	12	7	13	18	15.8	33.37	132.123	59	3.9
1968	12	9	23	27	59.34	32.706	130.055	3	3.6
1968	12	13	8	54	19.6	32.963	130.226	28	3.8
1968	12	25	21	35	37.25	31.171	130.41	162	4.1
1969	1	1	9	18	22.53	32.337	132.126	0	4.2
1969	1	6	14	41	10.8	32.716	130.752	9	3.8
1969	1	8	12	28	1.92	31.47	132.263	36	4.6
1969	1	8	18	36	20.34	32.98	130.287	11	4.1
1969	1	18	2	54	31.34	31.524	131.376	39	4.1
1969	1	23	22	42	44	31.68	131.73	10	4.4
1969	1	23	23	51	52.35	31.763	131.987	0	4.1
1969	1	26	8	39	12.63	32.078	130.826	0	4.1
1969	1	28	16	10	17.81	33.783	132.451	46	3.7
1969	1	30	7	15	35	32.637	132.21	36	4.9
1969	2	5	15	9	17.26	33	130.278	10	4.2
1969	2	5	20	26	30.69	31.52	131.837	15	4.2
1969	2	8	15	28	23	31.502	129.04	11	4.9
1969	2	13	1	42	13.49	31.018	130.648	131	3.9
1969	2	14	21	42	9.79	32.684	130.079	5	4.3
1969	2	14	21	47	26.53	32.668	130.081	0	4.3
1969	2	16	3	58	41.88	31.671	132.069	18	4.3
1969	2	20	10	33	38.04	31.154	131.331	3	4.3
1969	2	28	6	5	48	33.596	132.04	66	4.9
1969	3	19	21	32	30.15	32.124	132.16	0	4.1
1969	3	22	22	14	3.01	32.982	130.29	13	3.9
1969	3	26	1	35	11.98	32.735	130.232	0	3.4
1969	3	26	3	58	4.12	32.551	132.343	10	3.8
1969	3	26	5	24	47	32.173	131.89	32	4.9
1969	4	10	23	54	6	42.055	131.17	563	5.5
1969	4	14	17	3	22.93	33.525	132.33	48	3.9
1969	4	17	19	18	50.44	31.574	131.934	25	4.4
1969	4	21	16	19	27	32.152	132	26	6.3
1969	5	2	2	1	7.75	32.887	130.727	13	3.9
1969	6	4	17	37	13.73	33.024	130.365	17	3.8
1969	6	20	12	9	35.2	32.124	131.783	0	4.3
1969	6	21	18	24	39.81	32.312	130.57	0	4.2
1969	6	27	0	46	36	42.309	131.06	550	4.9
1969	6	28	3	31	44.33	33.052	130.25	0	3.6
1969	7	2	11	45	27.4	32.592	132.057	24	4.3
1969	7	9	3	48	5.39	31.003	130.471	122	4.1
1969	7	24	15	30	55.04	32.087	132.063	0	4.2
1969	7	27	4	36	44	32.766	130.21	8	4.6
1969	7	27	4	47	39.69	32.745	130.194	8	3.9
1969	8	1	19	19	24.77	31.95	132.323	16	4.5
1969	8	12	10	19	28.43	33.365	131.734	80	3.9
1969	8	16	12	31	53.25	31.474	131.798	5	4.2
1969	8	24	9	9	26	31.801	132.21	37	4.7
1969	9	3	4	13	30.4	32.545	129.971	15	4.1
1969	9	4	7	9	26	32.966	131.44	109	5.2
1969	9	7	9	23	47	33.643	131.78	98	5.5
1969	9	7	11	40	42.4	33.024	130.409	16	3.8
1969	9	9	12	33	20	33.304	131.89	62	4.3
1969	9	11	11	19	20.66	33.338	130.408	12	3.9
1969	9	17	2	39	33	31.703	132.063	0	4.2
1969	9	18	3	40	51	31.075	131.55	28	6.3
1969	9	18	3	51	10	31.054	131.56	26	5.9
1969	9	21	7	29	37.86	31.083	130.356	140	4.1
1969	9	24	0	9	18.92	32.701	130.004	13	4.3
1969	9	24	8	36	28.67	32.029	132.205	0	4.1
1969	9	27	15	52	34.71	31.018	131.53	0	4.2
1969	9	29	23	54	47.73	31.381	129.627	3	4.3
1969	10	3	16	35	43.92	31.097	131.5	32	4.6
1969	10	3	16	35	46	31.735	131.26	33	4.9
1969	10	8	19	3	34.57	31.181	131.642	0	4.3
1969	10	17	19	39	10.66	31.1	130.277	165	4.1
1969	10	23	17	37	50.07	33.085	130.5	16	3.7
1969	10	29	20	3	36.64	33.016	130.491	8	3.8
1969	11	2	12	42	44.8	31.045	130.723	170	4.2
1969	11	13	2	5	21.08	32.919	130.318	15	3.8
1969	11	15	10	29	48.77	32.584	131.221	95	3.9
1969	11	16	19	56	3.52	33.076	130.478	6	3.6
1969	11	27	9	30	58.29	33.984	128.013	5	4.9
1969	11	30	1	43	17	33.271	132.36	45	5.3
1969	11	30	13	12	22	33.186	132.39	47	5.1
1969	12	4	20	24	11.18	33.098	130.479	23	3.9
1969	12	8	2	59	5.03	32.112	130.97	120	3.9
1969	12	12	0	0	23.92	32.733	129.969	8	4.1
1969	12	14	15	1	2.43	31.333	131.793	28	4.3
1969	12	16	3	8	3.63	32.736	129.906	12	4.2
1969	12	16	1	35	26.14	32.721	129.886	16	4.1
1969	12	17	7	59	0.97	32.743	130.183	8	3.9
1969	12	23	16	6	57.32	33.54	132.317	43	4.1
1969	12	27	7	28	16.74	32.721	130.795	8	3.9
1969	12	31	1	23	54.35	33.017	130.506	14	4
1970	1	1	15	18	14.82	32.231	131.843	30	4.1
1970	1	3	3	57	29.86	32.741	130.772	6	3.9
1970	1	18	12	21	23.22	32.96	130.275	1	4.3
1970	1	23	10	12	59.78	32.731	130.148	10	4.1
1970	2	3	16	22	33.34	32.078	132.266	6	4.5
1970	2	12	18	43	17.44	36.531	127.638	54	4.8
1970	2	14	22	56	4.2	31.153	131.313	50	4.4
1970	3	4	9	1	49.57	33.012	130.343	2	4.1
1970	3	4	20	7	6.74	33.066	130.254	1	3.8
1970	3	6	8	44	27.4	33.807	132.227	50	4.1
1970	3	18	2	7	15	31.405	130.76	124	5.3
1970	4	3	13	27	16	33.214	132.33	33	4.3
1970	4	7	4	29	58.95	32.882	130.755	13	3.7
1970	4	22	9	26	2.66	33.058	130.435	1	3.7
1970	4	28	1	50	26.25	32.016	132.002	10	4.3
1970	5	13	17	19	36.92	32.072	132.221	23	4.3
1970	5	31	8	10	9.69	31.691	131.969	16	4.1
1970	6	3	20	11	45.05	32.726	130.206	9	4
1970	6	11	13	40	7.56	31.177	130.396	163	4.1
1970	6	14	12	3	12	31.919	130.39	11	5.5
1970	6	20	4	0	42.62	33.616	132.311	55	3.8
1970	6	22	11	30	20.86	31	131.094	66	4.3
1970	6	22	11	30	22	31.669	130.84	35	4.9
1970	6	24	7	23	37.85	31.113	130.494	153	3.9
1970	6	27	18	36	45.82	31.188	130.866	86	4.2
1970	7	4	14	36	57.03	31.39	131.496	3	4.1
1970	7	10	9	13	29	32.74	130.18	13	4.5
1970	7	12	14	35	28.57	31.671	131.915	0	3.9
1970	7	14	12	20	11.76	32.707	130.187	13	4
1970	7	14	12	51	43.96	32.712	130.171	12	4.2
1970	7	26	7	41	13	32.155	131.81	35	6.3
1970	7	27	16	2	51.55	33.659	132.369	52	4.1
1970	7	28	0	28	21.77	31.956	132.14	25	3.9
1970	7	28	3	12	18	32.1	132.25	10	4.1
1970	7	28	9	7	36	32.16	132.15	0	4.1
1970	7	28	16	54	15.87	32.132	131.8	18	3.8
1970	8	1	13	35	17	31.869	132.12	26	4.3
1970	8	3	15	0	27.18	31.331	131.927	39	4.3
1970	8	3	15	52	33	31.193	131.82	29	4.7
1970	8	9	6	55	46	32.72	130.82	10	4.5
1970	8	10	0	28	35	32.8	130.18	0	4.3
1970	8	16	15	42	13.86	31.226	131.783	55	4.5
1970	8	18	11	0	10.4	31.982	131.3	103	3.9
1970	8	18	14	45	49	31.872	131.96	26	4.5
1970	9	2	19	5	39	31.825	131.3	14	4
1970	9	14	20	15	54	40.757	131.74	560	4.9
1970	9	20	5	30	52	32.803	132.37	29	4.8
1970	9	21	14	8	19	31.169	131.71	32	4.7
1970	9	26	15	55	45.12	34.241	132.338	10	3.6
1970	10	12	18	33	38	42.807	131.09	558	5.5
1970	10	26	5	33	9.16	31.112	130.417	157	4.3
1970	11	8	22	38	55	41.792	131.46	500	4.3
1970	11	21	1	53	0.98	33.096	131.613	79	4.1
1970	11	22	19	54	45	32.07	132.05	0	4.2
1970	11	26	7	51	54	32.37	132.12	0	4.3
1970	12	10	4	33	0	31.154	130.47	170	5.1
1970	12	13	18	54	1	33.12	130.38	20	4.2
1970	12	19	17	23	10	32.63	132.33	20	4.1
1970	12	20	18	30	50	33.43	132.2	40	4
1970	12	31	12	18	59	33.75	132.32	60	4
1971	2	3	3	14	57	31.825	131.73	40	4.8
1971	2	9	11	13	45.77	31.513	131.326	56	3.9
1971	2	15	11	57	39	32.724	130.06	10	4.9
1971	2	20	11	44	20	32.68	130.1	20	4.3
1971	3	7	7	14	49	33.45	130.43	20	4.3
1971	3	18	19	35	54.03	32.547	131.139	139	4.4
1971	3	24	13	40	16	32.78	130.77	10	4.3
1971	3	25	20	56	51	33.07	132.38	50	4.3
1971	3	26	4	46	37	32.6	130.23	20	4.1
1971	3	31	1	0	1	32.75	130.13	10	4.1
1971	4	12	19	35	38	32.82	130.13	0	4.1
1971	4	27	8	58	18	31.7	132.05	10	4.1
1971	4	29	15	25	54.81	33.544	131.781	90	4
1971	5	13	8	28	58.58	31.034	130.594	120	4.3
1971	5	15	13	22	7	34.82	132.22	0	4.4
1971	5	15	4	28	7	32.12	129.87	10	4.1
1971	5	16	6	6	38	33.24	132.31	41	5
1971	5	16	7	11	11	31.228	130.11	155	5.3
1971	5	23	8	34	58	34.22	131.72	10	4.1
1971	5	25	22	0	20	31.372	131.45	33	5.9
1971	5	26	15	13	14	31.363	131.59	33	5.8
1971	5	29	17	52	44	31.378	131.37	33	5.9
1971	6	2	19	14	33	32.972	130.35	12	4.5
1971	6	12	10	57	42	32.819	131.89	59	4.4
1971	6	16	13	12	4.93	31.499	131.951	11	4
1971	6	22	0	18	7	32.72	132.28	0	3.9
1971	6	24	4	52	36.5	32.221	131.057	123	4.1
1971	6	24	12	35	40	33.42	131.97	60	4.1
1971	6	28	11	49	45.63	31.066	131.038	10	3.8
1971	7	14	15	5	45.36	31.632	131.146	86	3.9
1971	8	2	22	59	33.67	31.39	130.533	159	4.2
1971	8	3	1	56	40	35.385	123.91	35	5.6
1971	8	10	9	43	55	31.292	132	29	4.9
1971	8	11	5	40	36	33.651	132.23	49	4.3
1971	8	15	15	47	59	31.335	128.87	10	4.9
1971	8	18	9	15	52.18	31.418	131.866	17	4.1
1971	9	10	0	11	16.71	32.128	131.008	2	3.6
1971	9	11	5	35	59	33.053	129.85	2	4.4
1971	10	11	20	28	49	33.727	131.95	68	4.4
1971	10	14	1	23	17.18	31.28	131.276	50	4.4
1971	10	18	12	2	17	31.823	132.18	3	4.4
1971	10	19	0	23	23.05	33.449	132.098	69	4.4
1971	10	22	21	28	4.06	31.148	129.799	0	4.1
1971	10	25	17	48	37.38	34.045	132.223	65	3.9
1971	10	29	17	28	59	31.827	131.96	25	4.5
1971	11	7	3	15	25	32.45	129.73	10	4.4
1971	11	7	3	36	6	32.47	129.72	10	4.1
1971	11	11	19	17	38.27	31.344	130.501	155	4.3
1971	11	16	11	5	17	31.897	132.15	31	4.5
1972	1	12	23	22	10	33.05	131.18	10	4.3
1972	1	18	4	7	59	33.1	132.1	10	4.4
1972	1	20	17	32	57	33.52	132.28	40	4
1972	2	1	6	4	0.74	31.638	130.726	122	3.8
1972	2	8	23	5	45	31.67	131.75	40	4.1
1972	2	21	22	48	11.4	31.401	131.945	21	4.1
1972	2	21	23	55	24	31.365	131.84	26	5
1972	2	24	7	25	26	32.68	132.43	10	4.1
1972	3	22	17	10	39	32.45	129.95	0	4.3
1972	3	23	0	6	53	32.78	132	30	4
1972	4	14	4	43	55.98	33.256	131.297	0	4
1972	4	24	1	41	28.46	32.558	132.435	16	4
1972	5	12	3	33	32	33	130.58	20	4.1
1972	5	16	20	26	36	34.65	131.97	10	4.2
1972	5	18	13	20	19	34.18	132.17	10	3.9
1972	5	23	12	36	21	31.66	131.92	24	3.9
1972	5	27	22	55	15	36.684	123.74	35	5
1972	6	3	16	44	57.71	32.782	130.213	8	3.7
1972	6	22	0	29	51	32.014	131.86	33	5.6
1972	7	5	22	28	30.42	31.004	130.923	102	3.8
1972	8	16	16	54	17	31.67	131.99	10	4.2
1972	9	3	1	31	39	33.62	130.17	20	4.1
1972	9	6	20	42	25	32.787	130.43	11	5
1972	9	11	23	29	49	32.75	130.43	10	4.1
1972	9	14	12	35	6	31.666	132.06	23	4.2
1972	10	1	2	27	30.87	31.265	132.071	17	4.1
1972	10	16	15	29	8.65	31.295	131.125	78	3.8
1972	10	21	22	4	45	32.67	129.9	10	4.2
1972	10	27	16	9	3	32.6	130.02	0	4.1
1972	11	2	19	57	18	32.7	129.9	10	4.5
1972	11	9	5	41	34	33.446	132.44	33	4.4
1972	11	18	3	55	36	32.78	131.25	10	4.1
1972	11	29	16	52	23	34.65	132.3	20	4.1
1972	12	2	23	31	4.58	33.565	131.874	86	4.1
1972	12	4	7	8	36	31.919	131.76	28	5.4
1972	12	10	22	41	37	32.42	131.68	20	4.1
1973	2	25	19	9	45	34.732	132.38	5	4.6
1973	2	26	22	38	13	33.693	132.31	43	4.4
1973	3	3	8	20	3.21	35.044	131.993	17	4.1
1973	5	24	19	42	5	33.146	131.44	121	4.1
1973	6	9	22	44	48.97	31.147	130.46	159	4.2
1973	6	18	18	58	25.41	31.063	131.567	0	4.1
1973	6	21	15	42	51.76	32.081	130.078	2	4
1973	7	3	19	57	9	31.007	130.47	148	5.2
1973	7	7	16	48	18.02	32.697	130.747	9	3.9
1973	7	9	14	14	12.7	31.541	129.069	13	4.4
1973	7	26	23	45	51	32.062	131.07	110	4.4
1973	7	30	23	16	15	31.798	131.89	36	5.1
1973	8	10	18	26	50.78	32.793	130.236	4	3.9
1973	8	11	5	59	49.94	31.329	130.54	152	4.1
1973	8	14	2	48	54	32.57	131.93	29	4.2
1973	8	25	7	18	0	33	130.25	0	4.2
1973	8	30	19	41	28	32.451	130.26	13	4.5
1973	9	2	5	37	26	33.424	130.55	13	5.1
1973	9	9	4	29	47	33.557	132.28	45	4.7
1973	9	10	16	43	35	42.496	130.99	566	6
1973	9	22	0	24	29.62	31.965	132.181	12	4.1
1973	9	29	9	44	2	41.955	131.01	578	6.6
1973	10	13	13	23	16	31.77	131.9	0	4.1
1973	11	15	15	18	52	33.28	132.2	30	4.1
1973	11	16	3	2	51	33.557	131.84	87	4.1
1973	11	19	0	53	3	31.88	129.15	23	5
1973	11	25	20	11	22	31.9	129.27	10	4.3
1973	12	3	8	26	31.1	33.723	130.606	19	3.7
1973	12	6	16	17	5.95	33.602	132.435	44	4.1
1973	12	11	14	51	57	33.73	132.23	40	4.3
1973	12	27	13	19	18	33.3	132.38	30	4
1973	12	31	1	25	41	32.12	132	40	4.3
1974	1	1	6	28	8	33.12	130.48	0	4.2
1974	1	4	3	30	35	32.915	132.25	35	4.1
1974	1	7	0	57	21	32.73	130.2	10	4.1
1974	1	10	19	31	51	42.416	131.14	550	4.9
1974	1	11	1	13	27	31.868	131.76	33	5.4
1974	1	11	1	44	53	31.718	131.88	14	4.4
1974	1	13	10	41	9	31.95	131.8	0	4.3
1974	1	20	15	38	53	33.356	132.34	47	4.4
1974	1	31	16	3	59	31.815	131.91	32	6
1974	2	4	8	35	3	32.93	130.9	20	4.4
1974	2	4	8	41	50.66	32.949	130.92	6	3.9
1974	2	11	20	17	32.28	32.919	130.925	0	4.5
1974	2	13	20	52	50	32.93	130.75	0	3.9
1974	3	26	14	9	15	32.756	130.42	11	4.3
1974	4	18	18	42	42	32.78	131.7	60	4.2
1974	4	22	19	27	1	33.386	131.98	59	4.1
1974	5	17	20	25	39	31.185	131.52	32	4.4
1974	5	31	21	7	49	31	131	0	4.2
1974	6	8	4	23	35.26	31.061	131.521	55	4.4
1974	6	12	5	1	8	32	129.73	0	4.3
1974	6	27	13	49	18	32.306	132.07	39	5.3
1974	6	29	9	34	59.25	31.092	131.431	53	4.1
1974	6	30	13	49	6	32.73	130	0	4.3
1974	7	7	5	13	1	33.572	132.32	54	5.3
1974	7	19	14	8	1.28	32.567	129.892	11	4.2
1974	8	3	5	15	31.04	31.355	130.602	165	4.1
1974	10	11	3	4	40	33.033	130.23	13	4.4
1974	10	19	1	44	43.85	31.469	131.978	24	4.2
1974	11	25	23	39	29	33.042	131.48	112	5.1
1974	12	21	10	8	10	31.167	131.41	29	4.8
1974	12	22	13	46	20	41.349	123.52	10	5.4
1974	12	22	15	16	30	31.526	131.81	29	5
1974	12	28	9	20	41	31.679	131.46	55	4.6
1975	1	15	11	10	1.27	31.203	130.379	175	4.2
1975	1	23	23	19	17	33.008	131.11	10	5.5
1975	2	4	11	35	35	41.034	122.72	10	4.9
1975	2	4	20	36	7	40.661	122.68	16	6.3
1975	2	4	22	40	10	39.913	122.75	35	5.1
1975	2	5	18	45	21	32.75	130.1	10	4.1
1975	2	6	0	52	58	40.859	122.67	19	4.9
1975	2	6	13	24	57	40.783	122.31	24	5.5
1975	2	9	16	10	6.67	31.184	131.663	56	4.3
1975	2	12	21	42	50	40.84	122.84	35	5.1
1975	2	15	22	8	9	40.802	122.64	30	5.4
1975	2	16	23	1	24	40.77	122.58	24	5.5
1975	2	21	18	34	56.88	31.955	130.213	0	3.9
1975	2	23	8	43	51	32.08	132.18	0	4.3
1975	2	25	5	52	12	42.356	123.07	10	4.9
1975	2	26	6	9	52	40.837	122.65	13	5.1
1975	3	7	2	0	30	32.93	130.95	10	4
1975	3	8	0	7	46	33.02	131.1	10	4
1975	3	25	16	1	5.85	31.832	132.038	39	4.2
1975	4	10	4	55	39	40.849	122.44	35	5
1975	4	13	4	3	6.74	31.369	132.042	104	4.1
1975	4	20	22	42	56	33.977	129.32	15	5.3
1975	4	20	22	42	57.75	31.231	130.426	161	4.2
1975	4	21	2	35	52	33.139	131.32	6	5.8
1975	4	22	22	36	54.28	33.002	131.164	2	3.9
1975	4	25	14	11	15.63	31.468	131.995	25	4.1
1975	5	3	19	15	51.71	31.038	130.417	148	4.1
1975	5	7	19	33	57.29	31.372	130.461	168	3.9
1975	5	13	7	5	1.51	33.061	131.119	0	3.7
1975	6	5	21	18	40	34.742	131.91	15	4.9
1975	6	18	0	18	39	33.261	131.92	67	5
1975	6	23	0	42	52	31.77	131.85	20	4.4
1975	6	23	21	24	36.77	31.001	130.53	142	4.1
1975	6	27	6	5	18	32.773	132.14	30	4.3
1975	6	29	19	37	42	38.769	130.07	562	6.3
1975	7	6	17	56	52	32.77	130.8	10	4.3
1975	7	8	9	42	26	32.95	130.33	10	4.1
1975	7	10	18	6	45.58	32	129.865	0	4.1
1975	7	16	0	2	17	32.97	131.05	0	4.2
1975	7	26	8	27	50	32.55	132.2	20	4.4
1975	7	28	2	16	43	32.936	131.32	128	5.1
1975	8	1	6	12	42	31.033	131.72	14	4.6
1975	8	8	3	11	40	33.863	132.2	60	5.3
1975	8	26	17	13	11.31	31.97	132.298	7	4.2
1975	8	28	23	5	8	40.596	122.29	35	5.1
1975	9	17	14	51	15	33.23	132.27	40	4.1
1975	9	18	17	38	45	32.048	132.18	8	4.6
1975	9	30	8	21	17	33.02	131.03	0	4
1975	9	30	11	16	49.37	31.982	130.794	16	3.9
1975	9	30	15	36	55.19	33.748	132.26	46	4.1
1975	10	1	5	53	26.13	32.777	131.124	0	3.8
1975	10	1	7	49	11.82	32.056	130.848	0	3.8
1975	10	9	6	47	58	32.55	131.03	165	5.1
1975	10	17	11	33	33	32.07	130.87	0	4.3
1975	10	17	11	38	43.55	32.033	130.851	19	4.1
1975	10	28	13	54	48	32.12	130.13	0	4.2
1975	11	2	13	5	4.62	33.089	130.405	18	4
1975	11	7	19	3	41	31.036	131.48	42	4.8
1975	11	28	4	20	21.04	33.101	130.409	17	3.9
1975	12	3	4	24	21.32	32.964	130.336	5	3.8
1975	12	10	13	40	31	32.3	132.25	10	4.3
1975	12	10	21	23	29.65	31.165	132.317	61	4.3
1975	12	11	10	17	53	31.19	132.39	19	5
1975	12	16	7	31	5	32.95	129.9	20	3.8
1975	12	28	11	34	18	32.989	132.26	34	5.2
1976	1	5	5	52	48	33.05	132.23	30	4.4
1976	1	6	14	8	8	32.97	132.03	30	3.9
1976	1	6	16	1	11	32.97	130.92	0	4.3
1976	1	14	4	26	55	31.302	132.43	19	5
1976	1	20	15	30	27.74	31.324	132.324	64	4.3
1976	1	27	4	49	38.1	33.176	132.337	52	3
1976	1	28	20	26	39.95	33.015	132.288	37	4.1
1976	1	29	7	22	21	32.97	130.73	0	4.1
1976	2	2	6	19	44	33.905	132.2	51	5
1976	2	6	21	23	14	32.78	130.82	10	3.9
1976	3	4	13	52	30	32.398	131.24	106	5.2
1976	3	13	8	22	44	32.65	132.15	20	4.2
1976	3	16	9	38	22	33	131.12	0	3.8
1976	3	19	5	8	17	33.32	132.35	30	4
1976	3	26	23	29	15	33.12	130.47	10	4.2
1976	4	9	17	10	46	33.12	130.5	10	3.7
1976	4	11	22	3	39	42.809	131.24	557	5.3
1976	4	12	15	12	21	33.444	132.28	41	4.5
1976	4	22	12	32	16	31.7	131.97	20	4.1
1976	4	23	20	27	5	33.05	131.08	10	3.9
1976	5	12	13	18	23	31.98	130.03	0	4
1976	5	18	11	17	44	31.457	129.59	10	4.4
1976	5	28	20	33	26	33	130.48	20	3.9
1976	6	17	15	24	4	32.57	129.8	0	4.1
1976	6	18	12	45	54	33.08	130.53	10	3.8
1976	6	23	3	22	37	32.73	130.18	10	4.3
1976	6	24	0	50	50	33.236	132.34	41	4.3
1976	7	5	17	16	12	33.13	130.47	20	3.9
1976	7	6	19	13	14	32.08	132.13	10	4.1
1976	7	6	19	58	22	32.083	132.19	10	4.5
1976	7	23	10	2	22	31.131	130.5	161	5
1976	8	11	6	51	4.28	32.92	130.68	10	4.5
1976	8	16	14	59	3.64	31.517	131.867	20	4.1
1976	8	16	14	59	3.64	31.52	131.87	20	4.1
1976	8	31	23	53	5	32.446	131.61	19	4.8
1976	9	3	14	33	14	33.12	131.2	0	3.9
1976	9	8	10	15	2	32.33	129.67	10	4.2
1976	9	28	2	32	4.17	32.633	130.833	10	4.5
1976	9	28	2	32	42	32.668	130.82	14	4.4
1976	10	6	10	1	11	35.229	124.19	16	5.5
1976	11	3	10	20	26	32.98	130.22	10	3.6
1976	11	19	14	41	4.74	31.867	132	0	4.4
1976	11	19	14	41	4.74	31.87	132	0	4.4
1976	11	24	15	13	20	32.45	129.87	10	4.1
1976	11	26	0	34	15	32.78	130.8	10	3.9
1977	1	4	11	6	27	41.084	131.6	530	4.5
1977	1	5	20	0	45	33.07	130.78	10	3.9
1977	1	6	5	52	4.06	33.2	132.083	40	3.6
1977	1	6	5	52	41	33.2	132.08	40	3.9
1977	1	9	10	15	17	33.6	132.28	30	3.7
1977	1	15	9	40	4.97	31.483	131.917	40	4.5
1977	1	15	9	40	4.97	31.48	131.92	40	4.5
1977	1	20	21	45	4.75	33.133	132.033	30	2.9
1977	1	20	21	45	47	33.13	132.03	30	3.6
1977	1	24	21	50	1.74	32.967	131.433	100	3.4
1977	2	4	6	31	5.09	42.867	131.35	580	4.9
1977	2	4	6	31	52	42.846	131.18	549	5.2
1977	2	19	16	21	12	32.7	129.98	10	3.8
1977	2	20	11	30	15	32.65	132.18	30	3.9
1977	2	22	14	6	4.17	32.17	129.8	0	4.3
1977	3	3	4	5	7	31.22	131.8	70	4.1
1977	3	3	18	18	8	33	130.68	10	3.9
1977	3	9	23	27	5.69	41.667	131.417	600	6.5
1977	3	10	7	31	5.32	32.717	132.083	50	3.6
1977	3	10	7	31	53	32.72	132.08	50	3.9
1977	3	13	22	2	18	33.301	132.4	41	4.9
1977	3	16	15	4	4.06	31.883	131.983	10	3
1977	3	16	15	4	41	31.88	131.98	10	3.9
1977	3	17	20	53	7	33.02	130.22	50	3.9
1977	3	25	1	32	7	31.25	130.58	40	4.1
1977	3	25	5	50	6	33.12	130.5	20	3.7
1977	3	25	9	5	3.68	32.783	130.467	0	3
1977	3	25	9	5	37	32.78	130.47	0	3.8
1977	3	27	5	59	49	32.12	130.85	0	3.9
1977	3	27	11	48	59	32.73	132.13	40	3.9
1977	3	27	22	23	4.58	32	130.117	10	3.9
1977	3	27	22	23	4.58	32	130.12	10	3.9
1977	3	29	16	34	5.37	33.733	131.817	80	4
1977	3	29	16	34	5.37	33.73	131.82	80	4
1977	4	3	12	27	23	31.25	131.75	0	4.1
1977	4	4	3	18	59	32.5	130.52	10	3.8
1977	4	4	23	26	27	32.83	130.58	10	4.3
1977	4	6	6	0	30	32.83	130.57	10	3.8
1977	4	11	2	54	5	32.78	130.78	10	4.3
1977	4	12	0	15	27	33.08	130.57	20	3.8
1977	4	12	2	5	24	32.7	130.55	10	3.9
1977	4	12	19	38	4.71	31.7	132.017	20	5
1977	4	12	19	38	50	31.814	131.79	32	5.5
1977	4	24	4	48	5.21	33.683	131.833	70	3
1977	4	30	3	27	22	31.55	131.8	70	4
1977	4	30	8	4	23	32.83	130.62	10	3.9
1977	4	30	15	37	11	32.92	130.98	10	3.8
1977	5	2	6	50	4.12	33.817	132.2	50	3
1977	5	2	6	50	41	33.82	132.2	50	3.8
1977	5	4	15	57	8	33.22	131.35	10	3.7
1977	5	8	10	27	37	33.85	131.95	60	3.8
1977	5	9	5	48	29	33.03	130.27	0	4.1
1977	5	9	6	10	15	32.994	130.17	3	4
1977	5	10	16	5	15	34.2	131.58	10	3.8
1977	5	11	0	22	7	32.97	130.75	0	4.1
1977	5	11	2	16	4.48	33.433	131.767	80	2.9
1977	5	11	9	14	49	33.07	130.13	10	3.6
1977	5	20	0	36	8	32.68	132.03	60	3.7
1977	5	20	1	28	9	32.95	132.07	50	4.1
1977	5	22	0	26	16	33.02	131.07	0	3.9
1977	5	23	4	36	31	32.93	130.77	10	3.9
1977	5	23	10	5	17	33.02	131.05	10	3.9
1977	5	23	12	50	6	32.95	130.75	0	3.9
1977	5	24	17	17	49	33.43	132.17	60	3.7
1977	5	25	6	50	30	31.003	131.65	32	4.6
1977	5	25	9	14	20	33.03	130.73	10	3.9
1977	5	29	23	54	5.17	31.65	131.467	50	3.4
1977	5	29	23	54	52	31.65	131.47	50	3.8
1977	6	1	11	48	1.28	32.6	131.233	150	3.8
1977	6	4	12	14	36	32.17	132.1	30	3.9
1977	6	4	23	45	4.04	32.483	129.75	0	4.3
1977	6	4	23	45	4.04	32.48	129.75	0	4.3
1977	6	7	4	59	0	31.881	129.06	7	4.4
1977	6	7	13	8	1	32.98	131.02	30	3.4
1977	6	16	16	13	23	32.83	130.77	10	4.3
1977	6	17	3	16	4.69	32.75	130.683	20	3.4
1977	6	28	11	46	4.29	32.9	130.717	10	5.1
1977	7	2	7	50	5.74	31.983	132.067	0	4.5
1977	7	2	7	50	5.74	31.98	132.07	0	4.5
1977	7	13	3	51	33	33.03	132.3	50	3.9
1977	7	14	20	20	5	31.88	131.95	10	4.1
1977	7	26	15	58	2.81	31.283	130.95	170	3.8
1977	7	31	15	30	4.96	32.283	131.383	70	4.1
1977	7	31	15	30	50	32.28	131.38	70	4
1977	8	5	23	46	5.81	33.417	132.267	50	3.9
1977	8	5	23	46	58	33.42	132.27	50	4
1977	8	10	7	28	4.21	33.417	132.367	40	4.1
1977	8	10	7	28	4.21	33.42	132.37	40	4.1
1977	8	17	1	55	9	33.03	130.28	10	3.9
1977	8	26	7	51	5	33.187	131.42	128	5
1977	9	1	22	24	5.49	32.083	132.15	0	4.3
1977	9	1	22	24	5.49	32.08	132.15	0	4.3
1977	9	4	13	23	0.16	33.383	131.867	80	3.4
1977	9	5	23	33	16	33.521	131.88	76	4.4
1977	9	9	11	35	4	42.949	131.53	551	5.3
1977	9	18	12	22	8	34.17	131.48	20	4.2
1977	9	18	22	35	2	32.93	130.7	0	4.1
1977	9	23	2	37	16	32.9	130.72	10	3.8
1977	10	2	9	21	25	33.5	132.18	0	3.8
1977	10	3	7	45	22	33.5	132.22	20	3.8
1977	10	7	13	44	3.94	31.583	131.9	30	4.1
1977	10	7	13	44	39	31.58	131.9	30	4.2
1977	10	9	7	40	10	31.13	131.87	70	4.3
1977	10	9	20	41	5.81	33.35	131.95	70	3.8
1977	10	9	20	41	58	33.35	131.95	70	4.1
1977	10	15	23	31	5.81	33.55	132.383	50	3.8
1977	10	15	23	31	58	33.55	132.38	50	4.1
1977	10	20	13	14	3.84	31.85	131.9	20	4.7
1977	10	20	13	14	39	31.832	131.92	25	5
1977	10	31	12	27	3	31.73	131.95	40	4.5
1977	10	31	13	53	5.21	31.767	131.983	0	3.9
1977	10	31	13	53	52	31.77	131.98	0	4.1
1977	11	11	17	44	33	35.02	131.28	10	3.6
1977	11	12	7	35	5.44	31.567	131.95	20	4.5
1977	11	12	7	35	54	31.491	131.88	11	4.4
1977	11	13	15	1	10	33.48	132.17	50	3.7
1977	11	19	5	51	5.06	33.317	132.1	60	3.4
1977	11	19	5	51	51	33.32	132.1	60	3.9
1977	12	1	20	34	33	32.97	130.38	20	4.1
1977	12	4	2	6	23	41.793	131.21	550	4.8
1977	12	6	2	20	3.41	32.88	130.68	10	3.9
1977	12	7	9	3	14	32.88	130.72	20	3.4
1977	12	21	13	37	5.29	33	132	50	3.6
1977	12	21	13	37	53	33	132	50	3.9
1978	1	2	11	17	5.45	33.167	130.6	10	2.9
1978	1	2	11	17	55	33.17	130.6	10	3.6
1978	1	7	9	5	24	32.88	130.78	10	3.4
[truncated: 37,979 more rows]
