# Supplementary material for: An updated, homogeneous, and declustered earthquake catalog for South Korea and neighboring regions
Source: Copernicus journal article supplement (doi:10.5194/nhess-25-4021-2025), 2025-10-20
Supplement: Supplementary file [file nhess-25-4021-2025-supplement-title-page.pdf › nhess-25-4021-2025-supplement-title-page.pdf]

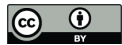

## *Supplement of*

# **An updated, homogeneous, and declustered earthquake catalog for South Korea and neighboring regions**

**Soumya Kanti Maiti and Byungmin Kim**

*Correspondence to:* Byungmin Kim ([byungmin.kim@unist.ac.kr](mailto:byungmin.kim@unist.ac.kr))

- [nhess-25-4021-2025-supplement-title-page.pdf](#)
- [Figures S1-S6\\_Completeness analysis.pdf](#)
- [Table S1\\_HomogeneousCatalog\\_Mw.xlsx](#)
- [Table S2\\_Mainshocks\\_Gardner\\_Method.xlsx](#)
- [Table S3\\_Mainshocks\\_Uhrhammer\\_Method.xlsx](#)
- [Table S4\\_Mainshocks\\_Reasenbergs\\_Method.xlsx](#)
- [Table S5\\_Mainshocks\\_Marsan\\_Method.xlsx](#)

The copyright of individual parts of the supplement might differ from the article licence.
